1 **The Therapy Intensity Level scale for traumatic brain injury:**  
2 **clinimetric assessment on neuro-monitored patients across**  
3 **52 European intensive care units**

4  
5 **Shubhayu Bhattacharyay<sup>1,2,\*</sup>, Erta Beqiri<sup>3</sup>, Patrick Zuercher<sup>4</sup>, Lindsay Wilson<sup>5</sup>,**  
6 **Ewout W Steyerberg<sup>6</sup>, David W Nelson<sup>7</sup>, Andrew I R Maas<sup>8,9</sup>, David K Menon<sup>1</sup>, Ari**  
7 **Ercole<sup>1,10</sup>, and the CENTER-TBI investigators and participants<sup>†</sup>**

8  
9 <sup>1</sup>Division of Anaesthesia, University of Cambridge, Cambridge, United Kingdom.

10 <sup>2</sup>Department of Clinical Neurosciences, University of Cambridge, Cambridge, United  
11 Kingdom.

12 <sup>3</sup>Brain Physics Laboratory, Division of Neurosurgery, University of Cambridge,  
13 Cambridge, United Kingdom.

14 <sup>4</sup>Department of Intensive Care Medicine, Inselspital, Bern University Hospital, University  
15 of Bern, Switzerland.

16 <sup>5</sup>Division of Psychology, University of Stirling, Stirling, United Kingdom.

17 <sup>6</sup>Department of Biomedical Data Sciences, Leiden University Medical Center, Leiden,  
18 The Netherlands.

19 <sup>7</sup>Department of Physiology and Pharmacology, Section for Perioperative Medicine and  
20 Intensive Care, Karolinska Institutet, Stockholm, Sweden.

21 <sup>8</sup>Department of Neurosurgery, Antwerp University Hospital, Edegem, Belgium.

22 <sup>9</sup>Department of Translational Neuroscience, Faculty of Medicine and Health Science,  
23 University of Antwerp, Antwerp, Belgium.

24 <sup>10</sup>Cambridge Centre for Artificial Intelligence in Medicine, Cambridge, United Kingdom.

25

26 \*Corresponding author: [sb2406@cam.ac.uk](mailto:sb2406@cam.ac.uk) (SB)

27 †A full list of the CENTER-TBI investigators and participants are listed after the  
28 acknowledgements.

## 29 ABSTRACT

30  
31 The Therapy Intensity Level (TIL) scale and its abridged version (TIL<sup>(Basic)</sup>) are used to  
32 record the intensity of daily management for raised intracranial pressure (ICP) after  
33 traumatic brain injury (TBI). However, it is uncertain: (1) whether TIL is valid across the  
34 wide variation in modern ICP treatment strategies, (2) if TIL performs better than its  
35 predecessors, (3) how TIL's component therapies contribute to the overall score, and (4)  
36 whether TIL<sup>(Basic)</sup> may capture sufficient information. We aimed to answer these questions  
37 by assessing TIL on a contemporary population of ICP-monitored TBI patients ( $n=873$ ) in  
38 52 intensive care units (ICUs) across 18 European countries and Israel. From the  
39 observational, prospective Collaborative European NeuroTrauma Effectiveness  
40 Research in TBI (CENTER-TBI) study, we extracted first-week daily TIL scores (TIL<sub>24</sub>),  
41 ICP values, physician-based impressions of aberrant ICP, clinical markers of injury  
42 severity, and six-month functional outcome scores. We evaluated the construct and  
43 criterion validity of TIL against that of its predecessors, an unweighted version of TIL, and  
44 TIL<sup>(Basic)</sup>. We calculated the median score of each TIL component therapy for each total  
45 score as well as associations between each component score and markers of injury  
46 severity. Moreover, we calculated the information coverage of TIL by TIL<sup>(Basic)</sup>, defined by  
47 the mutual information of TIL and TIL<sup>(Basic)</sup> divided by the entropy of TIL. The statistical  
48 validity measures of TIL were significantly greater or similar to those of alternative scales,  
49 and TIL integrated the widest range of modern ICP treatments. First-week median TIL<sub>24</sub>  
50 (TIL<sub>median</sub>) outperformed first-week maximum TIL<sub>24</sub> (TIL<sub>max</sub>) in discriminating refractory  
51 intracranial hypertension (RIC) during ICU stay, and the thresholds which maximised the  
52 sum of sensitivity and specificity for RIC detection were TIL<sub>median</sub>≥7.5 (sensitivity: 81%  
53 [95% CI: 77–87%], specificity: 72% [95% CI: 70–75%]) and TIL<sub>max</sub>≥14 (sensitivity: 68%  
54 [95% CI: 62–74%], specificity: 79% [95% CI: 77–81%]). The sensitivity-specificity-  
55 optimising TIL<sub>24</sub> threshold for detecting surgical ICP control was TIL<sub>24</sub>≥9 (sensitivity: 87%  
56 [95% CI: 83–91%], specificity: 74% [95% CI: 72–76%]). The median component scores  
57 for each TIL<sub>24</sub> reflected a credible staircase approach to treatment intensity escalation,  
58 from head positioning to surgical ICP control, as well as considerable variability in the use  
59 of cerebrospinal fluid drainage and decompressive craniectomy. First-week maximum  
60 TIL<sup>(Basic)</sup> (TIL<sup>(Basic)</sup><sub>max</sub>) suffered from a strong ceiling effect and could not replace TIL<sub>max</sub>.  
61 TIL<sup>(Basic)</sup><sub>24</sub> and first-week median TIL<sup>(Basic)</sup> (TIL<sup>(Basic)</sup><sub>median</sub>) could be a suitable replacement  
62 for TIL<sub>24</sub> and TIL<sub>median</sub>, respectively (up to 33% [95% CI: 31–35%] information coverage).  
63 Numerical ranges were derived for categorising TIL<sub>24</sub> scores into TIL<sup>(Basic)</sup><sub>24</sub> scores. Our  
64 results validate the TIL scale across a spectrum of ICP management and monitoring  
65 approaches and support its use as an intermediate outcome after TBI.

## 66 MAIN TEXT

67

## 68 Introduction

69

70 Elevated intracranial pressure (ICP) following traumatic brain injury (TBI) may impede the  
71 potential recovery of injured brain tissue and damage initially unaffected brain regions.<sup>1</sup>  
72 Therefore, for TBI patients admitted to the intensive care unit (ICU), clinicians often  
73 monitor ICP and may apply a wide range of ICP-reducing treatments.<sup>2</sup> The selective use  
74 of these treatments typically follows a staircase approach, in which therapeutic intensity  
75 – defined by the risk and complexity of each treatment – is incrementally escalated until  
76 adequate ICP control is achieved.<sup>3–5</sup> Thus, therapeutic intensity must be considered when  
77 interpreting ICP. Even if two TBI patients have comparable ICP readings, a difference in  
78 the intensity of their ICP-directed therapies likely indicates a difference in  
79 pathophysiological severity.

80

81 Several versions of the Therapy Intensity Level (TIL) scale have been developed to rate  
82 and compare the overall intensity of ICP management amongst TBI patients. TIL scales  
83 assign a relative intensity score to each ICP-targeting therapy and return either the sum  
84 or the maximum value of the scores of simultaneously applied therapies. In 1987, Maset  
85 *et al.* produced the original, 15-point TIL scale (TIL<sup>(1987)</sup>) to be assessed once every four  
86 hours.<sup>6</sup> In 2006, Shore *et al.* published the 38-point Paediatric Intensity Level of Therapy  
87 (PILOT) scale,<sup>7</sup> revising TIL<sup>(1987)</sup> to: (1) represent updated paediatric TBI management  
88 practices, (2) have a more practical, daily assessment frequency, and (3) resolve a  
89 statistical ceiling effect. In 2011, the interagency TBI Common Data Elements (CDE)  
90 scheme developed the most recent, 38-point TIL scale as well as a condensed, four-point  
91 TIL<sup>(Basic)</sup> scale through expert consensus.<sup>8</sup> The TIL scale revised PILOT to integrate  
92 additional ICP-directed therapies and to be applicable to adult TBI management.  
93 Moreover, TIL<sup>(Basic)</sup> was proposed as a simple, categorical measure to use when full TIL  
94 assessment would be infeasible. Since Zuercher *et al.* reported the validity and reliability  
95 of TIL in a two-centre cohort ( $n=31$ ) in 2016,<sup>9</sup> the scale has become a popular research  
96 metric for quantifying ICP treatment intensity.<sup>10–13</sup>

97

98 However, several critical questions regarding TIL remain unanswered. It is uncertain  
99 whether the validity of TIL, reported in a relatively small population, can be generalised  
100 across the wide variation of ICP management, monitoring, and data acquisition (i.e.,  
101 intermittent chart recording or high-resolution storage<sup>14</sup>) strategies practised in  
102 contemporary intensive care.<sup>11,12,15,16</sup> Moreover, the scoring configuration of TIL has  
103 never been tested against alternatives (e.g., TIL<sup>(1987)</sup> and PILOT), and the relative  
104 contribution of TIL's component therapies towards the total score is unknown. It is unclear  
105 how TIL<sup>(Basic)</sup> numerically relates to TIL and if the former captures the essential information  
106 of the latter. In this work, we aimed to answer these questions by performing a  
107 comprehensive assessment of TIL on a large, contemporary population of ICP-monitored  
108 TBI patients across European ICUs.

109

## 110 Materials and Methods

111

## 112 **Therapy intensity level (TIL) and alternative scales**

113

114 TIL refers to the 38-point scale developed by the CDE scheme for TBI.<sup>8</sup> The domain or  
115 construct (i.e., targeted concept of a scale) of TIL is the therapeutic intensity of ICP  
116 management. The TIL scale has twelve items, each representing a distinct ICP-targeting  
117 treatment from one of eight modalities, as defined in Table 1. TIL was developed by an  
118 international expert panel which discussed: (1) the relevant ICP-treatment modalities of  
119 modern intensive care, (2) the relative risk and efficacy of individual therapies to derive  
120 scores, and (3) practical and statistical limitations of previous TIL scores.<sup>8</sup> In this way, TIL  
121 is a formative measurement model, in which the construct (i.e., ICP treatment intensity)  
122 is not unidimensional but rather defined by the combination of items (i.e., ICP-targeting  
123 treatments).<sup>17</sup> TIL was shown to have high interrater and intrarater reliability by Zuercher  
124 *et al.*<sup>9</sup> If a decompressive craniectomy was performed as a last resort for refractory  
125 intracranial hypertension, its score was included in the day of the operation and in every  
126 subsequent day of ICU stay. TIL scores can be calculated as frequently as clinically  
127 desired. For our analysis, we calculated the following TIL scores from the first seven days  
128 of ICU stay:

- 129 • TIL<sub>24</sub>, the daily TIL score based on the sum of the highest scores per item per  
130 calendar day,
- 131 • TIL<sub>max</sub>, the maximum TIL<sub>24</sub> over the first week of a patient's ICU stay,
- 132 • TIL<sub>median</sub>, the median TIL<sub>24</sub> over the first week of a patient's ICU stay.

133

134 We also calculated scores from four other therapeutic intensity scales to compare with  
135 TIL scores. The 21-point, unweighted TIL (uwTIL) scale replaces each sub-item score in  
136 TIL with its ascending rank index (i.e., 1, 2, 3, ...) within each item (Table 1). The four-  
137 point TIL<sup>(Basic)</sup> was also developed by the CDE scheme for TBI and takes the maximum  
138 score, from one to four, amongst all included sub-items over the calendar day.<sup>8</sup> We  
139 adapted the 38-point PILOT<sup>7</sup> and 15-point TIL<sup>(1987)</sup> scales<sup>6</sup> with minor adjustments to fit  
140 the items of TIL with a daily assessment frequency. PILOT was also shown to have high  
141 interrater and intrarater reliability by Shore *et al.*<sup>7</sup> For the four alternative scales, daily (i.e.,  
142 uwTIL<sub>24</sub>, TIL<sup>(Basic)</sup><sub>24</sub>, PILOT<sub>24</sub>, and TIL<sup>(1987)</sup><sub>24</sub>), maximum (i.e., uwTIL<sub>max</sub>, TIL<sup>(Basic)</sup><sub>max</sub>,  
143 PILOT<sub>max</sub>, and TIL<sup>(1987)</sup><sub>max</sub>), and median (i.e., uwTIL<sub>median</sub>, TIL<sup>(Basic)</sup><sub>median</sub>, PILOT<sub>median</sub>, and  
144 TIL<sup>(1987)</sup><sub>median</sub>) scores were calculated the same way as were TIL<sub>24</sub>, TIL<sub>max</sub>, and TIL<sub>median</sub>,  
145 respectively.

146

## 147 **Study design and populations**

148

149 Our study population was prospectively recruited for the Collaborative European  
150 NeuroTrauma Effectiveness Research in Traumatic Brain Injury (CENTER-TBI) core and  
151 high-resolution studies. CENTER-TBI is a longitudinal, observational cohort study  
152 (NCT02210221) involving 65 medical centres across 18 European countries and Israel.  
153 Patients were recruited between 19 December 2014 and 17 December 2017 if they met  
154 the following criteria: (1) presentation within 24 hours of a TBI, (2) clinical indication for a  
155 CT scan, and (3) no severe pre-existing neurological disorder. In accordance with

156 relevant laws of the European Union and the local country, ethical approval was obtained  
157 for each site, and written informed consent by the patient or legal representative was  
158 documented electronically. The list of sites, ethical committees, approval numbers, and  
159 approval dates can be found online: <https://www.center-tbi.eu/project/ethical-approval>.  
160 The project objectives and design of CENTER-TBI have been described in detail  
161 previously.<sup>18,19</sup>

162  
163 In this work, we applied the following inclusion criteria in addition to those of CENTER-  
164 TBI (Figure 1): (1) primary admission to the ICU, (2) at least 16 years old at ICU  
165 admission, (3) invasive ICP monitoring, (4) no decision to withdraw life-sustaining  
166 therapies (WLST) on the first day of ICU stay, and (5) daily assessment of TIL.

167  
168 For our sub-studies evaluating the association between TIL and ICP-derived values, we  
169 created two sub-populations based on the type of ICP values available. Patients with end-  
170 hour ICP (ICP<sub>EH</sub>) values, which were recorded by clinicians at the end of every other hour,  
171 constituted the TIL-ICP<sub>EH</sub> sub-population. Patients with high-resolution ICP values  
172 (ICP<sub>HR</sub>), which were automatically stored with monitoring software, constituted the TIL-  
173 ICP<sub>HR</sub> sub-population. All patients in the TIL-ICP<sub>HR</sub> sub-population were also members of  
174 the TIL-ICP<sub>EH</sub> sub-population (Figure 1).

## 175 **Data collection**

176  
177  
178 Data for the CENTER-TBI study was collected through the QuesGen electronic case  
179 report form system (QuesGen Systems Inc, Burlingame, CA, USA) hosted on the  
180 International Neuroinformatics Coordinating Facility (INCF) platform (INCF, Stockholm,  
181 Sweden). All data for the validation populations, except high-resolution signals, were  
182 extracted from the CENTER-TBI core study<sup>19</sup> (v3.0, ICU stratum) using Opal database  
183 software.<sup>20</sup>

## 184 **ICP management data for TIL calculation**

185  
186  
187 Since TIL<sub>24</sub> was found to be a reliable summary of hourly TIL,<sup>9</sup> clinical data pertinent to  
188 the component items of TIL (i.e., ICP-guided treatments, Table 1) were recorded daily  
189 through the first week of ICU stay. We extracted all daily TIL item values for our  
190 population, and calculated TIL<sub>24</sub>, uwTIL<sub>24</sub>, TIL<sup>(Basic)</sup><sub>24</sub>, PILOT<sub>24</sub>, and TIL<sup>(1987)</sup><sub>24</sub> as defined  
191 in Table 1. For patients who underwent WLST, we only extracted TIL item information  
192 from before the documented date of WLST decision.

## 193 **ICP<sub>EH</sub> and related values**

194  
195  
196 End-hour ICP (ICP<sub>EH</sub>), systolic blood pressure (SBP<sub>EH</sub>), and diastolic blood pressure  
197 (DBP<sub>EH</sub>) were recorded by clinicians every two hours for the TIL-ICP<sub>EH</sub> sub-population.  
198 Mean arterial pressure (MAP<sub>EH</sub>) was calculated as  $MAP_{EH} = (SBP_{EH} + 2DBP_{EH})/3$ , and  
199 cerebral perfusion pressure (CPP<sub>EH</sub>) was calculated as  $CPP_{EH} = MAP_{EH} - ICP_{EH}$ . From  
200 ICP<sub>EH</sub> and CPP<sub>EH</sub>, we calculated the following values:

- 201 •  $ICP_{24}$  or  $CPP_{24}$ , the mean ICP or CPP value over a calendar day of ICU stay,
- 202 •  $ICP_{max}$  or  $CPP_{min}$ , the maximum  $ICP_{24}$  or minimum  $CPP_{24}$  value over the first week
- 203 of a patient's ICU stay,
- 204 •  $ICP_{median}$  or  $CPP_{median}$ , the median  $ICP_{24}$  or  $CPP_{24}$  value over the first week of a
- 205 patient's ICU stay.

206

## 207 *ICP<sub>HR</sub> and related values*

208

209 High-resolution signals were collected using either ICM+ software (Cambridge Enterprise  
210 Ltd, Cambridge, UK; <http://icmplus.neurosurg.cam.ac.uk>), Moberg CNS monitor (Moberg  
211 Research Inc, Ambler, PA, USA; <https://www.moberg.com>), or both. Blood pressure was  
212 obtained through arterial lines connected to pressure transducers. High-resolution ICP  
213 ( $ICP_{HR}$ ) was acquired from either an intraparenchymal strain gauge probe (Codman ICP  
214 MicroSensor, Codman & Shurtleff Inc, Raynham, MA, USA), a parenchymal fibre optic  
215 pressure sensor (Camino ICP Monitor, Integra Life Sciences, Plainsboro, NJ, USA;  
216 <https://www.integralife.com/>), or an external ventricular drain. Detailed data collection and  
217 pre-processing methods (i.e., artefact cleaning and down-sampling to ten-second  
218 averaged time series) applied to high resolution signals in our study have been described  
219 previously.<sup>21</sup> Ten-second mean ICP ( $ICP_{HR\_10sec}$ ) and CPP ( $CPP_{HR\_10sec}$ ) time-series were  
220 retrieved for this analysis, and, from  $ICP_{HR\_10sec}$  and  $CPP_{HR\_10s}$ , we calculated  
221  $ICP_{24}/CPP_{24}$ ,  $ICP_{max}/CPP_{min}$ , and  $ICP_{median}/CPP_{median}$  as described above.

222

## 223 *Physician impressions*

224

225 Attending ICU physicians were asked to record their daily concerns with the patient's ICP  
226 and CPP, separately, on a scale from one (not concerned) to ten (most concerned).  
227 Moreover, on each patient's ICU discharge summary, physicians were asked to record  
228 whether the patient experienced refractory intracranial hypertension during his or her ICU  
229 stay. Refractory intracranial hypertension was defined as recurrent, sustained (i.e., of at  
230 least ten minutes) increases of ICP above 20 mmHg despite medical ICP management.  
231 We extracted the daily ICP/ CPP concern ratings and refractory intracranial hypertension  
232 impressions which coincided with the ICU stays of our population.

233

## 234 *Baseline characteristics, prognosis, and outcome*

235

236 We extracted baseline demographic characteristics, Marshall CT classifications,<sup>22</sup> and  
237 Glasgow Coma Scale (GCS)<sup>23</sup> scores from ICU admission.<sup>24</sup> We also extracted Glasgow  
238 Outcome Scale – Extended (GOSE) functional outcome scores at six months post-  
239 injury,<sup>25</sup> with imputation of missing values as previously described.<sup>26</sup> Finally, we extracted  
240 ordinal functional outcome prognosis scores, calculated from a tokenised embedding of  
241 all available clinical information in the first 24 hours of ICU stay, as described previously.<sup>27</sup>

242

## 243 *Validation*

244

245 We appraised the validity of TIL according to recommendations of best practice from  
246 clinimetric literature.<sup>28</sup> Based on the identified domain of TIL, we evaluated the construct  
247 and criterion validities of TIL. Our qualitative and quantitative assessments of TIL were  
248 performed against those of alternative scoring configurations (Table 1) for comparison.  
249

## 250 *Construct validity*

251  
252 Construct validity is the extent to which a clinical scale matches expectations of  
253 associations with parameters within or outside the identified domain. Construct validity is  
254 further broken down into convergent validity (i.e., associations with similar constructs),  
255 discriminant validity (i.e., associations with divergent constructs), and differentiation by  
256 known groups. In this work, statistical associations between study variables were  
257 measured with:

- 258 • Spearman's correlation coefficients ( $\rho$ ) for static (i.e., measured once) variables,
- 259 • repeated measures correlation coefficients ( $r_{rm}$ )<sup>29</sup> – interpreted as within-individual  
260 strength of association – for longitudinal (i.e., measured over time) variables,
- 261 • linear mixed effects regression (LMER) coefficients ( $\beta_{LMER}$ ) of daily scale scores  
262 (e.g., TIL<sub>24</sub>) when regressing ICP<sub>24</sub> or CPP<sub>24</sub> on daily scale scores and the day of  
263 ICU stay (Day<sub>ICU</sub>), accounting for inter-patient variability with random intercepts.  
264 Therefore,  $\beta_{LMER}$  were interpreted as the expected difference in ICP<sub>24</sub> or CPP<sub>24</sub> per  
265 unit increase of daily scale score, independent of time since ICU admission or  
266 inter-patient variation.  
267

268 For convergent validity, we expected therapeutic intensity to correlate at least mildly (i.e.,  
269  $|\rho| \geq 0.2$ ,  $|r_{rm}| \geq 0.2$ ,  $|\beta_{LMER}| > 0$ ) with markers of injury severity (i.e., baseline GCS and  
270 baseline outcome prognoses), functional outcome (i.e., six-month GOSE), clinical  
271 concerns of ICP status, and ICP itself. Accordingly, we calculated: (1)  $\rho$  values between  
272 TIL<sub>max</sub> and GCS, ordinal prognosis scores, GOSE, and ICP<sub>max</sub>, (2)  $\rho$  values between  
273 TIL<sub>median</sub> and GCS, ordinal prognosis scores, GOSE, and ICP<sub>median</sub>, (3)  $r_{rm}$  values between  
274 TIL<sub>24</sub> and physician concern of ICP and ICP<sub>24</sub>, and (4)  $\beta_{LMER}$  of TIL<sub>24</sub> when regressing  
275 ICP<sub>24</sub> on Day<sub>ICU</sub> and TIL<sub>24</sub> (i.e.,  $ICP_{24} \sim Day_{ICU} + TIL_{24}$ ), accounting for inter-patient  
276 variability with random intercepts.  
277

278 For discriminant validity, we expected therapeutic intensity to be more strongly correlated  
279 with ICP and physician concerns of ICP than with CPP and physician concerns of CPP,  
280 respectively. Even though CPP control through fluid loading or vasopressor therapy is a  
281 component modality of TIL (Table 1), we expected TIL to capture ICP management (i.e.,  
282 the construct) more accurately than CPP management. We compared: (1)  $\rho$  values of  
283 TIL<sub>max</sub> vs. CPP<sub>min</sub> to those of TIL<sub>max</sub> vs. ICP<sub>max</sub>, (2)  $\rho$  values of TIL<sub>median</sub> vs. CPP<sub>median</sub> to  
284 those of TIL<sub>median</sub> vs. ICP<sub>median</sub>, (3)  $r_{rm}$  values of TIL<sub>24</sub> vs. CPP<sub>24</sub> to those of TIL<sub>24</sub> vs. ICP<sub>24</sub>,  
285 and (4) the  $\beta_{LMER}$  of TIL<sub>24</sub> when regressing CPP<sub>24</sub> ~ Day<sub>ICU</sub> + TIL<sub>24</sub> to the  $\beta_{LMER}$  of TIL<sub>24</sub> when  
286 regressing ICP<sub>24</sub> ~ Day<sub>ICU</sub> + TIL<sub>24</sub>.  
287

288 For differentiation by known groups, we expected TIL<sub>max</sub> and TIL<sub>median</sub> to effectively  
289 discriminate patients who experienced refractory intracranial hypertension during ICU  
290 stay from those who did not. We calculated the area under the receiver operating

291 characteristic curve (AUC), which, in our case, was interpreted as the probability of a  
292 randomly selected patient with refractory intracranial hypertension having a higher  $TIL_{max}$   
293 or  $TIL_{median}$  score than one without it. We also compared the AUCs of  $TIL_{max}$  and  $TIL_{median}$   
294 to  $ICP_{max}$  and  $ICP_{median}$  and determined the sensitivity and specificity of refractory  
295 intracranial hypertension detection at each threshold of  $TIL_{max}$  and  $TIL_{median}$ .  
296

## 297 *Criterion validity*

298  
299 Criterion (or concurrent) validity is the degree to which there is an association between a  
300 clinical scale and other scales measuring the same construct, particularly a gold standard  
301 assessment. Since there is no extant “gold standard” for assessing ICP management  
302 intensity, we tested the concurrent criterion validity of TIL by calculating its associations  
303 with its predecessors (i.e., PILOT and  $TIL^{(1987)}$ ), mindful of their limitations as described  
304 above. More specifically, we calculated: (1)  $\rho$  values between  $TIL_{max}$  and prior scale  
305 maximum scores (i.e.,  $PILOT_{max}$  and  $TIL^{(1987)}_{max}$ ), (2)  $\rho$  values between  $TIL_{median}$  and prior  
306 scale median scores (i.e.,  $PILOT_{median}$  and  $TIL^{(1987)}_{median}$ ), and (3)  $r_{rm}$  between  $TIL_{24}$  and  
307 prior scale daily scores (i.e.,  $PILOT_{24}$  and  $TIL^{(1987)}_{24}$ ).  
308

## 309 *Component item analysis*

310  
311 We evaluated inter-item (i.e., inter-treatment) and adjusted item-total associations of  
312  $TIL_{24}$ ,  $uwTIL_{24}$ ,  $PILOT_{24}$ , and  $TIL^{(1987)}_{24}$  by calculating  $r_{rm}$  values. Item-total correlations  
313 were adjusted by subtracting the tested item score from the total score prior to calculating  
314 the correlation. We measured Cronbach’s alpha ( $\alpha$ ) to assess internal reliability amongst  
315 scale items at each day of ICU stay. Moreover, we calculated the median score  
316 contribution of each item per total  $TIL_{24}$  score. The association between each  $TIL_{24}$  item  
317 score and  $ICP_{24}$ ,  $CPP_{24}$ , physician concern of ICP, and physician concern of CPP was  
318 calculated with  $r_{rm}$  values. Finally, we trained LMER models regressing  $ICP_{24}$  and  $CPP_{24}$   
319 on all TIL items (with categorical dummy encoding) and  $Day_{ICU}$  concurrently. The  $\beta_{LMER}$   
320 values from these models were interpreted as the average change in  $ICP_{24}$  or  $CPP_{24}$   
321 associated with each treatment when accounting for all other ICP-guided treatments, time  
322 since ICU admission, and inter-patient variability with random intercepts.  
323

## 324 *$TIL^{(Basic)}$ information coverage*

325  
326 We examined the distributions of  $TIL^{(Basic)}_{24}$  per  $TIL_{24}$  and  $TIL_{24}$  per  $TIL^{(Basic)}_{24}$  to derive  
327 thresholds for categorising  $TIL_{24}$  into  $TIL^{(Basic)}_{24}$ . Moreover, we calculated the information  
328 coverage (IC) of  $TIL^{(Basic)}$  by dividing the mutual information (MI) of  $TIL^{(Basic)}$  and TIL by  
329 the entropy of TIL. IC was calculated with  $TIL^{(Basic)}_{24}$  and  $TIL_{24}$  for days one through seven  
330 of ICU stay, with  $TIL^{(Basic)}_{max}$  and  $TIL_{max}$ , and with  $TIL^{(Basic)}_{median}$  and  $TIL_{median}$ .  
331

## 332 *Statistical analysis*

333



## 334 *Multiple imputation of missing values*

335  
336 Five of the static study variables had missing values for some of the patients in our study:  
337 GCS, GOSE, baseline prognosis scores, Marshall CT classifications, and refractory  
338 intracranial hypertension status. We assessed the patterns of missingness  
339 (Supplementary Figure S1) and multiply imputed ( $m=100$ ) these variables with  
340 independent, stochastic predictive mean matching functions using the *mice* package<sup>30</sup>  
341 (v3.9.0). We assumed these variables to be missing-at-random (MAR) (as previously  
342 reported on CENTER-TBI data<sup>31</sup>) and supported this assumption by training imputation  
343 models on all study measures as well as correlated auxiliary variables (e.g., raised ICP  
344 during ICU stay).

345  
346 For daily longitudinal study variables, we considered a value to be missing if the patient  
347 was still in the ICU and WLST had not been decided on or before that day. We assessed  
348 the longitudinal patterns of missingness (Supplementary Figure S2) and multiply imputed  
349 ( $m=100$ ) these variables with the multivariate, time-series algorithm from the *Amelia II*  
350 package<sup>32</sup> (v1.7.6) over the first week of ICU stay. The algorithm exploits both between-  
351 variable and within-variable correlation structures over time to stochastically impute  
352 missing time series values in independently trained runs. We validated the MAR  
353 assumption by identifying characteristics significantly associated with longitudinal  
354 variable missingness (Supplementary Table S1) and included auxiliary information  
355 associated with value missingness (e.g., reasons for stopping ICP monitoring) in the  
356 imputation model.

357

## 358 *Statistical inference*

359  
360 We calculated 95% confidence intervals (CI) for  $\rho$ ,  $r_{rm}$ ,  $\beta_{LMER}$ , AUC, sensitivity, specificity,  
361  $\alpha$ , and IC values using bootstrapping with 1,000 resamples of unique patients. For each  
362 resample, one of the 100 missing value imputations was randomly chosen. Therefore,  
363 confidence intervals represented the uncertainty due to patient resampling and missing  
364 value imputation.

365

## 366 *Code*

367  
368 All statistical analyses were performed in Python (v3.8.2), and all visualisations were  
369 created in R (v4.2.3). All scripts used in this study are publicly available on GitHub:  
370 [https://github.com/sbhattacharyay/CENTER-TBI\\_TIL](https://github.com/sbhattacharyay/CENTER-TBI_TIL).

371

## 372 **Results**

373

### 374 *Study population*

375

376 Of the 4,509 patients available for analysis in the CENTER-TBI core study, 873 patients  
377 from 52 ICUs met the additional inclusion criteria of this work. Amongst them, 837

378 constituted the TIL-ICP<sub>EH</sub> sub-population and 259 constituted the TIL-ICP<sub>HR</sub> sub-  
379 population (Figure 1). Summary characteristics of the overall population as well as those  
380 of the TIL-ICP<sub>EH</sub> and TIL-ICP<sub>HR</sub> sub-populations are detailed in Table 2. Apart from two  
381 of the prognosis scores pertaining to the probability of returning to pre-injury life roles (i.e.,  
382 Pr(GOSE>5) and Pr(GOSE>6)), none of the tested characteristics were significantly  
383 different between patients in the TIL-ICP<sub>HR</sub> sub-population and those outside of it (Table  
384 2).

385  
386 The median ICU stay duration of our population was 14 days (IQR: 7.8–23 days), and  
387 83% ( $n=726$ ) stayed through at least seven calendar days. At each day of ICU stay, less  
388 than 2.4% of the expected TIL scores were missing (Supplementary Figure S2). Each TIL  
389 component item (Table 1) is represented by at least 17% ( $n=147$ , intracranial surgery)  
390 and each sub-item is represented by at least 4.9% ( $n=43$ , high-dose mannitol) of the  
391 population (Supplementary Table S2). The distributions of TIL<sub>max</sub>, TIL<sub>median</sub>, and TIL<sub>24</sub>,  
392 juxtaposed against the scores of alternative scales (Table 1), are displayed in Figure 2.  
393 The distributions of TIL and PILOT were visually similar, and TIL<sup>(Basic)</sup><sub>max</sub> had a strong  
394 ceiling effect (i.e., 57% of the population had the maximum score). Whilst there was no  
395 significant difference in TIL<sub>24</sub> distribution over the first seven days, most patients had their  
396 highest TIL<sub>24</sub> (i.e., TIL<sub>max</sub>) soon after ICU admission (median: day two, IQR: days one–  
397 three). The Spearman's rank correlation coefficient ( $\rho$ ) between TIL<sub>max</sub> and TIL<sub>median</sub> was  
398 0.80 (95% CI: 0.77–0.82), and the median TIL<sub>median</sub>:TIL<sub>max</sub> ratio was 0.65 (IQR: 0.45–  
399 0.80).

400

## 401 **Validation of TIL**

402

403 The 95% CIs of  $\rho$  values, repeated measures correlation coefficients ( $r_{rm}$ ), and linear  
404 mixed effect regression coefficients ( $\beta_{LMER}$ ) of TIL with other study measures are  
405 visualised in Figure 3. Both TIL<sub>max</sub> and TIL<sub>median</sub> had mildly negative correlations (-  
406  $0.26 < \rho_{\text{mean}} < -0.19$ ) with baseline GCS, six-month GOSE, and functional outcome  
407 prognoses (Figure 3A–B). The within-individual association of TIL<sub>24</sub> with physician  
408 concerns of ICP was moderately positive ( $r_{rm}=0.35$  [95% CI: 0.31–0.38]) and significantly  
409 higher than that of TIL<sup>(Basic)</sup><sub>24</sub> (Figure 3C). The association between ICP<sub>median</sub> and TIL<sub>median</sub>  
410 was moderately positive ( $0.35 < \rho_{\text{mean}} < 0.45$ ) with both ICP<sub>EH</sub> and ICP<sub>HR</sub> values, and the  
411 association between ICP<sub>max</sub> and TIL<sub>max</sub> was moderately positive ( $\rho=0.41$  [95% CI: 0.33–  
412 0.46]) with ICP<sub>EH</sub> values. The ICP<sub>max</sub> vs. TIL<sub>max</sub> correlation was not significant ( $\rho=0.01$   
413 [95% CI: -0.16–0.17]) with ICP<sub>HR</sub> values; however, without imputing missing ICP<sub>HR</sub>  
414 values, the  $\rho$  was 0.43 (95% CI: 0.35–0.50). This suggests that the longitudinal  
415 missingness of ICP<sub>HR</sub> (Supplementary Figure S2) for our sample size made the ICP<sub>max</sub>  
416 estimation significantly imprecise. Moreover, the within-individual association with ICP<sub>24</sub>  
417 was either weak or not significant for any daily scale score according to  $r_{rm}$  (Figure 3C)  
418 and  $\beta_{LMER}$  (Figure 3D) values. On average, a single point increase in TIL<sub>24</sub> was associated  
419 with a 0.22 (95% CI: 0.15–0.30) mmHg increase in daily mean ICP<sub>EH</sub> and a 0.19 (95%  
420 CI: -0.06–0.43) mmHg increase in daily mean ICP<sub>HR</sub>. These results mostly affirm the  
421 convergent validity of TIL but highlight the broad intra-patient variability between ICP and  
422 therapeutic intensity. From the distribution of ICP<sub>24</sub> values at each TIL<sub>24</sub> score (Figure

423 4A), we observed both considerable ICP<sub>24</sub> overlap across each TIL<sub>24</sub> score and an overall  
424 positive relationship between TIL<sub>24</sub> and ICP<sub>24</sub>, particularly for TIL<sub>24</sub>≥8.

425  
426 The correlation between TIL and both prior scales (i.e., PILOT and TIL<sup>(1987)</sup>) was positively  
427 strong for maximum, median, and daily scores (Supplementary Figure S3), establishing  
428 the criterion validity of TIL. According to 95% CIs, the association of TIL with prior scales  
429 was stronger than that of uwTIL or TIL<sup>(Basic)</sup> (Supplementary Figure S3).

430  
431 According to  $\rho$ ,  $r_{tm}$ , and  $\beta_{LMER}$  values (Figure 3), the associations of TIL with CPP and of  
432 TIL with physician concerns of CPP were weaker than or not significantly different from  
433 the corresponding associations with ICP. Moreover, the trend of CPP<sub>24</sub> distributions over  
434 different TIL<sub>24</sub> scores is not as visually apparent as that of ICP<sub>24</sub> distributions over different  
435 TIL<sub>24</sub> scores (Figure 4B). These results support the discriminant validity of TIL.

436  
437 In our population, 157 patients (18% of 864 assessed) were reported to experience  
438 refractory intracranial hypertension during ICU stay. TIL<sub>max</sub> correctly discriminated these  
439 patients from the others 81% (95% CI: 78–84%) of the time (Figure 5A), and TIL<sub>median</sub> did  
440 so 83% (95% CI: 80–86%) of the time (Figure 5B). This performance of TIL was  
441 significantly greater than or similar to that of all alternative scales (Figure 5A–B).  
442 Additionally, TIL<sub>median</sub> had significantly greater discrimination performance than ICP<sub>max</sub>  
443 (Figure 5C) and ICP<sub>median</sub> (Figure 5D), respectively. The sensitivity and specificity of  
444 refractory intracranial hypertension detection at each threshold of TIL<sub>max</sub>, TIL<sub>median</sub>,  
445 TIL<sup>(Basic)</sup><sub>max</sub>, and TIL<sup>(Basic)</sup><sub>median</sub> are listed in Supplementary Table S3 and visualised in  
446 Figure 5C–D. The thresholds which maximised the sum of sensitivity and specificity were  
447 TIL<sub>max</sub>≥14 (sensitivity: 68% [95% CI: 62–74%], specificity: 79% [95% CI: 77–81%]) and  
448 TIL<sub>median</sub>≥7.5 (sensitivity: 81% [95% CI: 77–87%], specificity: 72% [95% CI: 70–75%])  
449 (Table 3).

## 451 ***TIL component items***

452  
453 Whilst there was wide variation in item combinations per TIL<sub>24</sub> score (i.e., sum of median  
454 scores was often under diagonal line in Figure 6A), the average order of therapeutic  
455 escalation was fairly consistent: position, sedation, CPP management, ventilatory  
456 management, neuromuscular blockade, hyperosmolar therapy, temperature control, and  
457 then surgery for refractory ICP. Surgical control of ICP occurred in over 50% of reported  
458 cases at each TIL<sub>24</sub> above 18 (Figure 6A), but the threshold which maximised the sum of  
459 sensitivity and specificity in detecting surgical ICP control was TIL<sub>24</sub>≥9 (Table 3,  
460 performance at each threshold is listed in Supplementary Table S4). The inter-item  $r_{tm}$   
461 values of TIL<sub>24</sub> (Supplementary Figure S4) were mostly positive except for cerebrospinal  
462 fluid (CSF) drainage, which did not correlate significantly with most other items, and  
463 decompressive craniectomy, which did not correlate significantly with CSF, ventilatory, or  
464 temperature control. Consistent with Figure 6A, this result suggested that CSF drainage  
465 and decompressive craniectomy were the most variably applied therapies across study  
466 ICUs. The Cronbach's alpha ( $\alpha$ ) value of TIL<sub>24</sub> was, at best, 0.65 (95% CI: 0.62–0.68) and  
467 lower (albeit, not significantly) than that of uwTIL<sub>24</sub> at each day of ICU stay  
468 (Supplementary Figure S5). However, since TIL is a formative scale (i.e., the construct is

469 multidimensional and defined by the items), high inter-item correlation and  $\alpha$  values are  
470 not necessary for item validation.<sup>17</sup> Amongst all TIL<sub>24</sub> items, sedation was most strongly  
471 correlated with adjusted TIL<sub>24</sub> scores and physician concerns of ICP (Figure 6B). From  
472  $10 \leq \text{TIL}_{24} \leq 20$ , a plateau effect of high-dose sedation combined with neuromuscular  
473 blockade was observed in most cases (Figure 6A). When accounting for all other TIL<sub>24</sub>  
474 sub-items, time since ICU admission, as well as inter-patient variability, ventilation,  
475 mannitol administration, and hypertonic saline administration were most strongly  
476 associated with ICP<sub>24</sub> and vasopressors were most strongly associated with CPP<sub>24</sub>  
477 (Figure 6C).

478

## 479 **TIL<sup>(Basic)</sup>**

480

481 Based on the median TIL<sup>(Basic)</sup><sub>24</sub> score at each TIL<sub>24</sub> score (Figure 7A), we derived the  
482 ranges for mapping TIL<sub>24</sub> onto TIL<sup>(Basic)</sup><sub>24</sub> in Table 3. There is, however, considerable  
483 overlap of TIL<sub>24</sub> scores across TIL<sup>(Basic)</sup><sub>24</sub> scores (Figure 7B), particularly in the range of  
484  $6 \leq \text{TIL}_{24} \leq 10$ , and at no TIL<sub>24</sub> score was TIL<sup>(Basic)</sup><sub>24</sub>=3 the most represented score (Figure  
485 7A). TIL<sup>(Basic)</sup><sub>24</sub> covered up to 33% (95% CI: 31–34%) of the information (i.e., entropy) in  
486 TIL<sub>24</sub>, and TIL<sup>(Basic)</sup><sub>median</sub> covered up to 28% (95% CI: 27–30%) of the information in  
487 TIL<sub>median</sub> (Figure 7C). TIL<sup>(Basic)</sup><sub>max</sub> only covered 17% (95% CI: 16–18%) of the information  
488 in TIL<sub>max</sub> (Figure 7C).

489

## 490 **Discussion**

491

492 In this work, we performed a large-scale ( $n=873$ ), multicentre (52 ICUs, 19 countries),  
493 and prospective validation study of TIL and TIL<sup>(Basic)</sup> against alternative scales. The  
494 CENTER-TBI data not only reflect the modern variation in ICP-directed therapeutic  
495 intensity (Figures 2 and 6A) but also illustrate the practical feasibility of daily TIL  
496 assessment: out of 885 eligible patients, 873 (99%) had daily TIL scores (Figure 1) with  
497 less than 2.4% daily missingness (Supplementary Figure S2).

498

499 Our findings support the validity of TIL as a metric for scoring ICP-directed therapeutic  
500 intensity and for marking pathophysiological severity. The statistical construct and  
501 criterion validity measures of TIL were significantly greater or similar to those of  
502 alternative scales (Figures 3 and 5), and TIL integrated the widest range of modern ICP  
503 treatments (Table 1). Our analysis yielded empirical ranges for interpreting TIL in terms  
504 of refractory intracranial hypertension, surgical intervention, and the condensed, TIL<sup>(Basic)</sup>  
505 scores (Table 3). On a component level (Figure 6A), TIL<sub>24</sub> reflected a pattern of treatment  
506 intensity escalation consistent with clinical algorithms<sup>2,3,5</sup> as well as a wide variation in  
507 treatment combinations, particularly in the use of CSF drainage and decompressive  
508 craniectomy. These results support the use of TIL as an intermediate outcome for  
509 treatment effect, as done in previous studies.<sup>33,34</sup>

510

511 Due to a strong ceiling effect (Figures 2A and 5A), TIL<sup>(Basic)</sup> should not be used instead of  
512 TIL for rating maximum treatment intensity. TIL<sup>(Basic)</sup><sub>24</sub> and TIL<sub>median</sub> covered up to 33% of  
513 the information in TIL<sub>24</sub> (Figure 7C), but the TIL<sup>(Basic)</sup><sub>24</sub> associations with physician

514 concerns of ICP were significantly worse than those of TIL<sub>24</sub> (Figure 3C). TIL should  
515 always be preferred to TIL<sup>(Basic)</sup>, but we believe daily or median TIL<sup>(Basic)</sup> can be a suitable  
516 alternative when daily or median TIL assessment is infeasible.

517  
518 Moreover, we evaluated TIL with both end-hour (ICP<sub>EH</sub>) and high-resolution (ICP<sub>HR</sub>) ICP  
519 values. ICP<sub>HR</sub> is the gold standard, and neuromonitoring-related results from the ICP<sub>HR</sub>  
520 population should generally take precedence.<sup>14</sup> However, 67% of expected ICP<sub>HR</sub> values  
521 were missing on day one of ICU stay (Supplementary Figure S2), likely due to the time  
522 required to arrange high-resolution data collection. Consequently, estimates of high-  
523 resolution ICP<sub>max</sub> were significantly affected by missing value imputation and became  
524 imprecise at our sample size (Figure 3A). In these cases, results from the ICP<sub>EH</sub>  
525 population served as a valuable reference on a substantially larger sample size (Table 2)  
526 since ICP<sub>EH</sub> and CPP<sub>EH</sub> have been shown to be fair end-hour representations of ICP<sub>HR</sub>  
527 and CPP<sub>HR</sub>, respectively, in CENTER-TBI.<sup>14</sup> The considerable overlap of ICP<sub>24</sub> values  
528 across TIL<sub>24</sub> scores (Figure 4A) and the insignificant-to-weak, within-individual  
529 association between ICP<sub>24</sub> and TIL<sub>24</sub> (Figure 3C–D) highlight the need to account for  
530 therapeutic intensity when interpreting ICP. Additionally, the higher median ICP<sub>24</sub> values  
531 for TIL<sub>24</sub>≥8 (Figure 4A) may suggest that clinicians accept a slightly higher ICP when  
532 balancing the risks of elevating therapeutic intensity against those of intracranial  
533 hypertension.

534  
535 We see three main opportunities to improve TIL. First, the item scores of TIL and its  
536 predecessors (i.e., PILOT and TIL<sup>(1987)</sup>) were not derived empirically. Data-driven  
537 techniques, such as confirmatory factor analysis,<sup>28</sup> can be used to derive scoring  
538 configurations which optimise a defined objective (e.g., maximal separation of patients).  
539 However, data-driven scores do not necessarily reflect the intended construct (i.e.,  
540 treatment risk and complexity),<sup>35</sup> and, in general, item scoring does not have an  
541 appreciable impact on overall scale performance.<sup>28</sup> Second, the items of TIL must evolve  
542 as therapeutic approaches to ICP management evolve. TIL discriminated refractory  
543 intracranial hypertension status significantly better than TIL<sup>(1987)</sup> (Figure 5A–B) because  
544 TIL updated TIL<sup>(1987)</sup> with six additional items (Table 1). We recommend updating and re-  
545 evaluating TIL each time ICP-treatment modalities or their perceived risks change.  
546 Finally, the development of TIL was largely informed by the perspective of ICU practices  
547 in high-income countries.<sup>8</sup> Likewise, this assessment was performed in a cohort of  
548 patients across Europe and Israel. Especially given the disproportionately higher burden  
549 of TBI in low- and middle-income countries,<sup>36</sup> it is imperative to test and, if necessary,  
550 adapt TIL to a more inclusive, global population of TBI.

551  
552 We recognise several limitations of our analysis. Whilst numerous investigators assessed  
553 TIL across the study ICUs, each TIL score was only assessed once. Therefore, we could  
554 not evaluate the interrater reliability of TIL. Similarly, data needed to calculate the full TIL  
555 score was only recorded once a day, so we could not determine if a daily assessment  
556 frequency was sufficient. Since the prior TIL validation study reported a high interrater  
557 reliability and recommended a daily assessment frequency,<sup>9</sup> we assumed both to be true.  
558 The results from the Randomised Evaluation of Surgery with Craniectomy for  
559 Uncontrollable Elevation of Intracranial Pressure (RESCUEicp) trial<sup>37</sup> – published amidst

560 CENTER-TBI patient recruitment in 2016 – have likely changed the global frequency and  
561 perceived intensity of decompressive craniectomy for TBI. Therefore, we recognise the  
562 potentially confounding effect of the trial results on treatment decision making for some  
563 patients in the CENTER-TBI population and encourage a potential reappraisal of the  
564 therapeutic intensity of decompressive craniectomy through expert discussion and  
565 statistical validation. The physician impressions (i.e., physician concerns of ICP and CPP  
566 and refractory intracranial hypertension status) were subjective, and we did not have  
567 enough information to account for interrater variability. Therefore, these scores and labels  
568 should be considered unrefined. Finally, because of limited dosage data for numerical  
569 treatments (i.e., CSF drainage, ventilation, hyperosmolar therapy, and temperature  
570 control), we did not test alternative sub-item categorisations.

571

## 572 **Conclusion**

573

574 TIL is a valid, generalisable measurement of ICP management amongst neuro-monitored  
575 TBI patients in the ICU. On all validation metrics, TIL performs at least as well as its  
576 alternatives and considers the widest range of modern treatment strategies. TIL's  
577 component scores over increasing TIL reflect a clinically credible order of treatment  
578 escalation, from head positioning to ICP-directed surgery. TIL<sup>(Basic)</sup> is not suitable for  
579 evaluating maximum treatment intensity, but daily TIL<sup>(Basic)</sup> and median TIL<sup>(Basic)</sup> can cover  
580 up to a third of the information in TIL. In the setting of clinical ICP management, TIL is a  
581 more sensitive marker of pathophysiological severity than ICP and can be considered an  
582 intermediate outcome after TBI.

583

## 584 **Transparency, Rigor and Reproducibility Summary**

585

586 The CENTER-TBI study was pre-registered at [clinicaltrials.gov](https://clinicaltrials.gov) (NCT02210221,  
587 <https://clinicaltrials.gov/ct2/show/NCT02210221>). The analysis plan was registered after  
588 beginning data collection but before data analysis at [https://www.center-](https://www.center-tbi.eu/data/approved-proposals)  
589 [tbi.eu/data/approved-proposals](https://www.center-tbi.eu/data/approved-proposals) (#491), and the lead author with primary responsibility for  
590 the analysis certifies that the analysis plan was pre-specified. A sample size of 903  
591 patients was planned based on availability of critically ill, ICP-monitored, adult TBI  
592 patients recruited for CENTER-TBI. Actual sample size was 873, as 18 patients had a  
593 documented decision to WLST on the first day of ICU stay and 12 additional patients did  
594 not have daily TIL scores assessed. A patient inclusion diagram is provided (Figure 1).  
595 TIL scoring and clinical data entry was performed by investigators who were aware of  
596 relevant characteristics of the participants. Participants were recruited between 19  
597 December 2014 and 17 December 2017, and data (including follow-up results) were  
598 collected until 31 March 2021. High-resolution waveforms were stored directly from  
599 bedside monitoring software, as described in the Methods and Materials. Variability  
600 amongst different TIL assessors is not expected to be significant based on the established  
601 high interrater reliability of TIL.<sup>9</sup> All equipment and software used to perform imaging and  
602 preprocessing are widely available from commercial sources or open source repositories.  
603 The clinimetric validation procedure and the primary clinical metric (TIL) are established  
604 standards in the field, based on previously published results<sup>9,28</sup> and this study. The

605 assumption of bootstrapping-derived confidence intervals is that the sample is  
606 representative of the population. This study is, itself, an external validation, and internal  
607 replication by the study group was performed. Individual participant data are available  
608 online, conditional to approved online study proposal, with no end date at  
609 <https://www.center-tbi.eu/data>. Signed confirmation of a data access agreement is  
610 required, and all access must comply with regulatory restrictions imposed on the original  
611 study. All analytic code used to perform the statistical analyses are publicly available  
612 online at: [https://github.com/sbhattacharyay/CENTER-TBI\\_TIL](https://github.com/sbhattacharyay/CENTER-TBI_TIL). This paper will be  
613 published under a Creative Commons Open Access license, and upon publication, will  
614 be freely available at <https://www.liebertpub.com/loi/neu>.

615

## 616 **Acknowledgments**

617

618 This research was supported by the National Institute for Health Research (NIHR) Brain  
619 Injury MedTech Co-operative. CENTER-TBI was supported by the European Union 7<sup>th</sup>  
620 Framework programme (EC grant 602150). Additional funding was obtained from the  
621 Hannelore Kohl Stiftung (Germany), from OneMind (USA), from Integra LifeSciences  
622 Corporation (USA), and from NeuroTrauma Sciences (USA). CENTER-TBI also  
623 acknowledges interactions and support from the International Initiative for TBI Research  
624 (InTBIR) investigators. S.B. is funded by a Gates Cambridge Scholarship. E.B. is funded  
625 by the Medical Research Council (MR N013433-1) and by a Gates Cambridge  
626 Scholarship. The funders had no role in study design, data collection and analysis,  
627 decision to publish, or preparation of the manuscript.

628

629 We are grateful to the patients and families of our study for making our efforts to improve  
630 TBI care possible. S.B. would like to thank Kathleen Mitchell-Fox (Princeton University)  
631 for offering comments on the manuscript.

632

## 633 **The CENTER-TBI investigators and participants**

634

635 The co-lead investigators of CENTER-TBI are designated with an asterisk (\*), and their  
636 contact email addresses are listed below.

637

638 Cecilia Åkerlund<sup>1</sup>, Krisztina Amrein<sup>2</sup>, Nada Andelic<sup>3</sup>, Lasse Andreassen<sup>4</sup>, Audny Anke<sup>5</sup>,  
639 Anna Antoni<sup>6</sup>, Gérard Audibert<sup>7</sup>, Philippe Azouvi<sup>8</sup>, Maria Luisa Azzolini<sup>9</sup>, Ronald Bartels<sup>10</sup>,  
640 Pál Barzó<sup>11</sup>, Romuald Beauvais<sup>12</sup>, Ronny Beer<sup>13</sup>, Bo-Michael Bellander<sup>14</sup>, Antonio Belli<sup>15</sup>,  
641 Habib Benali<sup>16</sup>, Maurizio Berardino<sup>17</sup>, Luigi Beretta<sup>9</sup>, Morten Blaabjerg<sup>18</sup>, Peter Bragge<sup>19</sup>,  
642 Alexandra Brazinova<sup>20</sup>, Vibeke Brinck<sup>21</sup>, Joanne Brooker<sup>22</sup>, Camilla Brorsson<sup>23</sup>, Andras  
643 Buki<sup>24</sup>, Monika Bullinger<sup>25</sup>, Manuel Cabeleira<sup>26</sup>, Alessio Caccioppola<sup>27</sup>, Emiliana  
644 Calappi<sup>27</sup>, Maria Rosa Calvi<sup>9</sup>, Peter Cameron<sup>28</sup>, Guillermo Carbayo Lozano<sup>29</sup>, Marco  
645 Carbonara<sup>27</sup>, Simona Cavallo<sup>17</sup>, Giorgio Chevallard<sup>30</sup>, Arturo Chierogato<sup>30</sup>, Giuseppe  
646 Citerio<sup>31,32</sup>, Hans Clusmann<sup>33</sup>, Mark Coburn<sup>34</sup>, Jonathan Coles<sup>35</sup>, Jamie D. Cooper<sup>36</sup>,  
647 Marta Correia<sup>37</sup>, Amra Čović<sup>38</sup>, Nicola Curry<sup>39</sup>, Endre Czeiter<sup>24</sup>, Marek Czosnyka<sup>26</sup>, Claire  
648 Dahyot-Fizelier<sup>40</sup>, Paul Dark<sup>41</sup>, Helen Dawes<sup>42</sup>, Véronique De Keyser<sup>43</sup>, Vincent Degos<sup>16</sup>,  
649 Francesco Della Corte<sup>44</sup>, Hugo den Boogert<sup>10</sup>, Bart Depreitere<sup>45</sup>, Đula Đilvesi<sup>46</sup>, Abhishek

650 Dixit<sup>47</sup>, Emma Donoghue<sup>22</sup>, Jens Dreier<sup>48</sup>, Guy-Loup Dulière<sup>49</sup>, Ari Ercole<sup>47</sup>, Patrick  
651 Esser<sup>42</sup>, Erzsébet Ezer<sup>50</sup>, Martin Fabricius<sup>51</sup>, Valery L. Feigin<sup>52</sup>, Kelly Foks<sup>53</sup>, Shirin  
652 Frisvold<sup>54</sup>, Alex Furmanov<sup>55</sup>, Pablo Gagliardo<sup>56</sup>, Damien Galanaud<sup>16</sup>, Dashiell Gantner<sup>28</sup>,  
653 Guoyi Gao<sup>57</sup>, Pradeep George<sup>58</sup>, Alexandre Ghuysen<sup>59</sup>, Lelde Giga<sup>60</sup>, Ben Glocker<sup>61</sup>,  
654 Jagoš Golubovic<sup>46</sup>, Pedro A. Gomez<sup>62</sup>, Johannes Gratz<sup>63</sup>, Benjamin Gravesteijn<sup>64</sup>,  
655 Francesca Grossi<sup>44</sup>, Russell L. Gruen<sup>65</sup>, Deepak Gupta<sup>66</sup>, Juanita A. Haagsma<sup>64</sup>, Iain  
656 Haitisma<sup>67</sup>, Raimund Helbok<sup>13</sup>, Eirik Helseth<sup>68</sup>, Lindsay Horton<sup>69</sup>, Jilske Huijben<sup>64</sup>, Peter  
657 J. Hutchinson<sup>70</sup>, Bram Jacobs<sup>71</sup>, Stefan Jankowski<sup>72</sup>, Mike Jarrett<sup>21</sup>, Ji-yao Jiang<sup>58</sup>, Faye  
658 Johnson<sup>73</sup>, Kelly Jones<sup>52</sup>, Mladen Karan<sup>46</sup>, Angelos G. Koliass<sup>70</sup>, Erwin Kompanje<sup>74</sup>, Daniel  
659 Kondziella<sup>51</sup>, Evgenios Kornaropoulos<sup>47</sup>, Lars-Owe Koskinen<sup>75</sup>, Noémi Kovács<sup>76</sup>, Ana  
660 Kowark<sup>77</sup>, Alfonso Lagares<sup>62</sup>, Linda Lanyon<sup>58</sup>, Steven Laureys<sup>78</sup>, Fiona Lecky<sup>79,80</sup>, Didier  
661 Ledoux<sup>78</sup>, Rolf Lefering<sup>81</sup>, Valerie Legrand<sup>82</sup>, Aurelie Lejeune<sup>83</sup>, Leon Levi<sup>84</sup>, Roger  
662 Lightfoot<sup>85</sup>, Hester Lingsma<sup>64</sup>, Andrew I.R. Maas<sup>43,\*</sup>, Ana M. Castaño-León<sup>62</sup>, Marc  
663 Maegele<sup>86</sup>, Marek Majdan<sup>20</sup>, Alex Manara<sup>87</sup>, Geoffrey Manley<sup>88</sup>, Costanza Martino<sup>89</sup>,  
664 Hugues Maréchal<sup>49</sup>, Julia Mattern<sup>90</sup>, Catherine McMahon<sup>91</sup>, Béla Melegh<sup>92</sup>, David  
665 Menon<sup>47,\*</sup>, Tomas Menovsky<sup>43</sup>, Ana Mikolic<sup>64</sup>, Benoit Misset<sup>78</sup>, Visakh Muraleedharan<sup>58</sup>,  
666 Lynnette Murray<sup>28</sup>, Ancuta Negru<sup>93</sup>, David Nelson<sup>1</sup>, Virginia Newcombe<sup>47</sup>, Daan  
667 Nieboer<sup>64</sup>, József Nyirádi<sup>2</sup>, Otesile Olubukola<sup>79</sup>, Matej Oresic<sup>94</sup>, Fabrizio Ortolano<sup>27</sup>,  
668 Aarno Palotie<sup>95,96,97</sup>, Paul M. Parizel<sup>98</sup>, Jean-François Payen<sup>99</sup>, Natascha Perera<sup>12</sup>,  
669 Vincent Perlberg<sup>16</sup>, Paolo Persona<sup>100</sup>, Wilco Peul<sup>101</sup>, Anna Piippo-Karjalainen<sup>102</sup>, Matti  
670 Pirinen<sup>95</sup>, Dana Pisica<sup>64</sup>, Horia Ples<sup>93</sup>, Suzanne Polinder<sup>64</sup>, Inigo Pomposo<sup>29</sup>, Jussi P.  
671 Posti<sup>103</sup>, Louis Puybasset<sup>104</sup>, Andreea Radoi<sup>105</sup>, Arminas Ragauskas<sup>106</sup>, Rahul Raj<sup>102</sup>,  
672 Malinka Rambadagalla<sup>107</sup>, Isabel Retel Helmrich<sup>64</sup>, Jonathan Rhodes<sup>108</sup>, Sylvia  
673 Richardson<sup>109</sup>, Sophie Richter<sup>47</sup>, Samuli Ripatti<sup>95</sup>, Saulius Rocka<sup>106</sup>, Cecilie Roe<sup>110</sup>, Olav  
674 Roise<sup>111,112</sup>, Jonathan Rosand<sup>113</sup>, Jeffrey V. Rosenfeld<sup>114</sup>, Christina Rosenlund<sup>115</sup>, Guy  
675 Rosenthal<sup>55</sup>, Rolf Rossaint<sup>77</sup>, Sandra Rossi<sup>100</sup>, Daniel Rueckert<sup>61</sup>, Martin Rusnák<sup>116</sup>, Juan  
676 Sahuquillo<sup>105</sup>, Oliver Sakowitz<sup>90,117</sup>, Renan Sanchez-Porras<sup>117</sup>, Janos Sandor<sup>118</sup>, Nadine  
677 Schäfer<sup>81</sup>, Silke Schmidt<sup>119</sup>, Herbert Schoechl<sup>120</sup>, Guus Schoonman<sup>121</sup>, Rico Frederik  
678 Schou<sup>122</sup>, Elisabeth Schwendenwein<sup>6</sup>, Charlie Sewalt<sup>64</sup>, Ranjit D. Singh<sup>101</sup>, Toril  
679 Skandsen<sup>123,124</sup>, Peter Smielewski<sup>26</sup>, Abayomi Sorinola<sup>125</sup>, Emmanuel Stamatakis<sup>47</sup>,  
680 Simon Stanworth<sup>39</sup>, Robert Stevens<sup>126</sup>, William Stewart<sup>127</sup>, Ewout W. Steyerberg<sup>64,128</sup>,  
681 Nino Stocchetti<sup>129</sup>, Nina Sundström<sup>130</sup>, Riikka Takala<sup>131</sup>, Viktória Tamás<sup>125</sup>, Tomas  
682 Tamosuitis<sup>132</sup>, Mark Steven Taylor<sup>20</sup>, Braden Te Ao<sup>52</sup>, Olli Tenovuo<sup>103</sup>, Alice Theadom<sup>52</sup>,  
683 Matt Thomas<sup>87</sup>, Dick Tibboel<sup>133</sup>, Marjolein Timmers<sup>74</sup>, Christos Toliaas<sup>134</sup>, Tony Trapani<sup>28</sup>,  
684 Cristina Maria Tudora<sup>93</sup>, Andreas Unterberg<sup>90</sup>, Peter Vajkoczy<sup>135</sup>, Shirley Vallance<sup>28</sup>,  
685 Egils Valeinis<sup>60</sup>, Zoltán Vámos<sup>50</sup>, Mathieu van der Jagt<sup>136</sup>, Gregory Van der Steen<sup>43</sup>,  
686 Joukje van der Naalt<sup>71</sup>, Jeroen T.J.M. van Dijck<sup>101</sup>, Inge A. M. van Erp<sup>101</sup>, Thomas A. van  
687 Essen<sup>101</sup>, Wim Van Hecke<sup>137</sup>, Caroline van Heugten<sup>138</sup>, Dominique Van Praag<sup>139</sup>, Ernest  
688 van Veen<sup>64</sup>, Thijs Vande Vyvere<sup>137</sup>, Roel P. J. van Wijk<sup>101</sup>, Alessia Vargiolu<sup>32</sup>, Emmanuel  
689 Vega<sup>83</sup>, Kimberley Velt<sup>64</sup>, Jan Verheyden<sup>137</sup>, Paul M. Vespa<sup>140</sup>, Anne Vik<sup>123,141</sup>, Rimantas  
690 Vilcinis<sup>132</sup>, Victor Volovici<sup>67</sup>, Nicole von Steinbüchel<sup>38</sup>, Daphne Voormolen<sup>64</sup>, Petar  
691 Vulekovic<sup>46</sup>, Kevin K.W. Wang<sup>142</sup>, Daniel Whitehouse<sup>47</sup>, Eveline Wieggers<sup>64</sup>, Guy  
692 Williams<sup>47</sup>, Lindsay Wilson<sup>69</sup>, Stefan Winzeck<sup>47</sup>, Stefan Wolf<sup>143</sup>, Zhihui Yang<sup>113</sup>, Peter  
693 Ylén<sup>144</sup>, Alexander Younsi<sup>90</sup>, Frederick A. Zeiler<sup>47,145</sup>, Veronika Zelinkova<sup>20</sup>, Agate  
694 Ziverte<sup>60</sup>, Tommaso Zoerle<sup>27</sup>

695



696 <sup>1</sup>Department of Physiology and Pharmacology, Section of Perioperative Medicine and  
697 Intensive Care, Karolinska Institutet, Stockholm, Sweden  
698 <sup>2</sup>János Szentágothai Research Centre, University of Pécs, Pécs, Hungary  
699 <sup>3</sup>Division of Surgery and Clinical Neuroscience, Department of Physical Medicine and  
700 Rehabilitation, Oslo University Hospital and University of Oslo, Oslo, Norway  
701 <sup>4</sup>Department of Neurosurgery, University Hospital Northern Norway, Tromsø, Norway  
702 <sup>5</sup>Department of Physical Medicine and Rehabilitation, University Hospital Northern  
703 Norway, Tromsø, Norway  
704 <sup>6</sup>Trauma Surgery, Medical University Vienna, Vienna, Austria  
705 <sup>7</sup>Department of Anesthesiology & Intensive Care, University Hospital Nancy, Nancy,  
706 France  
707 <sup>8</sup>Raymond Poincaré hospital, Assistance Publique – Hôpitaux de Paris, Paris, France  
708 <sup>9</sup>Department of Anesthesiology & Intensive Care, S Raffaele University Hospital, Milan,  
709 Italy  
710 <sup>10</sup>Department of Neurosurgery, Radboud University Medical Center, Nijmegen, The  
711 Netherlands  
712 <sup>11</sup>Department of Neurosurgery, University of Szeged, Szeged, Hungary  
713 <sup>12</sup>International Projects Management, ARTTIC, München, Germany  
714 <sup>13</sup>Department of Neurology, Neurological Intensive Care Unit, Medical University of  
715 Innsbruck, Innsbruck, Austria  
716 <sup>14</sup>Department of Neurosurgery & Anesthesia & intensive care medicine, Karolinska  
717 University Hospital, Stockholm, Sweden  
718 <sup>15</sup>NIHR Surgical Reconstruction and Microbiology Research Centre, Birmingham, UK  
719 <sup>16</sup>Anesthésie-Réanimation, Assistance Publique – Hôpitaux de Paris, Paris, France  
720 <sup>17</sup>Department of Anesthesia & ICU, AOU Città della Salute e della Scienza di Torino -  
721 Orthopedic and Trauma Center, Torino, Italy  
722 <sup>18</sup>Department of Neurology, Odense University Hospital, Odense, Denmark  
723 <sup>19</sup>BehaviourWorks Australia, Monash Sustainability Institute, Monash University, Victoria,  
724 Australia  
725 <sup>20</sup>Department of Public Health, Faculty of Health Sciences and Social Work, Trnava  
726 University, Trnava, Slovakia  
727 <sup>21</sup>Qesgen Systems Inc., Burlingame, California, USA  
728 <sup>22</sup>Australian & New Zealand Intensive Care Research Centre, Department of  
729 Epidemiology and Preventive Medicine, School of Public Health and Preventive Medicine,  
730 Monash University, Melbourne, Australia  
731 <sup>23</sup>Department of Surgery and Perioperative Science, Umeå University, Umeå, Sweden  
732 <sup>24</sup>Department of Neurosurgery, Medical School, University of Pécs, Hungary and  
733 Neurotrauma Research Group, János Szentágothai Research Centre, University of Pécs,  
734 Hungary  
735 <sup>25</sup>Department of Medical Psychology, Universitätsklinikum Hamburg-Eppendorf,  
736 Hamburg, Germany  
737 <sup>26</sup>Brain Physics Lab, Division of Neurosurgery, Dept of Clinical Neurosciences, University  
738 of Cambridge, Addenbrooke's Hospital, Cambridge, UK  
739 <sup>27</sup>Neuro ICU, Fondazione IRCCS Cà Granda Ospedale Maggiore Policlinico, Milan, Italy  
740 <sup>28</sup>ANZIC Research Centre, Monash University, Department of Epidemiology and  
741 Preventive Medicine, Melbourne, Victoria, Australia

- 742 <sup>29</sup>Department of Neurosurgery, Hospital of Cruces, Bilbao, Spain  
743 <sup>30</sup>NeuroIntensive Care, Niguarda Hospital, Milan, Italy  
744 <sup>31</sup>School of Medicine and Surgery, Università Milano Bicocca, Milano, Italy  
745 <sup>32</sup>NeuroIntensive Care, ASST di Monza, Monza, Italy  
746 <sup>33</sup>Department of Neurosurgery, Medical Faculty RWTH Aachen University, Aachen,  
747 Germany  
748 <sup>34</sup>Department of Anesthesiology and Intensive Care Medicine, University Hospital Bonn,  
749 Bonn, Germany  
750 <sup>35</sup>Department of Anesthesia & Neurointensive Care, Cambridge University Hospital NHS  
751 Foundation Trust, Cambridge, UK  
752 <sup>36</sup>School of Public Health & PM, Monash University and The Alfred Hospital, Melbourne,  
753 Victoria, Australia  
754 <sup>37</sup>Radiology/MRI department, MRC Cognition and Brain Sciences Unit, Cambridge, UK  
755 <sup>38</sup>Institute of Medical Psychology and Medical Sociology, Universitätsmedizin Göttingen,  
756 Göttingen, Germany  
757 <sup>39</sup>Oxford University Hospitals NHS Trust, Oxford, UK  
758 <sup>40</sup>Intensive Care Unit, CHU Poitiers, Poitiers, France  
759 <sup>41</sup>University of Manchester NIHR Biomedical Research Centre, Critical Care Directorate,  
760 Salford Royal Hospital NHS Foundation Trust, Salford, UK  
761 <sup>42</sup>Movement Science Group, Faculty of Health and Life Sciences, Oxford Brookes  
762 University, Oxford, UK  
763 <sup>43</sup>Department of Neurosurgery, Antwerp University Hospital and University of Antwerp,  
764 Edegem, Belgium  
765 <sup>44</sup>Department of Anesthesia & Intensive Care, Maggiore Della Carità Hospital, Novara,  
766 Italy  
767 <sup>45</sup>Department of Neurosurgery, University Hospitals Leuven, Leuven, Belgium  
768 <sup>46</sup>Department of Neurosurgery, Clinical centre of Vojvodina, Faculty of Medicine,  
769 University of Novi Sad, Novi Sad, Serbia  
770 <sup>47</sup>Division of Anaesthesia, University of Cambridge, Addenbrooke's Hospital, Cambridge,  
771 UK  
772 <sup>48</sup>Center for Stroke Research Berlin, Charité – Universitätsmedizin Berlin, corporate  
773 member of Freie Universität Berlin, Humboldt-Universität zu Berlin, and Berlin Institute of  
774 Health, Berlin, Germany  
775 <sup>49</sup>Intensive Care Unit, CHR Citadelle, Liège, Belgium  
776 <sup>50</sup>Department of Anaesthesiology and Intensive Therapy, University of Pécs, Pécs,  
777 Hungary  
778 <sup>51</sup>Departments of Neurology, Clinical Neurophysiology and Neuroanesthesiology, Region  
779 Hovedstaden Rigshospitalet, Copenhagen, Denmark  
780 <sup>52</sup>National Institute for Stroke and Applied Neurosciences, Faculty of Health and  
781 Environmental Studies, Auckland University of Technology, Auckland, New Zealand  
782 <sup>53</sup>Department of Neurology, Erasmus MC, Rotterdam, the Netherlands  
783 <sup>54</sup>Department of Anesthesiology and Intensive care, University Hospital Northern Norway,  
784 Tromsø, Norway  
785 <sup>55</sup>Department of Neurosurgery, Hadassah-hebrew University Medical center, Jerusalem,  
786 Israel  
787 <sup>56</sup>Fundación Instituto Valenciano de Neurorehabilitación (FIVAN), Valencia, Spain

788 <sup>57</sup>Department of Neurosurgery, Shanghai Renji hospital, Shanghai Jiaotong  
789 University/school of medicine, Shanghai, China  
790 <sup>58</sup>Karolinska Institutet, INCF International Neuroinformatics Coordinating Facility,  
791 Stockholm, Sweden  
792 <sup>59</sup>Emergency Department, CHU, Liège, Belgium  
793 <sup>60</sup>Neurosurgery clinic, Pauls Stradins Clinical University Hospital, Riga, Latvia  
794 <sup>61</sup>Department of Computing, Imperial College London, London, UK  
795 <sup>62</sup>Department of Neurosurgery, Hospital Universitario 12 de Octubre, Madrid, Spain  
796 <sup>63</sup>Department of Anesthesia, Critical Care and Pain Medicine, Medical University of  
797 Vienna, Austria  
798 <sup>64</sup>Department of Public Health, Erasmus Medical Center-University Medical Center,  
799 Rotterdam, The Netherlands  
800 <sup>65</sup>College of Health and Medicine, Australian National University, Canberra, Australia  
801 <sup>66</sup>Department of Neurosurgery, Neurosciences Centre & JPN Apex trauma centre, All  
802 India Institute of Medical Sciences, New Delhi-110029, India  
803 <sup>67</sup>Department of Neurosurgery, Erasmus MC, Rotterdam, the Netherlands  
804 <sup>68</sup>Department of Neurosurgery, Oslo University Hospital, Oslo, Norway  
805 <sup>69</sup>Division of Psychology, University of Stirling, Stirling, UK  
806 <sup>70</sup>Division of Neurosurgery, Department of Clinical Neurosciences, Addenbrooke's  
807 Hospital & University of Cambridge, Cambridge, UK  
808 <sup>71</sup>Department of Neurology, University of Groningen, University Medical Center  
809 Groningen, Groningen, Netherlands  
810 <sup>72</sup>Neurointensive Care, Sheffield Teaching Hospitals NHS Foundation Trust, Sheffield,  
811 UK  
812 <sup>73</sup>Salford Royal Hospital NHS Foundation Trust Acute Research Delivery Team, Salford,  
813 UK  
814 <sup>74</sup>Department of Intensive Care and Department of Ethics and Philosophy of Medicine,  
815 Erasmus Medical Center, Rotterdam, The Netherlands  
816 <sup>75</sup>Department of Clinical Neuroscience, Neurosurgery, Umeå University, Umeå, Sweden  
817 <sup>76</sup>Hungarian Brain Research Program - Grant No. KTIA\_13\_Not ApplicableP-A-II/8,  
818 University of Pécs, Pécs, Hungary  
819 <sup>77</sup>Department of Anaesthesiology, University Hospital of Aachen, Aachen, Germany  
820 <sup>78</sup>Cyclotron Research Center, University of Liège, Liège, Belgium  
821 <sup>79</sup>Centre for Urgent and Emergency Care Research (CURE), Health Services Research  
822 Section, School of Health and Related Research (SchARR), University of Sheffield,  
823 Sheffield, UK  
824 <sup>80</sup>Emergency Department, Salford Royal Hospital, Salford UK  
825 <sup>81</sup>Institute of Research in Operative Medicine (IFOM), Witten/Herdecke University,  
826 Cologne, Germany  
827 <sup>82</sup>VP Global Project Management CNS, ICON, Paris, France  
828 <sup>83</sup>Department of Anaesthesiology-Intensive Care, Lille University Hospital, Lille, France  
829 <sup>84</sup>Department of Neurosurgery, Rambam Medical Center, Haifa, Israel  
830 <sup>85</sup>Department of Anaesthesiology & Intensive Care, University Hospitals Southampton  
831 NHS Trust, Southampton, UK  
832 <sup>86</sup>Cologne-Merheim Medical Center (CMMC), Department of Traumatology, Orthopedic  
833 Surgery and Sportmedicine, Witten/Herdecke University, Cologne, Germany

- 834 <sup>87</sup>Intensive Care Unit, Southmead Hospital, Bristol, Bristol, UK  
835 <sup>88</sup>Department of Neurological Surgery, University of California, San Francisco, California,  
836 USA  
837 <sup>89</sup>Department of Anesthesia & Intensive Care, M. Bufalini Hospital, Cesena, Italy  
838 <sup>90</sup>Department of Neurosurgery, University Hospital Heidelberg, Heidelberg, Germany  
839 <sup>91</sup>Department of Neurosurgery, The Walton centre NHS Foundation Trust, Liverpool, UK  
840 <sup>92</sup>Department of Medical Genetics, University of Pécs, Pécs, Hungary  
841 <sup>93</sup>Department of Neurosurgery, Emergency County Hospital Timisoara, Timisoara,  
842 Romania  
843 <sup>94</sup>School of Medical Sciences, Örebro University, Örebro, Sweden  
844 <sup>95</sup>Institute for Molecular Medicine Finland, University of Helsinki, Helsinki, Finland  
845 <sup>96</sup>Analytic and Translational Genetics Unit, Department of Medicine; Psychiatric &  
846 Neurodevelopmental Genetics Unit, Department of Psychiatry; Department of Neurology,  
847 Massachusetts General Hospital, Boston, MA, USA  
848 <sup>97</sup>Program in Medical and Population Genetics; The Stanley Center for Psychiatric  
849 Research, The Broad Institute of MIT and Harvard, Cambridge, MA, USA  
850 <sup>98</sup>Department of Radiology, University of Antwerp, Edegem, Belgium  
851 <sup>99</sup>Department of Anesthesiology & Intensive Care, University Hospital of Grenoble,  
852 Grenoble, France  
853 <sup>100</sup>Department of Anesthesia & Intensive Care, Azienda Ospedaliera Università di  
854 Padova, Padova, Italy  
855 <sup>101</sup>Dept. of Neurosurgery, Leiden University Medical Center, Leiden, The Netherlands and  
856 Dept. of Neurosurgery, Medical Center Haaglanden, The Hague, The Netherlands  
857 <sup>102</sup>Department of Neurosurgery, Helsinki University Central Hospital  
858 <sup>103</sup>Division of Clinical Neurosciences, Department of Neurosurgery and Turku Brain Injury  
859 Centre, Turku University Hospital and University of Turku, Turku, Finland  
860 <sup>104</sup>Department of Anesthesiology and Critical Care, Pitié -Salpêtrière Teaching Hospital,  
861 Assistance Publique, Hôpitaux de Paris and University Pierre et Marie Curie, Paris,  
862 France  
863 <sup>105</sup>Neurotraumatology and Neurosurgery Research Unit (UNINN), Vall d'Hebron  
864 Research Institute, Barcelona, Spain  
865 <sup>106</sup>Department of Neurosurgery, Kaunas University of technology and Vilnius University,  
866 Vilnius, Lithuania  
867 <sup>107</sup>Department of Neurosurgery, Rezekne Hospital, Latvia  
868 <sup>108</sup>Department of Anaesthesia, Critical Care & Pain Medicine NHS Lothian & University  
869 of Edinburgh, Edinburgh, UK  
870 <sup>109</sup>Director, MRC Biostatistics Unit, Cambridge Institute of Public Health, Cambridge, UK  
871 <sup>110</sup>Department of Physical Medicine and Rehabilitation, Oslo University  
872 Hospital/University of Oslo, Oslo, Norway  
873 <sup>111</sup>Division of Orthopedics, Oslo University Hospital, Oslo, Norway  
874 <sup>112</sup>Institute of Clinical Medicine, Faculty of Medicine, University of Oslo, Oslo, Norway  
875 <sup>113</sup>Broad Institute, Cambridge MA Harvard Medical School, Boston MA, Massachusetts  
876 General Hospital, Boston MA, USA  
877 <sup>114</sup>National Trauma Research Institute, The Alfred Hospital, Monash University,  
878 Melbourne, Victoria, Australia  
879 <sup>115</sup>Department of Neurosurgery, Odense University Hospital, Odense, Denmark

880 <sup>116</sup>International Neurotrauma Research Organisation, Vienna, Austria  
881 <sup>117</sup>Klinik für Neurochirurgie, Klinikum Ludwigsburg, Ludwigsburg, Germany  
882 <sup>118</sup>Division of Biostatistics and Epidemiology, Department of Preventive Medicine,  
883 University of Debrecen, Debrecen, Hungary  
884 <sup>119</sup>Department Health and Prevention, University Greifswald, Greifswald, Germany  
885 <sup>120</sup>Department of Anaesthesiology and Intensive Care, AUVA Trauma Hospital, Salzburg,  
886 Austria  
887 <sup>121</sup>Department of Neurology, Elisabeth-TweeSteden Ziekenhuis, Tilburg, the Netherlands  
888 <sup>122</sup>Department of Neuroanesthesia and Neurointensive Care, Odense University Hospital,  
889 Odense, Denmark  
890 <sup>123</sup>Department of Neuromedicine and Movement Science, Norwegian University of  
891 Science and Technology, NTNU, Trondheim, Norway  
892 <sup>124</sup>Department of Physical Medicine and Rehabilitation, St.Olavs Hospital, Trondheim  
893 University Hospital, Trondheim, Norway  
894 <sup>125</sup>Department of Neurosurgery, University of Pécs, Pécs, Hungary  
895 <sup>126</sup>Division of Neuroscience Critical Care, Johns Hopkins University School of Medicine,  
896 Baltimore, USA  
897 <sup>127</sup>Department of Neuropathology, Queen Elizabeth University Hospital and University of  
898 Glasgow, Glasgow, UK  
899 <sup>128</sup>Dept. of Department of Biomedical Data Sciences, Leiden University Medical Center,  
900 Leiden, The Netherlands  
901 <sup>129</sup>Department of Pathophysiology and Transplantation, Milan University, and  
902 Neuroscience ICU, Fondazione IRCCS Cà Granda Ospedale Maggiore Policlinico,  
903 Milano, Italy  
904 <sup>130</sup>Department of Radiation Sciences, Biomedical Engineering, Umeå University, Umeå,  
905 Sweden  
906 <sup>131</sup>Perioperative Services, Intensive Care Medicine and Pain Management, Turku  
907 University Hospital and University of Turku, Turku, Finland  
908 <sup>132</sup>Department of Neurosurgery, Kaunas University of Health Sciences, Kaunas, Lithuania  
909 <sup>133</sup>Intensive Care and Department of Pediatric Surgery, Erasmus Medical Center, Sophia  
910 Children's Hospital, Rotterdam, The Netherlands  
911 <sup>134</sup>Department of Neurosurgery, Kings college London, London, UK  
912 <sup>135</sup>Neurologie, Neurochirurgie und Psychiatrie, Charité – Universitätsmedizin Berlin,  
913 Berlin, Germany  
914 <sup>136</sup>Department of Intensive Care Adults, Erasmus MC– University Medical Center  
915 Rotterdam, Rotterdam, the Netherlands  
916 <sup>137</sup>icoMetrix NV, Leuven, Belgium  
917 <sup>138</sup>Movement Science Group, Faculty of Health and Life Sciences, Oxford Brookes  
918 University, Oxford, UK  
919 <sup>139</sup>Psychology Department, Antwerp University Hospital, Edegem, Belgium  
920 <sup>140</sup>Director of Neurocritical Care, University of California, Los Angeles, USA  
921 <sup>141</sup>Department of Neurosurgery, St.Olavs Hospital, Trondheim University Hospital,  
922 Trondheim, Norway  
923 <sup>142</sup>Department of Emergency Medicine, University of Florida, Gainesville, Florida, USA

924 <sup>143</sup>Department of Neurosurgery, Charité – Universitätsmedizin Berlin, corporate member  
925 of Freie Universität Berlin, Humboldt-Universität zu Berlin, and Berlin Institute of Health,  
926 Berlin, Germany

927 <sup>144</sup>VTT Technical Research Centre, Tampere, Finland

928 <sup>145</sup>Section of Neurosurgery, Department of Surgery, Rady Faculty of Health Sciences,  
929 University of Manitoba, Winnipeg, MB, Canada

930

931 \*Co-lead investigators: [andrew.maas@uza.be](mailto:andrew.maas@uza.be) (AIRM) and [dkm13@cam.ac.uk](mailto:dkm13@cam.ac.uk) (DM)

932

## 933 **References**

934

935 1. Stocchetti N, Maas AIR. Traumatic Intracranial Hypertension. *N Engl J Med*  
936 2014;370(22):2121–2130; doi: 10.1056/NEJMra1208708.

937 2. Meyfroidt G, Bouzat P, Casaer MP, et al. Management of moderate to severe  
938 traumatic brain injury: an update for the intensivist. *Intensive Care Med*  
939 2022;48(6):649–666; doi: 10.1007/s00134-022-06702-4.

940 3. Menon DK, Ercole A. Chapter 14 - Critical care management of traumatic brain injury.  
941 Wijdicks EFM, Kramer AH. eds. *Handb Clin Neurol* 2017;140(Journal Article):239–  
942 274; doi: 10.1016/B978-0-444-63600-3.00014-3.

943 4. Stocchetti N, Carbonara M, Citerio G, et al. Severe traumatic brain injury: targeted  
944 management in the intensive care unit. *Lancet Neurol* 2017;16(6):452–464; doi:  
945 10.1016/S1474-4422(17)30118-7.

946 5. Hawryluk GWJ, Aguilera S, Buki A, et al. A management algorithm for patients with  
947 intracranial pressure monitoring: the Seattle International Severe Traumatic Brain  
948 Injury Consensus Conference (SIBICC). *Intensive Care Med* 2019;45(12):1783–  
949 1794; doi: 10.1007/s00134-019-05805-9.

950 6. Maset AL, Marmarou A, Ward JD, et al. Pressure-volume index in head injury. *J*  
951 *Neurosurg* 1987;67(6):832–840; doi: 10.3171/jns.1987.67.6.0832.

952 7. Shore PM, Hand LL, Roy L, et al. Reliability and validity of the Pediatric Intensity  
953 Level of Therapy (PILOT) scale: A measure of the use of intracranial pressure–  
954 directed therapies. *Crit Care Med* 2006;34(7):1981; doi:  
955 10.1097/01.CCM.0000220765.22184.ED.

956 8. Maas AIR, Harrison-Felix CL, Menon D, et al. Standardizing Data Collection in  
957 Traumatic Brain Injury. *J Neurotrauma* 2011;28(2):177–187; doi:  
958 10.1089/neu.2010.1617.

959 9. Zuercher P, Groen JL, Aries MJH, et al. Reliability and Validity of the Therapy  
960 Intensity Level Scale: Analysis of Clinimetric Properties of a Novel Approach to  
961 Assess Management of Intracranial Pressure in Traumatic Brain Injury. *J*  
962 *Neurotrauma* 2016;33(19):1768–1774; doi: 10.1089/neu.2015.4266.

- 963 10. Robba C, Graziano F, Guglielmi A, et al. Treatments for intracranial hypertension  
964 in acute brain-injured patients: grading, timing, and association with outcome. Data  
965 from the SYNAPSE-ICU study. *Intensive Care Med* 2023;49(1):50–61; doi:  
966 10.1007/s00134-022-06937-1.
- 967 11. Huijben JA, Wiegers EJA, Lingsma HF, et al. Changing care pathways and  
968 between-center practice variations in intensive care for traumatic brain injury across  
969 Europe: a CENTER-TBI analysis. *Intensive Care Med* 2020;46(5):995–1004; doi:  
970 10.1007/s00134-020-05965-z.
- 971 12. Huijben JA, Dixit A, Stocchetti N, et al. Use and impact of high intensity  
972 treatments in patients with traumatic brain injury across Europe: a CENTER-TBI  
973 analysis. *Crit Care* 2021;25(1):78; doi: 10.1186/s13054-020-03370-y.
- 974 13. Bhattacharyay S, Caruso PF, Åkerlund C, et al. Contribution of Clinical Course to  
975 Outcome after Traumatic Brain Injury: Mining Patient Trajectories from European  
976 Intensive Care Unit Data. 2023; doi: 10.48550/arXiv.2303.04630.
- 977 14. Zoerle T, Birg T, Carbonara M, et al. Accuracy of Manual Intracranial Pressure  
978 Recording Compared to a Computerized High-Resolution System: A CENTER-TBI  
979 Analysis. *Neurocrit Care* 2023; doi: 10.1007/s12028-023-01697-2.
- 980 15. Maas AIR, Menon DK, Manley GT, et al. Traumatic brain injury: progress and  
981 challenges in prevention, clinical care, and research. *Lancet Neurol*  
982 2022;21(11):1004–1060; doi: 10.1016/S1474-4422(22)00309-X.
- 983 16. Clossen MC, Huijben JA, van der Jagt M, et al. Variation in monitoring and  
984 treatment policies for intracranial hypertension in traumatic brain injury: a survey in 66  
985 neurotrauma centers participating in the CENTER-TBI study. *Crit Care*  
986 2017;21(1):233; doi: 10.1186/s13054-017-1816-9.
- 987 17. Avila ML, Stinson J, Kiss A, et al. A critical review of scoring options for clinical  
988 measurement tools. *BMC Res Notes* 2015;8(1):612; doi: 10.1186/s13104-015-1561-  
989 6.
- 990 18. Maas AIR, Menon DK, Steyerberg EW, et al. Collaborative European  
991 NeuroTrauma Effectiveness Research in Traumatic Brain Injury (CENTER-TBI): A  
992 Prospective Longitudinal Observational Study. *Neurosurgery* 2015;76(1):67–80; doi:  
993 10.1227/NEU.0000000000000575.
- 994 19. Steyerberg EW, Wiegers E, Sewalt C, et al. Case-mix, care pathways, and  
995 outcomes in patients with traumatic brain injury in CENTER-TBI: a European  
996 prospective, multicentre, longitudinal, cohort study. *Lancet Neurol* 2019;18(10):923–  
997 934; doi: 10.1016/S1474-4422(19)30232-7.
- 998 20. Doiron D, Marcon Y, Fortier I, et al. Software Application Profile: Opal and Mica:  
999 open-source software solutions for epidemiological data management, harmonization  
1000 and dissemination. *Int J Epidemiol* 2017;46(5):1372–1378; doi: 10.1093/ije/dyx180.

- 1001 21. Zeiler FA, Ercole A, Cabeleira M, et al. Patient-specific ICP Epidemiologic  
1002 Thresholds in Adult Traumatic Brain Injury: A CENTER-TBI Validation Study. *J*  
1003 *Neurosurg Anesthesiol* 2021;33(1):28–38; doi: 10.1097/ANA.0000000000000616.
- 1004 22. Marshall LF, Marshall SB, Klauber MR, et al. The diagnosis of head injury  
1005 requires a classification based on computed axial tomography. *J Neurotrauma* 1992;9  
1006 Suppl 1:S287-292.
- 1007 23. Teasdale G, Maas A, Lecky F, et al. The Glasgow Coma Scale at 40 years:  
1008 standing the test of time. *The LancetNeurology* 2014;13(8):844–854; doi:  
1009 10.1016/S1474-4422(14)70120-6.
- 1010 24. Ercole A, Dixit A, Nelson DW, et al. Imputation strategies for missing baseline  
1011 neurological assessment covariates after traumatic brain injury: A CENTER-TBI  
1012 study. *PLoS ONE* 2021;16(8):e0253425.
- 1013 25. McMillan T, Wilson L, Ponsford J, et al. The Glasgow Outcome Scale - 40 years  
1014 of application and refinement. *Nat Rev Neurol* 2016;12(8):477–485; doi:  
1015 10.1038/nrneurol.2016.89.
- 1016 26. Kunzmann K, Wernisch L, Richardson S, et al. Imputation of Ordinal Outcomes:  
1017 A Comparison of Approaches in Traumatic Brain Injury. *J Neurotrauma*  
1018 2021;38(4):455–463; doi: 10.1089/neu.2019.6858.
- 1019 27. Bhattacharyay S, Milosevic I, Wilson L, et al. The leap to ordinal: Detailed  
1020 functional prognosis after traumatic brain injury with a flexible modelling approach.  
1021 *PLoS ONE* 2022;17(7):e0270973; doi: 10.1371/journal.pone.0270973.
- 1022 28. Boateng GO, Neilands TB, Frongillo EA, et al. Best Practices for Developing and  
1023 Validating Scales for Health, Social, and Behavioral Research: A Primer. *Front Public*  
1024 *Health* 2018;6:149; doi: 10.3389/fpubh.2018.00149.
- 1025 29. Bakdash JZ, Marusich LR. Repeated Measures Correlation. *Front Psychol*  
1026 2017;8:456; doi: 10.3389/fpsyg.2017.00456.
- 1027 30. van Buuren S, Groothuis-Oudshoorn CGM. mice: Multivariate Imputation by  
1028 Chained Equations in R. *J Stat Softw* 2011;45(3):1–67; doi: 10.18637/jss.v045.i03.
- 1029 31. Gravesteijn BY, Sewalt CA, Venema E, et al. Missing Data in Prediction  
1030 Research: A Five-Step Approach for Multiple Imputation, Illustrated in the CENTER-  
1031 TBI Study. *J Neurotrauma* 2021;38(13):1842–1857; doi: 10.1089/neu.2020.7218.
- 1032 32. Honaker J King, G, Blackwell, M. Amelia II: A Program for Missing Data. *J Stat*  
1033 *Softw* 2011;45(7); doi: 10.18637/jss.v045.i07.
- 1034 33. Beqiri E, Smielewski P, Robba C, et al. Feasibility of individualised severe  
1035 traumatic brain injury management using an automated assessment of optimal



- 1036 cerebral perfusion pressure: the COGiTATE phase II study protocol. *BMJ Open*  
1037 2019;9(9):e030727; doi: 10.1136/bmjopen-2019-030727.
- 1038 34. Tas J, Beqiri E, van Kaam RC, et al. Targeting Autoregulation-Guided Cerebral  
1039 Perfusion Pressure after Traumatic Brain Injury (COGiTATE): A Feasibility  
1040 Randomized Controlled Clinical Trial. *J Neurotrauma* 2021;38(20):2790–2800; doi:  
1041 10.1089/neu.2021.0197.
- 1042 35. Schreiber JB. Issues and recommendations for exploratory factor analysis and  
1043 principal component analysis. *Res Soc Adm Pharm* 2021;17(5):1004–1011; doi:  
1044 10.1016/j.sapharm.2020.07.027.
- 1045 36. Clark D, Joannides A, Adeleye AO, et al. Casemix, management, and mortality of  
1046 patients receiving emergency neurosurgery for traumatic brain injury in the Global  
1047 Neurotrauma Outcomes Study: a prospective observational cohort study. *Lancet*  
1048 *Neurol* 2022;21(5):438–449; doi: 10.1016/S1474-4422(22)00037-0.
- 1049 37. Hutchinson PJ, Koliass AG, Timofeev IS, et al. Trial of Decompressive  
1050 Craniectomy for Traumatic Intracranial Hypertension. *N Engl J Med*  
1051 2016;375(12):1119–1130; doi: 10.1056/NEJMoa1605215.
- 1052

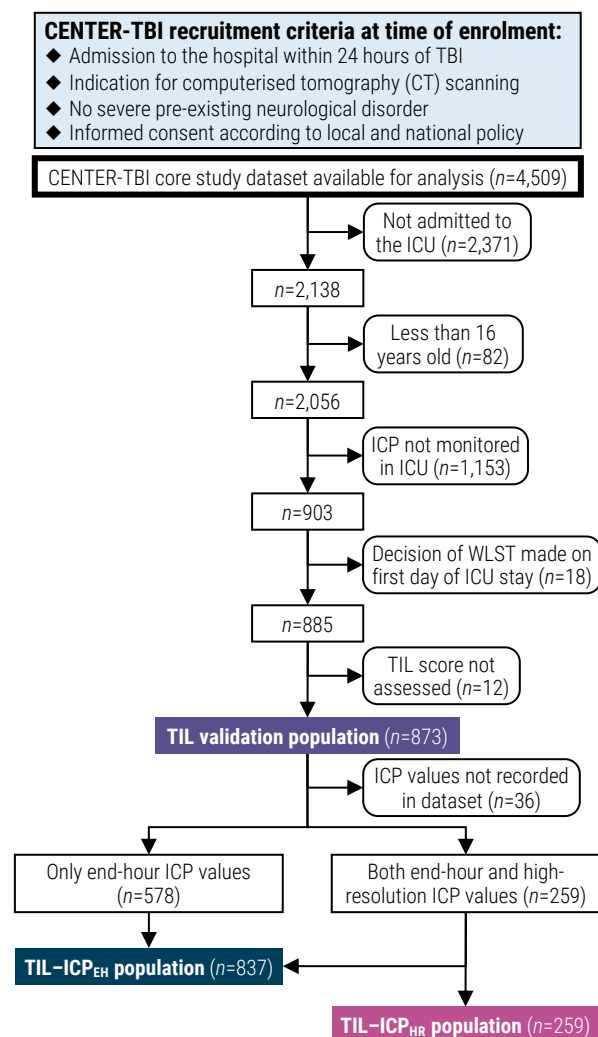

**Fig. 1. Flow diagram for patient enrolment and validation population assignment.** Abbreviations: CENTER-TBI=Collaborative European NeuroTrauma Effectiveness Research in TBI, ICP=intracranial pressure, ICP<sub>EH</sub>=end-hour ICP, ICP<sub>HR</sub>=high-resolution ICP, ICU=intensive care unit, TBI=traumatic brain injury, TIL=Therapy Intensity Level scale,<sup>8,9</sup> WLST=withdrawal of life-sustaining therapies.

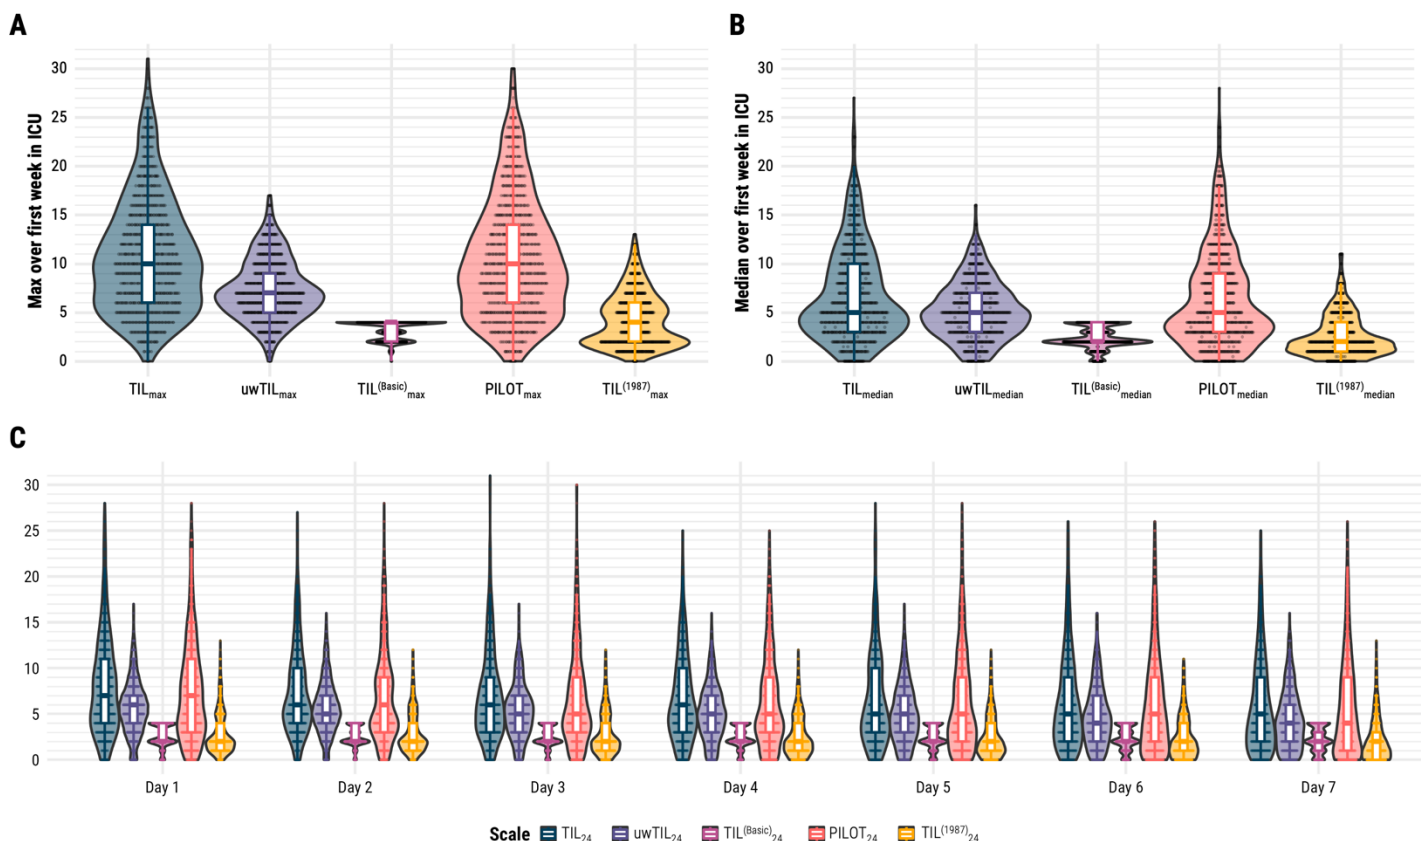

**Fig. 2. Distributions of TIL and alternative scales.** Abbreviations: ICU=intensive care unit, PILOT=Paediatric Intensity Level of Therapy scale,<sup>7</sup> TIL=Therapy Intensity Level scale,<sup>8,9</sup> TIL<sup>(1987)</sup>=original Therapy Intensity Level scale published in 1987,<sup>6</sup> TIL<sup>(Basic)</sup>=condensed TIL scale,<sup>8</sup> uwTIL=unweighted TIL scale in which sub-item scores are replaced by the ascending rank index within the item. The numeric definition of each scale is listed in Table 1. **(A)** Distributions of maximum scores of TIL (i.e., TIL<sub>max</sub>) and alternative scales (i.e., uwTIL<sub>max</sub>, TIL<sup>(Basic)</sup><sub>max</sub>, PILOT<sub>max</sub>, and TIL<sup>(1987)</sup><sub>max</sub>) over the first week of ICU stay. **(B)** Distribution of median scores of TIL (i.e., TIL<sub>median</sub>) and alternative scales (i.e., uwTIL<sub>median</sub>, TIL<sup>(Basic)</sup><sub>median</sub>, PILOT<sub>median</sub>, and TIL<sup>(1987)</sup><sub>median</sub>) over the first week of ICU stay. **(C)** Distributions of daily scores of TIL (i.e., TIL<sub>24</sub>) and alternative scales (i.e., uwTIL<sub>24</sub>, TIL<sup>(Basic)</sup><sub>24</sub>, PILOT<sub>24</sub>, and TIL<sup>(1987)</sup><sub>24</sub>) over the first week of ICU stay.

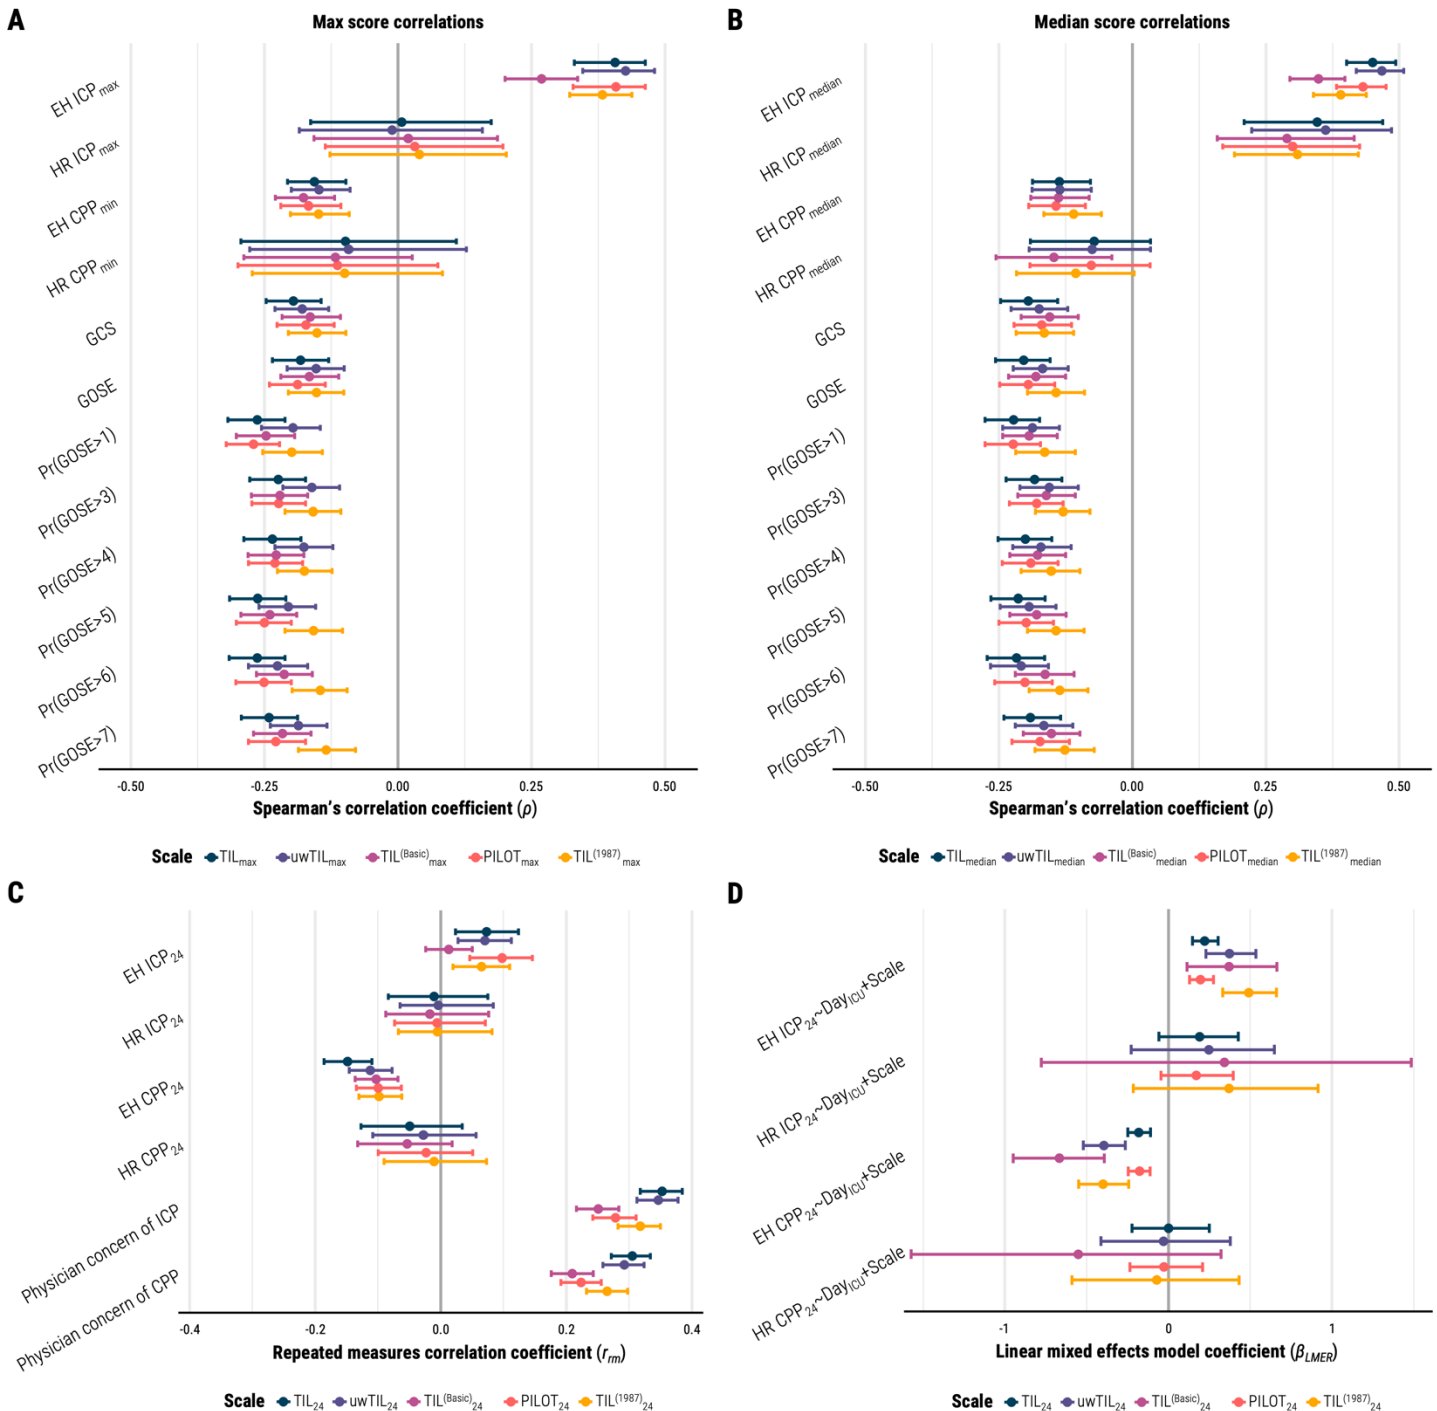

**Fig. 3. Associations of TIL and alternative scales with other clinical measures.**

Abbreviations: Day<sub>ICU</sub>=variable representing day (from 1 to 7) of ICU stay, EH=end-hour, CPP=cerebral perfusion pressure, GCS=Glasgow Coma Scale at ICU admission, GOSE=Glasgow Outcome Scale–Extended at six months post-injury, HR=high-resolution, ICP=intracranial pressure, ICU=intensive care unit, PILOT=Paediatric Intensity Level of Therapy scale,<sup>7</sup> Pr(GOSE>●)="probability of GOSE greater than ● at six months post-injury" as previously calculated from the first 24 hours of admission,<sup>27</sup> TIL=Therapy Intensity Level scale,<sup>8,9</sup> TIL<sup>(1987)</sup>=original Therapy Intensity Level scale published in 1987,<sup>6</sup> TIL<sup>(Basic)</sup>=condensed TIL scale,<sup>8</sup> uwTIL=unweighted TIL scale in which sub-item scores are replaced by the ascending rank index

within the item. The numeric definition of each scale is listed in Table 1, and the calculation of daily (e.g.,  $TIL_{24}$ ), maximum (e.g.,  $TIL_{max}$ ), and median (e.g.,  $TIL_{median}$ ) scores are described in the Methods. The bars represent 95% confidence intervals derived from bootstrapping with 1,000 resamples of unique patients over 100 missing value imputations. **(A)** Spearman's correlation coefficients ( $\rho$ ) between maximum scale scores over first week of ICU stay (i.e.,  $TIL_{max}$ ,  $uwTIL_{max}$ ,  $TIL^{(Basic)}_{max}$ ,  $PILOT_{max}$ , and  $TIL^{(1987)}_{max}$ ) and other clinical measures. **(B)** Spearman's correlation coefficients ( $\rho$ ) between median scale scores over first week of ICU stay (i.e.,  $TIL_{median}$ ,  $uwTIL_{median}$ ,  $TIL^{(Basic)}_{median}$ ,  $PILOT_{median}$ , and  $TIL^{(1987)}_{median}$ ) and other clinical measures. **(C)** Repeated measures correlation coefficients ( $r_m$ , from -1 to 1) are interpreted as the strength and direction of association between two variables after accounting for inter-patient variation. **(D)** Linear mixed effects model coefficients ( $\beta_{LMER}$ ) are interpreted as the expected difference in dependent variable (e.g., EH ICP<sub>24</sub>) per unit increase of daily scale score (e.g.,  $TIL_{24}$ ) after accounting for time since ICU admission (i.e.,  $Day_{ICU}$ ) and inter-patient variation.

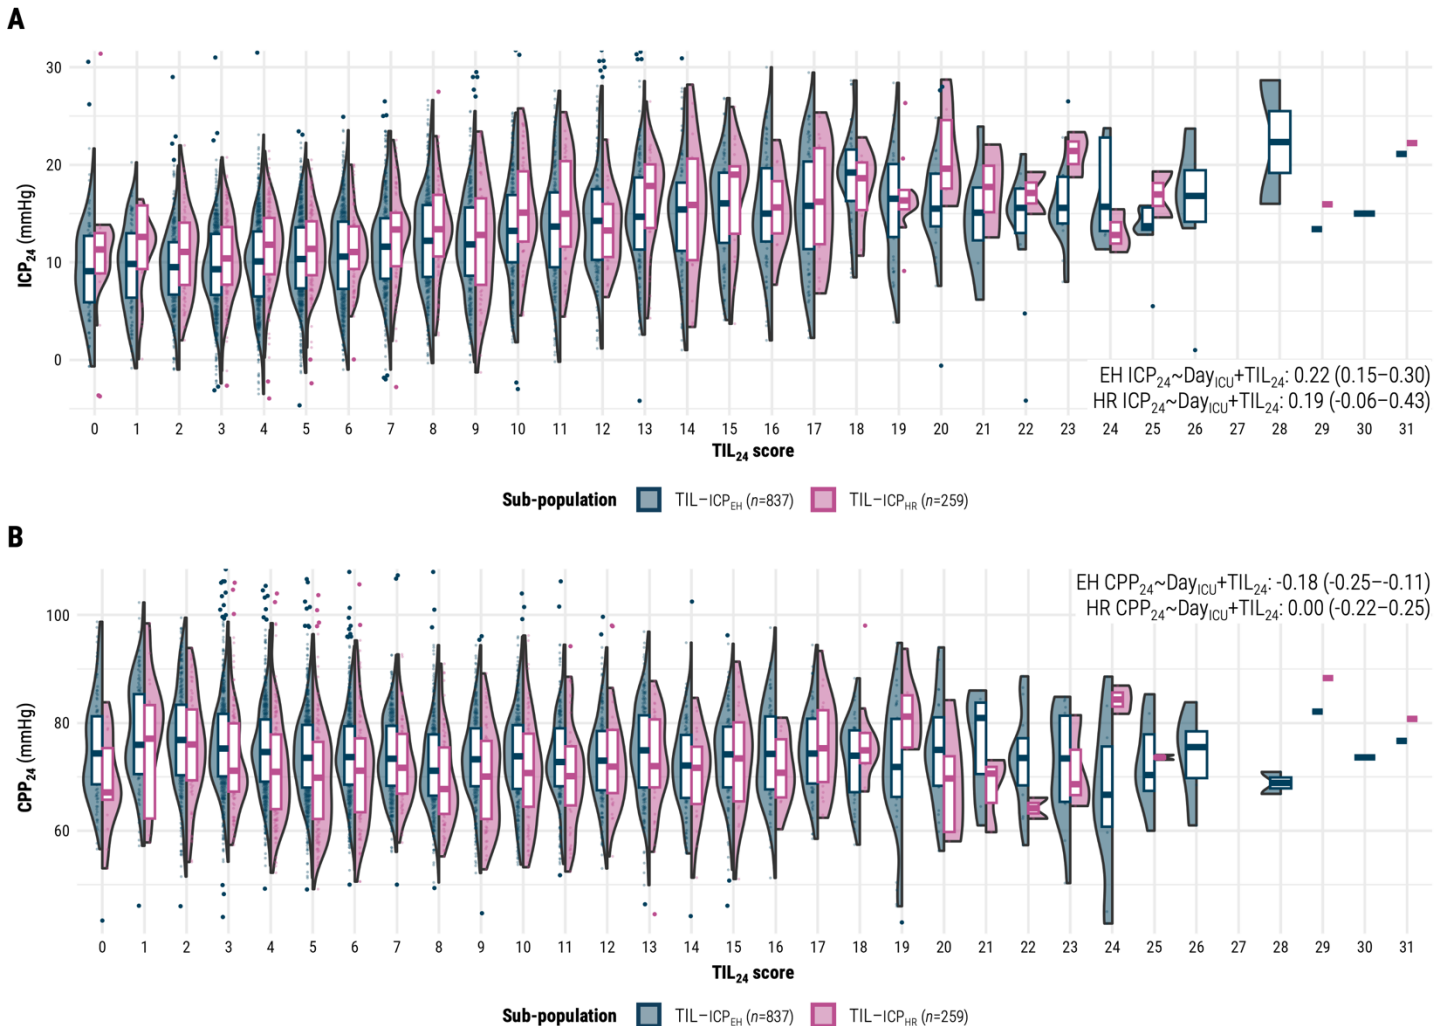

**Fig 4. Distributions of daily intracranial pressure and cerebral perfusion pressure means per daily TIL score.** Abbreviations: CPP=cerebral perfusion pressure, CPP<sub>24</sub>=mean CPP over calendar day, Day<sub>ICU</sub>=variable representing day (from 1 to 7) of ICU stay, EH=end-hour, HR=high-resolution, ICP=intracranial pressure, ICP<sub>24</sub>=mean ICP over calendar day, TIL=Therapy Intensity Level scale,<sup>8,9</sup> TIL<sub>24</sub>=TIL score of calendar day, TIL-ICP<sub>EH</sub>=end-hour ICP sub-population, TIL-ICP<sub>HR</sub>=high-resolution ICP sub-population. The values in each panel are the linear mixed effects model coefficients ( $\beta_{LMER}$ ) of TIL<sub>24</sub> with 95% confidence intervals derived from bootstrapping with 1,000 resamples of unique patients over 100 missing value imputations. The width of violin plots is scaled for each population, but the width of the points inside them demonstrates relative frequency across the populations. The violin plots do not encompass outliers based on 1.5 times the interquartile range. **(A)** Distributions of ICP<sub>24</sub> vs. TIL<sub>24</sub> for both sub-populations. **(B)** Distributions of CPP<sub>24</sub> vs. TIL<sub>24</sub> for both sub-populations.

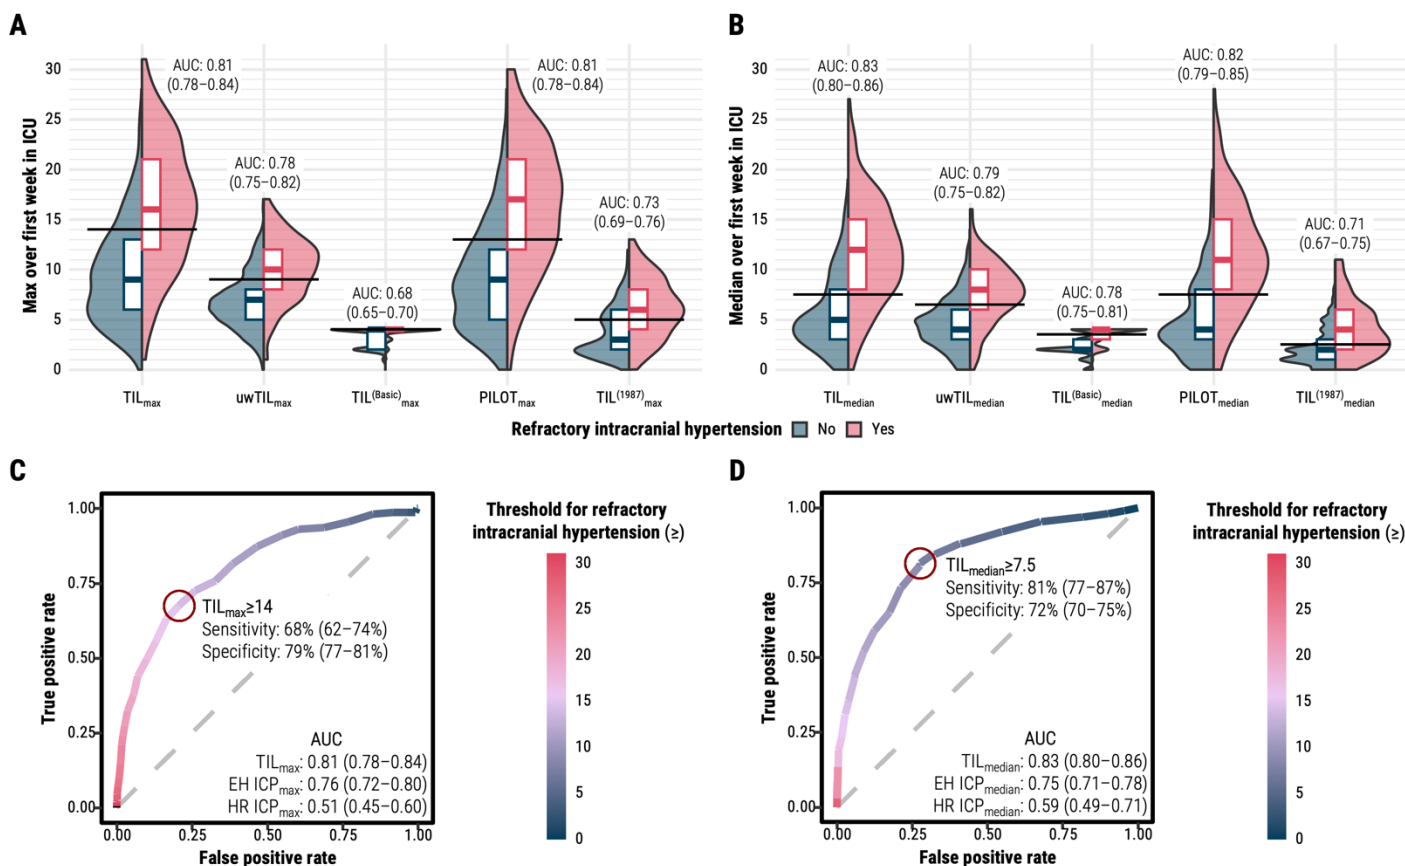

**Fig 5. Discrimination of refractory intracranial hypertension status by TIL and alternative scale summary scores.** Abbreviations: AUC=area under the receiver operating characteristic curve, EH=end-hour, HR=high-resolution, ICP=intracranial pressure, ICP<sub>max</sub>=maximum calendar day mean of ICP over first week of ICU stay, ICP<sub>median</sub>=median calendar day mean of ICP over first week of ICU stay, ICU=intensive care unit, PILOT=Paediatric Intensity Level of Therapy scale,<sup>7</sup> TIL=Therapy Intensity Level scale,<sup>8,9</sup> TIL<sup>(1987)</sup>=original Therapy Intensity Level scale published in 1987,<sup>6</sup> TIL<sup>(Basic)</sup>=condensed TIL scale,<sup>8</sup> uwTIL=unweighted TIL scale in which sub-item scores are replaced by the ascending rank index within the item. The 95% confidence intervals of AUC were derived from bootstrapping with 1,000 resamples of unique patients over 100 missing value imputations. **(A)** Distributions of maximum scores of TIL (i.e., TIL<sub>max</sub>) and alternative scales (i.e., uwTIL<sub>max</sub>, TIL<sup>(Basic)</sup><sub>max</sub>, PILOT<sub>max</sub>, and TIL<sup>(1987)</sup><sub>max</sub>) stratified by refractory intracranial hypertension status. The horizontal black line segments represent the thresholds which maximised the sum of sensitivity and specificity for each scale. **(B)** Distributions of median scores of TIL (i.e., TIL<sub>median</sub>) and alternative scales (i.e., uwTIL<sub>median</sub>, TIL<sup>(Basic)</sup><sub>median</sub>, PILOT<sub>median</sub>, and TIL<sup>(1987)</sup><sub>median</sub>) stratified by refractory intracranial hypertension status. The horizontal black line segments represent the thresholds which maximised the sum of sensitivity and specificity for each scale. **(C)** Receiver operating characteristic curve of refractory intracranial hypertension detection with TIL<sub>max</sub>. The threshold which maximised the sum of sensitivity and specificity is highlighted with the dark red circle. **(D)** Receiver operating characteristic curve of refractory intracranial hypertension detection with TIL<sub>median</sub>. The threshold which maximised the sum of sensitivity and specificity is highlighted with the dark red circle.

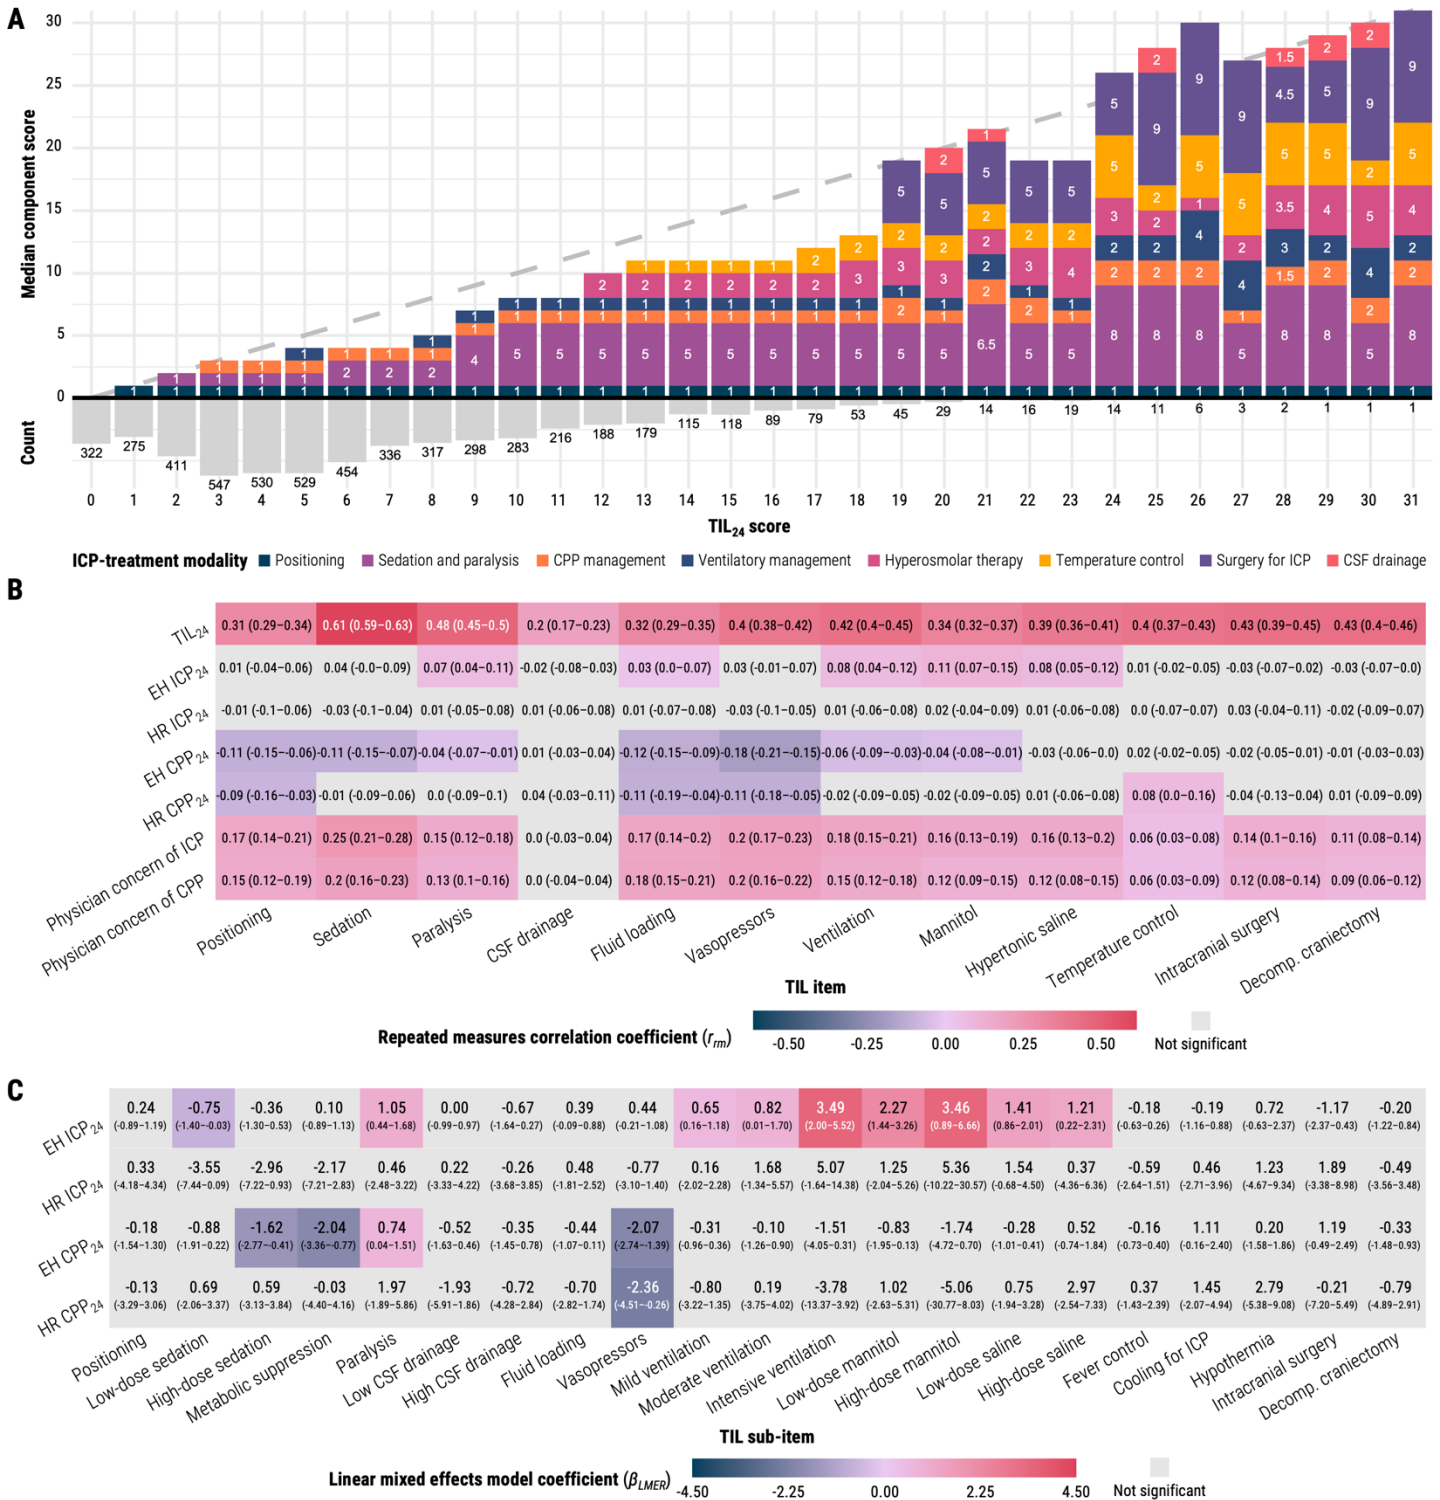

**Fig 6. Association of TIL component items with TIL<sub>24</sub> and other study measures.** Abbreviations: CPP=cerebral perfusion pressure, CPP<sub>24</sub>=mean CPP over calendar day, CSF=cerebrospinal fluid, EH=end-hour, HR=high-resolution, ICP=intracranial pressure, ICP<sub>24</sub>=mean ICP over calendar day, ICU=intensive care unit, TIL=Therapy Intensity Level scale,<sup>8,9</sup> TIL<sub>24</sub>=TIL score of calendar day. The 95% confidence intervals of  $r_{m}$  and  $\beta_{LMER}$  values were derived from bootstrapping with 1,000 resamples of unique patients over 100 missing value



imputations. **(A)** Median component score of each ICP-treatment modality (Table 1) per each TIL<sub>24</sub> score. The histogram under the x-axis represents the relative frequency and count of each TIL<sub>24</sub> score in the population, and diagonal dashed line represents the TIL<sub>24</sub> score on both axes. If the sum of median item scores does not equal the corresponding TIL<sub>24</sub> score, this can be interpreted as high variability in the combination of simultaneously applied therapies at that TIL<sub>24</sub> score. **(B)** The repeated measures correlation coefficients ( $r_{rm}$ , from -1 to 1) are interpreted as the strength and direction of association between two variables after accounting for inter-patient variation. The component score of each item (Table 1, x-axis) was subtracted from the TIL<sub>24</sub> score (top row on y-axis) before calculating their  $r_{rm}$  values. **(C)** Linear mixed effects model coefficients ( $\beta_{LMER}$ ) are interpreted as the expected difference in the dependent variable (y-axis) associated with the given TIL<sub>24</sub> sub-item treatment (Table 1) after accounting for all other TIL<sub>24</sub> sub-items, time since ICU admission, and inter-patient variation.

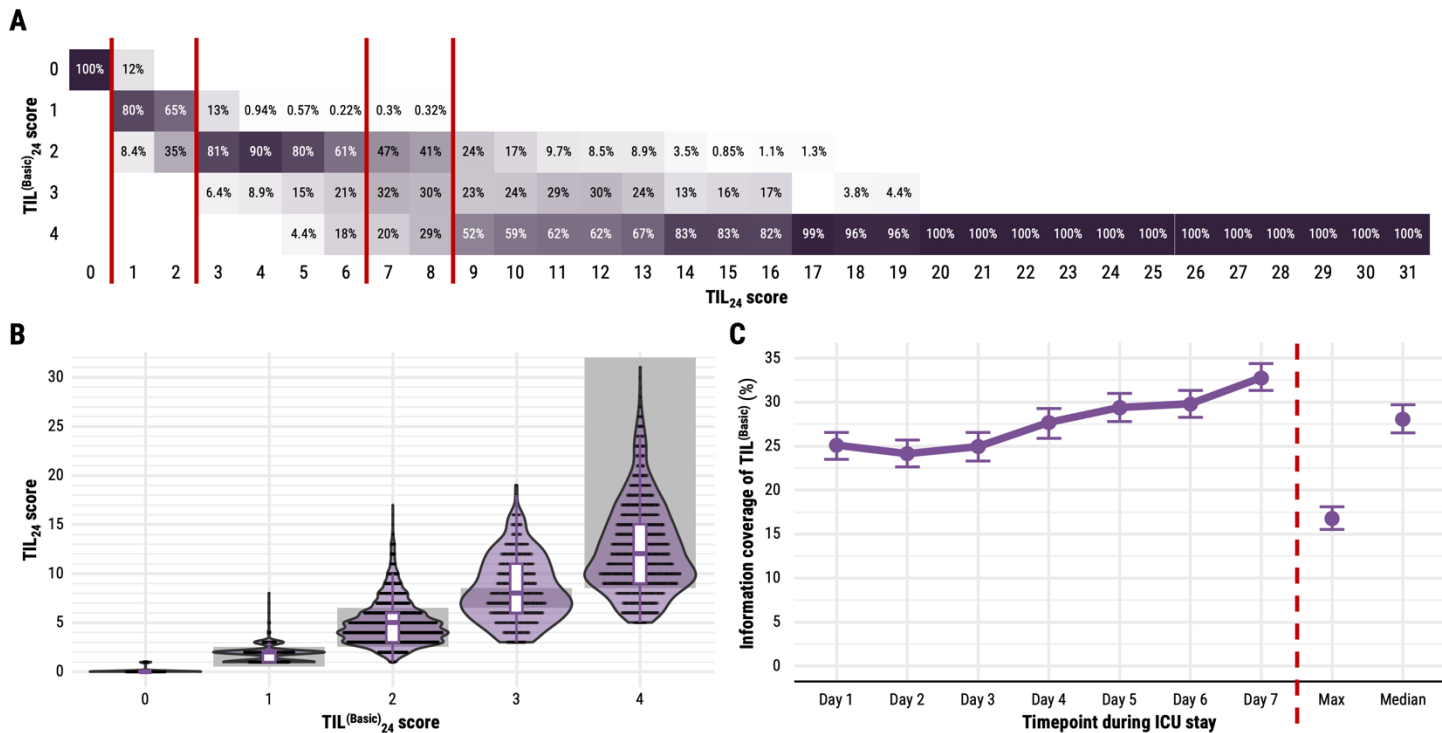

**Fig 7. Relationship between TIL and TIL<sup>(Basic)</sup>.** Abbreviations: AUC=area under the receiver operating characteristic curve, ICU=intensive care unit, TIL=Therapy Intensity Level scale,<sup>8,9</sup> TIL<sup>(Basic)</sup>=condensed TIL scale.<sup>8</sup> The numeric definition of each scale is listed in Table 1, and the calculation of daily (e.g., TIL<sub>24</sub>), maximum (e.g., TIL<sub>max</sub>), and median (e.g., TIL<sub>median</sub>) scores are described in the Methods. The 95% confidence intervals of information coverage were derived from bootstrapping with 1,000 resamples of unique patients over 100 missing value imputations. **(A)** Distribution of corresponding TIL<sup>(Basic)</sup><sub>24</sub> scores per each TIL<sub>24</sub> score. The values in each cell represent the percent of assessments at a given TIL<sub>24</sub> score (i.e., column) corresponding to a TIL<sup>(Basic)</sup><sub>24</sub> score (i.e., row). The vertical, dark red lines represent cut-offs across which the median corresponding TIL<sup>(Basic)</sup><sub>24</sub> score per TIL<sub>24</sub> score changes. **(B)** Distribution of corresponding TIL<sub>24</sub> scores per each TIL<sup>(Basic)</sup><sub>24</sub> score. The width of violin plots is scaled for each TIL<sup>(Basic)</sup><sub>24</sub> score, but the width of the points inside them demonstrates relative frequency across the TIL<sup>(Basic)</sup><sub>24</sub> scores. The grey, shaded zones represent the range of TIL<sub>24</sub> scores with corresponding median TIL<sup>(Basic)</sup><sub>24</sub> scores on the x-axis, as determined in panel (A). **(C)** The information of TIL<sub>24</sub>, TIL<sub>max</sub>, and TIL<sub>median</sub> covered by TIL<sup>(Basic)</sup><sub>24</sub>, TIL<sup>(Basic)</sup><sub>max</sub>, and TIL<sup>(Basic)</sup><sub>median</sub>, respectively. Information coverage is defined as the mutual information of TIL<sub>24</sub> and TIL<sup>(Basic)</sup><sub>24</sub> (or TIL<sub>max</sub> and TIL<sup>(Basic)</sup><sub>max</sub> or TIL<sub>median</sub> and TIL<sup>(Basic)</sup><sub>median</sub>) divided by the entropy of TIL<sub>24</sub> (or TIL<sub>max</sub> or TIL<sub>median</sub>).

**Table 1. Scoring configurations for TIL and alternative scales**

| ICP-treatment modality              | Item<br>Sub-item                                                            | TIL   |     | uwTIL |     | TIL <sup>(Basic)*</sup> | PILOT <sup>†</sup> |     | TIL <sup>(1987)†</sup> |     |
|-------------------------------------|-----------------------------------------------------------------------------|-------|-----|-------|-----|-------------------------|--------------------|-----|------------------------|-----|
|                                     |                                                                             | Score | Max | Score | Max | Score*                  | Score              | Max | Score                  | Max |
| Positioning                         | Head elevation for ICP control or nursed flat (180°) for CPP management     | 1     | 1   | 1     | 1   | 1                       | –                  | –   | –                      | –   |
| Sedation and neuromuscular blockade | Sedation                                                                    |       | 5   |       | 3   |                         |                    | 5   |                        | 4   |
|                                     | Low dose sedation (as required for mechanical ventilation)                  | 1     |     | 1     |     | 1                       | 1                  |     | 1                      |     |
|                                     | Higher dose sedation for ICP control (but not aiming for burst suppression) | 2     |     | 2     |     | 2                       | 1                  |     | 1                      |     |
|                                     | High dose propofol or barbiturates for ICP control (metabolic suppression)  | 5     |     | 3     |     | 4                       | 5                  |     | 4                      |     |
|                                     | Neuromuscular blockade (paralysis)                                          | 3     | 3   | 1     | 1   | –                       | 2                  | 2   | 1                      | 1   |
| CSF drainage                        | CSF drainage volume                                                         |       | 3   |       | 2   |                         |                    | 5   |                        | 2   |
|                                     | Low (<120 ml/24h)                                                           | 2     |     | 1     |     | 2                       | 4                  |     | 1                      |     |
|                                     | High (≥120 ml/24h)                                                          | 3     |     | 2     |     | 3                       | 5                  |     | 2                      |     |
| CPP management                      | Fluid loading for maintenance of cerebral perfusion                         | 1     | 1   | 1     | 1   | 2                       | –                  | –   | –                      | –   |
|                                     | Vasopressor therapy required for management of cerebral perfusion           | 1     | 1   | 1     | 1   | 2                       | 2                  | 2   | –                      | –   |
| Ventilatory management              | Hypocapnia for ICP control (P <sub>a</sub> CO <sub>2</sub> [mmHg])          |       | 4   |       | 3   |                         |                    | 4   |                        | 2   |
|                                     | Mild (35≤P <sub>a</sub> CO <sub>2</sub> <40)                                | 1     |     | 1     |     | 2                       | 1                  |     | 1                      |     |
|                                     | Moderate (30≤P <sub>a</sub> CO <sub>2</sub> <35)                            | 2     |     | 2     |     | 3                       | 2                  |     | 1                      |     |
|                                     | Intensive (P <sub>a</sub> CO <sub>2</sub> <30)                              | 4     |     | 3     |     | 4                       | 4                  |     | 2                      |     |
| Hyperosmolar therapy                | Mannitol administration                                                     |       | 3   |       | 2   |                         |                    | 3   |                        | 6   |
|                                     | ≤2g/kg/24h                                                                  | 2     |     | 1     |     | 2                       | 2                  |     | 3                      |     |
|                                     | >2g/kg/24h                                                                  | 3     |     | 2     |     | 3                       | 3                  |     | 6                      |     |
|                                     | Hypertonic saline administration                                            |       | 3   |       | 2   |                         |                    | 3   |                        | –   |
|                                     | ≤0.3g/kg/24h                                                                | 2     |     | 1     |     | 2                       | 3                  |     | –                      |     |
|                                     | >0.3g/kg/24h                                                                | 3     |     | 2     |     | 3                       | 3                  |     | –                      |     |
| Temperature control                 | Temperature control (T [°C])                                                |       | 5   |       | 3   |                         |                    | 5   |                        | –   |
|                                     | Fever control (>38 or spontaneous <34.5)                                    | 1     |     | 1     |     |                         | 1                  |     | –                      |     |
|                                     | Cooling for ICP control (≥35)                                               | 2     |     | 2     |     | 3                       | 3                  |     | –                      |     |
|                                     | Hypothermia (<35)                                                           | 5     |     | 3     |     | 4                       | 5                  |     | –                      |     |

|                                       |                                                                                |    |   |    |   |   |    |   |    |   |   |
|---------------------------------------|--------------------------------------------------------------------------------|----|---|----|---|---|----|---|----|---|---|
| Surgery for intracranial hypertension | Intracranial operation for progressive mass lesion, NOT scheduled on admission | 4  | 4 | 1  | 1 | 4 | 4  | 4 | 4  | – | – |
|                                       | Decompressive craniectomy                                                      | 5  | 5 | 1  | 1 | 4 | 5  | 5 | 5  | – | – |
| <b>Maximum total possible score</b>   |                                                                                | 38 |   | 21 |   | 4 | 38 |   | 15 |   |   |

Abbreviations: CPP=cerebral perfusion pressure, CSF=cerebrospinal fluid, ICP=intracranial pressure,  $P_aCO_2$ =partial pressure of carbon dioxide in arterial blood, PILOT=Paediatric Intensity Level of Therapy scale,<sup>7</sup> T=body temperature in degrees Celsius, TIL=Therapy Intensity Level scale,<sup>8,9</sup> TIL<sup>(1987)</sup>=original Therapy Intensity Level scale published in 1987,<sup>6</sup> TIL<sup>(Basic)</sup>=condensed TIL scale,<sup>8</sup> uwTIL=unweighted TIL scale in which sub-item scores are replaced by the ascending rank index within the item.

The TIL scale was developed by Maas *et al.*<sup>8</sup> For each calendar day, the highest score for each item was summed to derive the TIL score.

\*TIL<sup>(Basic)</sup> is the maximum score (from 1 to 4) among all included sub-items over the calendar day.

†PILOT scale<sup>7</sup> and TIL<sup>(1987)</sup> scale<sup>6</sup> scoring configurations have been adapted with minor adjustments to fit the items of TIL with a daily assessment frequency.

**Table 2. Summary characteristics of study validation populations**

| Summary characteristic                                  | TIL validation population      |                                              |                                              | p-value <sup>‡</sup> |
|---------------------------------------------------------|--------------------------------|----------------------------------------------|----------------------------------------------|----------------------|
|                                                         | Overall<br>(n=873, 52 centres) | TIL-ICP <sub>EH</sub><br>(n=837, 51 centres) | TIL-ICP <sub>HR</sub><br>(n=259, 21 centres) |                      |
| Age [years]                                             | 47 (29–62)                     | 47 (29–62)                                   | 48 (30–62.5)                                 | 0.303                |
| Sex: Female                                             | 222 (25%)                      | 213 (25%)                                    | 55 (21%)                                     | 0.078                |
| Baseline GCS (n*=822)                                   |                                |                                              |                                              | 0.554                |
| Mild [13–15]                                            | 122 (15%)                      | 115 (15%)                                    | 38 (16%)                                     |                      |
| Moderate [9–12]                                         | 139 (17%)                      | 133 (17%)                                    | 36 (15%)                                     |                      |
| Severe [3–8]                                            | 561 (68%)                      | 539 (68%)                                    | 170 (70%)                                    |                      |
| Marshall CT (n*=710)                                    |                                |                                              |                                              | 0.278                |
| No visible pathology (I)                                | 17 (2%)                        | 16 (2%)                                      | 6 (3%)                                       |                      |
| Diffuse injury II                                       | 264 (37%)                      | 248 (36%)                                    | 75 (35%)                                     |                      |
| Diffuse injury III                                      | 93 (13%)                       | 89 (13%)                                     | 22 (10%)                                     |                      |
| Diffuse injury IV                                       | 16 (2%)                        | 16 (2%)                                      | 3 (1%)                                       |                      |
| Mass lesion (V & VI)                                    | 320 (45%)                      | 312 (46%)                                    | 107 (50%)                                    |                      |
| Six-month GOSE (n*=761)                                 |                                |                                              |                                              | 0.329                |
| (1) Death                                               | 199 (26%)                      | 195 (26%)                                    | 54 (23%)                                     |                      |
| (2 or 3) Vegetative or lower SD                         | 182 (24%)                      | 181 (25%)                                    | 63 (27%)                                     |                      |
| (4) Upper SD                                            | 70 (9%)                        | 66 (9%)                                      | 22 (9%)                                      |                      |
| (5) Lower MD                                            | 122 (16%)                      | 117 (16%)                                    | 44 (19%)                                     |                      |
| (6) Upper MD                                            | 74 (10%)                       | 71 (10%)                                     | 23 (10%)                                     |                      |
| (7) Lower GR                                            | 56 (7%)                        | 52 (7%)                                      | 14 (6%)                                      |                      |
| (8) Upper GR                                            | 58 (8%)                        | 55 (7%)                                      | 13 (6%)                                      |                      |
| Baseline functional prognosis <sup>‡</sup> [%] (n*=749) |                                |                                              |                                              |                      |
| Pr(GOSE>1)                                              | 84.7 (63.5–94.9)               | 84.1 (62.1–94.7)                             | 83.8 (66.9–94.0)                             | 0.664                |
| Pr(GOSE>3)                                              | 53.9 (29.9–76.0)               | 53.1 (29.2–75.0)                             | 52.4 (33.9–71.1)                             | 0.287                |
| Pr(GOSE>4)                                              | 39.6 (20.6–59.6)               | 38.9 (19.8–58.3)                             | 38.1 (22.6–54.6)                             | 0.154                |
| Pr(GOSE>5)                                              | 21.1 (10.2–36.8)               | 20.7 (10.0–36.0)                             | 19.3 (10.5–30.1)                             | 0.037                |
| Pr(GOSE>6)                                              | 12.4 (5.9–20.8)                | 12.0 (5.8–19.9)                              | 10.9 (5.8–17.2)                              | 0.009                |
| Pr(GOSE>7)                                              | 4.8 (2.2–9.2)                  | 4.7 (2.2–9.1)                                | 5.3 (2.2–8.5)                                | 0.415                |
| TIL <sub>max</sub>                                      | 10 (6–14)                      | 10 (6–14)                                    | 10 (6–14)                                    | 0.577                |
| TIL <sub>median</sub>                                   | 5 (3–10)                       | 5 (3–10)                                     | 5 (4–10)                                     | 0.826                |
| TIL <sub>24</sub> scores                                |                                |                                              |                                              |                      |
| Day 1 (n*=852)                                          | 7 (4–11)                       | 7 (4–11)                                     | 7 (5–10)                                     | 0.134                |
| Day 2 (n*=839)                                          | 6 (4–10)                       | 6 (4–10)                                     | 6 (4–10)                                     | 0.860                |
| Day 3 (n*=819)                                          | 6 (3–9)                        | 6 (3–9)                                      | 6 (4–9)                                      | 0.926                |
| Day 4 (n*=787)                                          | 6 (3–10)                       | 6 (3–10)                                     | 5 (4–10)                                     | 0.372                |
| Day 5 (n*=761)                                          | 5 (3–10)                       | 5 (3–10)                                     | 5 (3–10)                                     | 0.941                |
| Day 6 (n*=733)                                          | 5 (2–9)                        | 5 (2.5–9)                                    | 5 (3–10)                                     | 0.337                |
| Day 7 (n*=709)                                          | 5 (2–9)                        | 4 (2–9)                                      | 5 (2–9)                                      | 0.425                |

Abbreviations: Baseline GCS=Glasgow Coma Scale at ICU admission, from 3 to 15, GOSE=GOS–Extended, GR=good recovery, ICP=intracranial pressure, ICP<sub>EH</sub>=end-hour ICP, ICP<sub>HR</sub>=high-resolution ICP, Marshall CT=Marshall computerised tomography classification, MD=moderate disability, Pr(GOSE>•)="probability of GOSE greater than • at six months post-injury" as previously calculated from the first 24 hours of admission,<sup>27</sup> SD=severe disability, TIL=Therapy Intensity Level scale, TIL<sub>24</sub>=TIL score of calendar day in ICU, TIL<sub>max</sub>=maximum TIL<sub>24</sub> over first week of ICU stay, TIL<sub>median</sub>=median TIL<sub>24</sub> over first week of ICU stay. Data are median (IQR) for numeric characteristics and n (% of column group) for categorical characteristics, unless

otherwise indicated. Units or numerical definitions of characteristics are provided in square brackets.

\*Limited sample size of non-missing values for characteristic.

†Ordinal functional outcome prognostic scores were calculated through tokenised embedding of all clinical information in the first 24 hours of ICU stay, as described previously.<sup>27</sup>

‡*p*-values, comparing patients in TIL-ICP<sub>HR</sub> sub-population to those not in TIL-ICP<sub>HR</sub> sub-population, are derived from with Welch's *t*-test for numeric variables and  $\chi^2$  contingency table test for categorical variables.

**Table 3. Optimised ranges for TIL categorisation**

| Category                                 | Derived ranges             | Performance (95% confidence intervals) |              |              | Case counts <sup>‡</sup> |      | Previously proposed ranges <sup>§</sup> |
|------------------------------------------|----------------------------|----------------------------------------|--------------|--------------|--------------------------|------|-----------------------------------------|
|                                          |                            | Sensitivity                            | Specificity  | Accuracy     | No                       | Yes  |                                         |
| Refractory intracranial hypertension*    | TIL <sub>max</sub> ≥14     | 68% (62–74%)                           | 79% (77–81%) | 77% (75–79%) | 707                      | 157  | TIL <sub>max</sub> ≥11                  |
|                                          | TIL <sub>median</sub> ≥7.5 | 81% (77–87%)                           | 72% (70–75%) | 74% (72–76%) |                          |      | –                                       |
| Day of surgical ICP control <sup>†</sup> | TIL <sub>24</sub> ≥9       | 87% (83–91%)                           | 74% (72–76%) | 76% (74–77%) | 4916                     | 585  | –                                       |
| TIL <sup>(Basic)</sup> <sub>24</sub>     |                            |                                        |              | 72% (70–73%) |                          |      |                                         |
| (1) Basic ICU care                       | 1≤TIL <sub>24</sub> ≤2     |                                        |              |              | 4932                     | 568  | 1≤TIL <sub>24</sub> ≤3                  |
| (2) Mild                                 | 3≤TIL <sub>24</sub> ≤6     |                                        |              |              | 3294                     | 2206 | 4≤TIL <sub>24</sub> ≤7                  |
| (3) Moderate                             | 7≤TIL <sub>24</sub> ≤8     |                                        |              |              | 4709                     | 791  | 8≤TIL <sub>24</sub> ≤10                 |
| (4) Extreme                              | TIL <sub>24</sub> ≥9       |                                        |              |              | 3919                     | 1581 | TIL <sub>24</sub> ≥11                   |

Abbreviations: ICP=intracranial pressure, ICU=intensive care unit, TIL=Therapy Intensity Level scale,<sup>8,9</sup> TIL<sup>(Basic)</sup>=condensed TIL scale.<sup>8</sup> The numeric definition of each scale is listed in Table 1, and the calculation of daily (e.g., TIL<sub>24</sub>), maximum (e.g., TIL<sub>max</sub>), and median (e.g., TIL<sub>median</sub>) scores is described in the Methods. The 95% confidence intervals of performance metrics were derived from bootstrapping with 1,000 resamples of unique patients over 100 missing value imputations. \*Refractory intracranial hypertension was defined as recurrent, sustained (i.e., of at least ten minutes) increases of ICP above 20 mmHg despite medical ICP management during ICU stay. This information was recorded by attending physicians in patient discharge summaries.

<sup>†</sup>If a decompressive craniectomy was performed as a last resort for refractory intracranial hypertension, each of the days following the operation were also considered days of surgical ICP control.

<sup>‡</sup>For refractory intracranial hypertension, case counts represent the number of patients (with non-missing values) without (i.e., No) and with (i.e., Yes) refractory intracranial hypertension. For day of surgical ICP control and TIL<sup>(Basic)</sup><sub>24</sub>, case counts represent the number of non-missing TIL assessments not in (i.e., No) and in (i.e., Yes) the given category.

<sup>§</sup>Thresholds were previously proposed by the interagency panel which developed TIL based on expert opinion.<sup>8</sup>
