# The Therapy Intensity Level scale for traumatic brain injury: clinimetric assessment on neuro-monitored patients across 52 European intensive care units

Shubhayu Bhattacharyay<sup>1,2,\*</sup>, Erta Beqiri<sup>3</sup>, Patrick Zuercher<sup>4</sup>, Lindsay Wilson<sup>5</sup>, Ewout W Steyerberg<sup>6</sup>, David W Nelson<sup>7</sup>, Andrew I R Maas<sup>8,9</sup>, David K Menon<sup>1</sup>, Ari Ercole<sup>1,10</sup>, and the CENTER-TBI investigators and participants<sup>†</sup>

<sup>1</sup>Division of Anaesthesia, University of Cambridge, Cambridge, United Kingdom.

<sup>2</sup>Department of Clinical Neurosciences, University of Cambridge, Cambridge, United Kingdom.

<sup>3</sup>Brain Physics Laboratory, Division of Neurosurgery, University of Cambridge, Cambridge, United Kingdom.

<sup>4</sup>Department of Intensive Care Medicine, Inselspital, Bern University Hospital, University of Bern, Switzerland.

<sup>5</sup>Division of Psychology, University of Stirling, Stirling, United Kingdom.

<sup>6</sup>Department of Biomedical Data Sciences, Leiden University Medical Center, Leiden, The Netherlands.

<sup>7</sup>Department of Physiology and Pharmacology, Section for Perioperative Medicine and Intensive Care, Karolinska Institutet, Stockholm, Sweden.

<sup>8</sup>Department of Neurosurgery, Antwerp University Hospital, Edegem, Belgium.

<sup>9</sup>Department of Translational Neuroscience, Faculty of Medicine and Health Science, University of Antwerp, Antwerp, Belgium.

<sup>10</sup>Cambridge Centre for Artificial Intelligence in Medicine, Cambridge, United Kingdom.

\*Corresponding author: [sb2406@cam.ac.uk](mailto:sb2406@cam.ac.uk) (SB)

†A full list of the CENTER-TBI investigators and participants are listed after the acknowledgements.

**Running title:** Assessment of the Therapy Intensity Level scale

**Keywords:** traumatic brain injury, therapy intensity level, intracranial pressure, intensive care unit, clinimetrics

**Shubhayu Bhattacharyay**

[sb2406@cam.ac.uk](mailto:sb2406@cam.ac.uk)

+44 (0)1223 217889

Division of Anaesthesia, University of Cambridge,

Box 93, Addenbrooke's Hospital,

Hills Road,

Cambridge CB2 0QQ, United Kingdom

**Erta Beqiri**

[vb391@cam.ac.uk](mailto:vb391@cam.ac.uk)

+44 (0)7912 138171

Brain Physics Lab, Division of Neurosurgery, University of Cambridge,

Box 167, Level A4, A Block, Addenbrooke's Hospital,

Hills Road,

Cambridge CB2 0QQ, United Kingdom

**Patrick Zuercher**

[patrick.zuercher@insel.ch](mailto:patrick.zuercher@insel.ch)

+41 31 664 15 77

Department of Intensive Care Medicine, Inselspital,

**Lindsay Wilson**  
Bern University Hospital, University of Bern,  
Freiburgstrasse 18,  
CH-3010 Bern, Switzerland  
[l.wilson@stir.ac.uk](mailto:l.wilson@stir.ac.uk)  
+44 (0)1786 473171  
Division of Psychology,  
Faculty of Natural Sciences,  
University of Stirling,  
Stirling FK9 4LA, United Kingdom

**Ewout W Steyerberg**  
[e.w.steyerberg@lumc.nl](mailto:e.w.steyerberg@lumc.nl)  
+31 (0)71 5269700  
Dept of Biomedical Data Sciences, Leiden University Medical Center,  
Leiden, The Netherlands

**David W Nelson**  
[david.nelson@regionstockholm.se](mailto:david.nelson@regionstockholm.se)  
+46 812379168  
Function Perioperative medicine and Intensive Care (PMI),  
Karolinska University Hospital, Solna,  
17176 Stockholm, Sweden

**Andrew I R Maas**  
[andrew.maas@uza.be](mailto:andrew.maas@uza.be)  
+32 38214632  
Department of Neurosurgery, Antwerp University Hospital,  
Drie Eikenstraat 655, 2650 Edegem, Belgium

**David K Menon**  
[dkm13@cam.ac.uk](mailto:dkm13@cam.ac.uk)  
+44 (0)1223 217889  
Division of Anaesthesia, University of Cambridge,  
Box 93, Addenbrooke's Hospital,  
Hills Road,  
Cambridge CB2 0QQ, United Kingdom

**Ari Ercole**  
[ae105@cam.ac.uk](mailto:ae105@cam.ac.uk)  
+44 (0)1223 217889  
Division of Anaesthesia, University of Cambridge,  
Box 93, Addenbrooke's Hospital,  
Hills Road,  
Cambridge CB2 0QQ, United Kingdom

## 35 ABSTRACT

36  
37 Intracranial pressure (ICP) data from traumatic brain injury (TBI) patients in the intensive  
38 care unit (ICU) cannot be interpreted appropriately without accounting for the effect of  
39 administered therapy intensity level (TIL) on ICP. A 15-point scale was originally proposed  
40 in 1987 to quantify the hourly intensity of ICP-targeted treatment. This scale was  
41 subsequently modified – through expert consensus – during the development of TBI  
42 Common Data Elements to address statistical limitations and improve usability. The  
43 latest, 38-point scale (hereafter referred to as TIL) permits integrated scoring for a 24-  
44 hour period and has a five-category, condensed version (TIL<sup>(Basic)</sup>) based on qualitative  
45 assessment. Here, we perform a total- and component-score analysis of TIL and TIL<sup>(Basic)</sup>  
46 to: (1) validate the scales across the wide variation in contemporary ICP management,  
47 (2) compare their performance against that of predecessors, and (3) derive guidelines for  
48 proper scale use. From the observational Collaborative European NeuroTrauma  
49 Effectiveness Research in TBI (CENTER-TBI) study, we extract clinical data from a  
50 prospective cohort of ICP-monitored TBI patients ( $n=873$ ) from 52 ICUs across 19  
51 countries. We calculate daily TIL and TIL<sup>(Basic)</sup> scores (TIL<sub>24</sub> and TIL<sup>(Basic)</sup><sub>24</sub>, respectively)  
52 from each patient's first week of ICU stay. We also calculate summary TIL and TIL<sup>(Basic)</sup>  
53 scores by taking the first-week maximum (TIL<sub>max</sub> and TIL<sup>(Basic)</sup><sub>max</sub>) and first-week median  
54 (TIL<sub>median</sub> and TIL<sup>(Basic)</sup><sub>median</sub>) of TIL<sub>24</sub> and TIL<sup>(Basic)</sup><sub>24</sub> scores for each patient. We find that,  
55 across all measures of construct and criterion validity, the latest TIL scale performs  
56 significantly greater than or similarly to all alternative scales (including TIL<sup>(Basic)</sup>) and  
57 integrates the widest range of modern ICP treatments. TIL<sub>median</sub> outperforms both TIL<sub>max</sub>  
58 and summarised ICP values in detecting refractory intracranial hypertension (RICH)  
59 during ICU stay. The RICH detection thresholds which maximise the sum of sensitivity  
60 and specificity are TIL<sub>median</sub>≥7.5 and TIL<sub>max</sub>≥14. The TIL<sub>24</sub> threshold which maximises the  
61 sum of sensitivity and specificity in the detection of surgical ICP control is TIL<sub>24</sub>≥9. The  
62 median scores of each TIL component therapy over increasing TIL<sub>24</sub> reflect a credible  
63 staircase approach to treatment intensity escalation, from head positioning to surgical ICP  
64 control, as well as considerable variability in the use of cerebrospinal fluid drainage and  
65 decompressive craniectomy. Since TIL<sup>(Basic)</sup><sub>max</sub> suffers from a strong statistical ceiling  
66 effect and only covers 17% (95% CI: 16–18%) of the information in TIL<sub>max</sub>, TIL<sup>(Basic)</sup> should  
67 not be used instead of TIL for rating maximum treatment intensity. TIL<sup>(Basic)</sup><sub>24</sub> and  
68 TIL<sup>(Basic)</sup><sub>median</sub> can be suitable replacements for TIL<sub>24</sub> and TIL<sub>median</sub>, respectively (with up  
69 to 33% [95% CI: 31–35%] information coverage) when TIL assessment is infeasible.  
70 Accordingly, we derive numerical ranges for categorising TIL<sub>24</sub> scores into TIL<sup>(Basic)</sup><sub>24</sub>  
71 scores. In conclusion, our results validate TIL across a spectrum of ICP management and  
72 monitoring approaches. TIL is a more sensitive surrogate for pathophysiology than ICP  
73 and thus can be considered an intermediate outcome after TBI.

## 74 MAIN TEXT

75

## 76 Introduction

77

78 Elevated intracranial pressure (ICP) following traumatic brain injury (TBI) may impede the  
79 potential recovery of injured brain tissue and damage initially unaffected brain regions.<sup>1</sup>  
80 Therefore, for TBI patients admitted to the intensive care unit (ICU), clinicians often  
81 monitor ICP and apply a wide range of ICP-reducing treatments.<sup>2</sup> The selective use of  
82 these treatments typically follows a staircase approach, in which therapeutic intensity –  
83 defined by the risk and complexity of each treatment – is incrementally escalated until  
84 adequate ICP control is achieved.<sup>3–5</sup> Thus, therapeutic intensity must be considered when  
85 interpreting ICP. Even if two TBI patients have comparable ICP values, a difference in the  
86 intensity of their ICP-directed therapies likely indicates a difference in pathophysiological  
87 severity.

88

89 Several versions of the Therapy Intensity Level (TIL) scale have been developed to rate  
90 and compare the overall intensity of ICP management amongst TBI patients. TIL scales  
91 assign a relative intensity score to each ICP-targeting therapy and return either the sum  
92 or the maximum value of the scores of simultaneously applied therapies. In 1987, Maset  
93 *et al.* produced the original, 15-point TIL scale (TIL<sup>(1987)</sup>) to be assessed once every four  
94 hours.<sup>6</sup> In 2006, Shore *et al.* published the 38-point Paediatric Intensity Level of Therapy  
95 (PILOT) scale,<sup>7</sup> revising TIL<sup>(1987)</sup> to: (1) represent updated paediatric TBI management  
96 practices, (2) have a more practical, daily assessment frequency, and (3) resolve a  
97 statistical ceiling effect. In 2011, the interagency TBI Common Data Elements (CDE)  
98 scheme developed the most recent, 38-point TIL scale (hereafter referred to as TIL) as  
99 well as a condensed, five-category TIL<sup>(Basic)</sup> scale through expert consensus.<sup>8</sup> The TIL  
100 scale revised PILOT to integrate additional ICP-directed therapies and to be applicable  
101 to adult TBI management. Moreover, TIL<sup>(Basic)</sup> was proposed as a simple, categorical  
102 measure to use when full TIL assessment would be infeasible. Since Zuercher *et al.*  
103 reported the validity and reliability of TIL in a two-centre cohort ( $n=31$ ) in 2016,<sup>9</sup> the scale  
104 has become a popular research metric for quantifying ICP treatment intensity.<sup>10–13</sup>

105

106 However, several critical questions regarding TIL remain unanswered. It is uncertain  
107 whether the validity of TIL, reported in a relatively small population, can be generalised  
108 across the wide variation of ICP management, monitoring, and data acquisition (i.e.,  
109 intermittent chart recording or high-resolution storage<sup>14</sup>) strategies practised in  
110 contemporary intensive care.<sup>11,12,15,16</sup> Furthermore, the scoring configuration of TIL has  
111 never been tested against alternatives (e.g., TIL<sup>(1987)</sup> and PILOT), and the relative  
112 contribution of TIL's component therapies towards the total score is unknown. It is unclear  
113 how TIL<sup>(Basic)</sup> numerically relates to TIL and if the former captures the essential information  
114 of the latter. In this work, we aimed to answer these questions by performing a  
115 comprehensive assessment of TIL on a large, contemporary population of ICP-monitored  
116 TBI patients across European ICUs.

117

## 118 Materials and Methods

119

## 120 **Therapy intensity level (TIL) and alternative scales**

121

122 TIL refers to the 38-point scale developed by the CDE scheme for TBI.<sup>8</sup> The domain or  
123 construct (i.e., targeted concept of a scale) of TIL is the therapeutic intensity of ICP  
124 management. The TIL scale has twelve items, each representing a distinct ICP-targeting  
125 treatment from one of eight modalities, as defined in Table 1. TIL was developed by an  
126 international expert panel which discussed: (1) the relevant ICP-treatment modalities of  
127 modern intensive care, (2) the relative risk and efficacy of individual therapies to derive  
128 scores, and (3) practical and statistical limitations of previous TIL scores.<sup>8</sup> In this way, TIL  
129 is a formative measurement model, in which the construct (i.e., ICP treatment intensity)  
130 is not unidimensional but rather defined by the combination of items (i.e., ICP-targeting  
131 treatments).<sup>17</sup> TIL was shown to have high interrater and intrarater reliability by Zuercher  
132 *et al.*<sup>9</sup> If a decompressive craniectomy was performed as a last resort for refractory  
133 intracranial hypertension, its score was included in the day of the operation and in every  
134 subsequent day of ICU stay. TIL scores can be calculated as frequently as clinically  
135 desired. For our analysis, we calculated the following TIL scores from the first seven days  
136 of ICU stay:

- 137 • TIL<sub>24</sub>, the daily TIL score based on the sum of the highest scores per item per  
138 calendar day,
- 139 • TIL<sub>max</sub>, the maximum TIL<sub>24</sub> over the first week of a patient's ICU stay,
- 140 • TIL<sub>median</sub>, the median TIL<sub>24</sub> over the first week of a patient's ICU stay.

141

142 We also calculated scores from four other therapeutic intensity scales to compare with  
143 TIL scores. The 21-point, unweighted TIL (uwTIL) scale replaces each sub-item score in  
144 TIL with its ascending rank index (i.e., 1, 2, 3, ...) within each item (Table 1). The five-  
145 category TIL<sup>(Basic)</sup> was also developed by the CDE scheme for TBI and takes the  
146 maximum score, from zero (i.e., no ICP-related intervention) to four, amongst all included  
147 sub-items over the calendar day.<sup>8</sup> We adapted the 38-point PILOT<sup>7</sup> and 15-point TIL<sup>(1987)</sup>  
148 scales<sup>6</sup> with minor adjustments to fit the items of TIL with a daily assessment frequency.  
149 PILOT was also shown to have high interrater and intrarater reliability by Shore *et al.*<sup>7</sup>  
150 For the four alternative scales, daily (i.e., uwTIL<sub>24</sub>, TIL<sup>(Basic)</sup><sub>24</sub>, PILOT<sub>24</sub>, and TIL<sup>(1987)</sup><sub>24</sub>),  
151 maximum (i.e., uwTIL<sub>max</sub>, TIL<sup>(Basic)</sup><sub>max</sub>, PILOT<sub>max</sub>, and TIL<sup>(1987)</sup><sub>max</sub>), and median (i.e.,  
152 uwTIL<sub>median</sub>, TIL<sup>(Basic)</sup><sub>median</sub>, PILOT<sub>median</sub>, and TIL<sup>(1987)</sup><sub>median</sub>) scores were calculated in the  
153 same way as TIL<sub>24</sub>, TIL<sub>max</sub>, and TIL<sub>median</sub>, respectively.

154

## 155 **Study design and populations**

156

157 Our study population was prospectively recruited for the Collaborative European  
158 NeuroTrauma Effectiveness Research in Traumatic Brain Injury (CENTER-TBI) core and  
159 high-resolution studies. CENTER-TBI is a longitudinal, observational cohort study  
160 (NCT02210221) involving 65 medical centres across 18 European countries and Israel.  
161 Patients were recruited between 19 December 2014 and 17 December 2017 if they met  
162 the following criteria: (1) presentation within 24 hours of a TBI, (2) clinical indication for a  
163 CT scan, and (3) no severe pre-existing neurological disorder. In accordance with

164 relevant laws of the European Union and the local country, ethical approval was obtained  
165 for each site, and written informed consent by the patient or legal representative was  
166 documented electronically. The list of sites, ethical committees, approval numbers, and  
167 approval dates can be found online: <https://www.center-tbi.eu/project/ethical-approval>.  
168 The project objectives and design of CENTER-TBI have been described in detail  
169 previously.<sup>18,19</sup>

170  
171 In this work, we applied the following inclusion criteria in addition to those of CENTER-  
172 TBI (Fig. 1): (1) primary admission to the ICU, (2) at least 16 years old at ICU admission,  
173 (3) invasive ICP monitoring, (4) no decision to withdraw life-sustaining therapies (WLST)  
174 on the first day of ICU stay, and (5) daily assessment of TIL.

175  
176 For our sub-studies evaluating the association between TIL and ICP-derived values, we  
177 created two sub-populations based on the type of ICP values available. Patients with end-  
178 hour ICP (ICP<sub>EH</sub>) values, which were recorded by clinicians at the end of every other hour,  
179 constituted the TIL-ICP<sub>EH</sub> sub-population. Patients with high-resolution ICP values  
180 (ICP<sub>HR</sub>), which were automatically stored with monitoring software, constituted the TIL-  
181 ICP<sub>HR</sub> sub-population. All patients in the TIL-ICP<sub>HR</sub> sub-population were also members of  
182 the TIL-ICP<sub>EH</sub> sub-population (Fig. 1).

## 183 184 **Data collection**

185  
186 Data for the CENTER-TBI study was collected through the QuesGen electronic case  
187 report form system (QuesGen Systems Inc, Burlingame, CA, USA) hosted on the  
188 International Neuroinformatics Coordinating Facility (INCF) platform (INCF, Stockholm,  
189 Sweden). All data for the validation populations, except high-resolution signals, were  
190 extracted from the CENTER-TBI core study<sup>19</sup> (v3.0, ICU stratum) using Opal database  
191 software.<sup>20</sup>

## 192 193 **ICP management data for TIL calculation**

194  
195 Since TIL<sub>24</sub> was found to be a reliable summary of hourly TIL,<sup>9</sup> clinical data pertinent to  
196 the component items of TIL (i.e., ICP-guided treatments, Table 1) were recorded daily  
197 through the first week of ICU stay. We extracted all daily TIL item values for our  
198 population, and calculated TIL<sub>24</sub>, uwTIL<sub>24</sub>, TIL<sup>(Basic)</sup><sub>24</sub>, PILOT<sub>24</sub>, and TIL<sup>(1987)</sup><sub>24</sub> as defined  
199 in Table 1. For patients who underwent WLST after the first day of ICU stay, we only  
200 extracted TIL item information from before the documented date of WLST decision.

## 201 202 **ICP<sub>EH</sub> and related values**

203  
204 End-hour ICP (ICP<sub>EH</sub>), systolic blood pressure (SBP<sub>EH</sub>), and diastolic blood pressure  
205 (DBP<sub>EH</sub>) were recorded by clinicians every two hours for the TIL-ICP<sub>EH</sub> sub-population.  
206 Mean arterial pressure (MAP<sub>EH</sub>) was calculated as  $MAP_{EH} = (SBP_{EH} + 2DBP_{EH})/3$ , and  
207 cerebral perfusion pressure (CPP<sub>EH</sub>) was calculated as  $CPP_{EH} = MAP_{EH} - ICP_{EH}$ . From  
208 ICP<sub>EH</sub> and CPP<sub>EH</sub>, we calculated the following values:

- 209 • ICP<sub>24</sub> or CPP<sub>24</sub>, the mean ICP or CPP value over a calendar day of ICU stay,
- 210 • ICP<sub>max</sub> or CPP<sub>min</sub>, the maximum ICP<sub>24</sub> or minimum CPP<sub>24</sub> value over the first week
- 211 of a patient's ICU stay,
- 212 • ICP<sub>median</sub> or CPP<sub>median</sub>, the median ICP<sub>24</sub> or CPP<sub>24</sub> value over the first week of a
- 213 patient's ICU stay.

214

## 215 *ICP<sub>HR</sub> and related values*

216

217 High-resolution signals were collected using either ICM+ software (Cambridge Enterprise  
218 Ltd, Cambridge, UK; <http://icmplus.neurosurg.cam.ac.uk>), Moberg CNS monitor (Moberg  
219 Research Inc, Ambler, PA, USA; <https://www.moberg.com>), or both. Blood pressure was  
220 obtained through arterial lines connected to pressure transducers. High-resolution ICP  
221 (ICP<sub>HR</sub>) was acquired from either an intraparenchymal strain gauge probe (Codman ICP  
222 MicroSensor, Codman & Shurtleff Inc, Raynham, MA, USA), a parenchymal fibre optic  
223 pressure sensor (Camino ICP Monitor, Integra Life Sciences, Plainsboro, NJ, USA;  
224 <https://www.integralife.com/>), or an external ventricular drain. Detailed data collection and  
225 pre-processing methods (i.e., artefact cleaning and down-sampling to ten-second  
226 averaged time series) applied to high resolution signals in our study have been described  
227 previously.<sup>21</sup> Ten-second averaged ICP (ICP<sub>HR\_10sec</sub>) and CPP (CPP<sub>HR\_10sec</sub>) time-series  
228 were retrieved for this analysis, and, from ICP<sub>HR\_10sec</sub> and CPP<sub>HR\_10s</sub>, we calculated  
229 ICP<sub>24</sub>/CPP<sub>24</sub>, ICP<sub>max</sub>/CPP<sub>min</sub>, and ICP<sub>median</sub>/CPP<sub>median</sub> as described above.

230

## 231 *Physician impressions*

232

233 Attending ICU physicians were asked to record their daily concerns with the patient's ICP  
234 and CPP, separately, on a scale from one (not concerned) to ten (most concerned).  
235 Moreover, on each patient's ICU discharge summary, physicians were asked to record  
236 whether the patient experienced refractory intracranial hypertension during his or her ICU  
237 stay. Refractory intracranial hypertension was defined as recurrent, sustained (i.e., of at  
238 least ten minutes) increases of ICP above 20 mmHg despite medical ICP management.  
239 We extracted the daily ICP/ CPP concern ratings and refractory intracranial hypertension  
240 impressions which coincided with the ICU stays of our population.

241

## 242 *Baseline characteristics, prognosis, and outcome*

243

244 We extracted baseline demographic characteristics, Marshall CT classifications,<sup>22</sup> and  
245 Glasgow Coma Scale (GCS)<sup>23</sup> scores from ICU admission.<sup>24</sup> We also extracted Glasgow  
246 Outcome Scale – Extended (GOSE) functional outcome scores at six months post-  
247 injury,<sup>25</sup> with imputation of missing values as previously described.<sup>26</sup> Finally, we extracted  
248 ordinal functional outcome prognosis scores, calculated from a tokenised embedding of  
249 all available clinical information in the first 24 hours of ICU stay, as described previously.<sup>27</sup>

250

## 251 *Validation*

252

253 We appraised the validity of TIL according to recommendations of best practice from  
254 clinimetric literature.<sup>28</sup> Based on the identified domain of TIL, we evaluated the construct  
255 and criterion validities of TIL. Our qualitative and quantitative assessments of TIL were  
256 performed against those of alternative scoring configurations (Table 1) for comparison.  
257

## 258 *Construct validity*

259  
260 Construct validity is the extent to which a clinical scale matches expectations of  
261 associations with parameters within or outside the identified domain. Construct validity is  
262 further broken down into convergent validity (i.e., associations with similar constructs),  
263 discriminant validity (i.e., associations with divergent constructs), and differentiation by  
264 known groups. In this work, statistical associations between study variables were  
265 measured with:

- 266 • Spearman's correlation coefficients ( $\rho$ ) for static (i.e., measured once) variables,
- 267 • repeated measures correlation coefficients ( $r_{rm}$ )<sup>29</sup> – interpreted as within-individual  
268 strength of association – for longitudinal (i.e., measured over time) variables,
- 269 • linear mixed effects regression (LMER) coefficients ( $\beta_{LMER}$ ) of daily scale scores  
270 (e.g., TIL<sub>24</sub>) when regressing ICP<sub>24</sub> or CPP<sub>24</sub> on daily scale scores and the day of  
271 ICU stay (Day<sub>ICU</sub>), accounting for inter-patient variability with random intercepts.  
272 Therefore,  $\beta_{LMER}$  were interpreted as the expected difference in ICP<sub>24</sub> or CPP<sub>24</sub> per  
273 unit increase of daily scale score, independent of time since ICU admission or  
274 inter-patient variation.  
275

276 For convergent validity, we expected therapeutic intensity to correlate at least mildly (i.e.,  
277  $|\rho| \geq 0.2$ ,  $|r_{rm}| \geq 0.2$ ,  $|\beta_{LMER}| > 0$ ) with markers of injury severity (i.e., baseline GCS and  
278 baseline outcome prognoses), functional outcome (i.e., six-month GOSE), clinical  
279 concerns of ICP status, and ICP itself. Accordingly, we calculated: (1)  $\rho$  values between  
280 TIL<sub>max</sub> and GCS, ordinal prognosis scores, GOSE, and ICP<sub>max</sub>, (2)  $\rho$  values between  
281 TIL<sub>median</sub> and GCS, ordinal prognosis scores, GOSE, and ICP<sub>median</sub>, (3)  $r_{rm}$  values between  
282 TIL<sub>24</sub> and physician concern of ICP and ICP<sub>24</sub>, and (4)  $\beta_{LMER}$  of TIL<sub>24</sub> when regressing  
283 ICP<sub>24</sub> on Day<sub>ICU</sub> and TIL<sub>24</sub> (i.e.,  $ICP_{24} \sim Day_{ICU} + TIL_{24}$ ), accounting for inter-patient  
284 variability with random intercepts.  
285

286 For discriminant validity, we expected therapeutic intensity to be more strongly correlated  
287 with ICP and physician concerns of ICP than with CPP and physician concerns of CPP,  
288 respectively. Even though CPP control through fluid loading or vasopressor therapy is a  
289 component modality of TIL (Table 1), we expected TIL to capture ICP management (i.e.,  
290 the construct) more accurately than CPP management. We compared: (1)  $\rho$  values of  
291 TIL<sub>max</sub> vs. CPP<sub>min</sub> to those of TIL<sub>max</sub> vs. ICP<sub>max</sub>, (2)  $\rho$  values of TIL<sub>median</sub> vs. CPP<sub>median</sub> to  
292 those of TIL<sub>median</sub> vs. ICP<sub>median</sub>, (3)  $r_{rm}$  values of TIL<sub>24</sub> vs. CPP<sub>24</sub> to those of TIL<sub>24</sub> vs. ICP<sub>24</sub>,  
293 and (4) the  $\beta_{LMER}$  of TIL<sub>24</sub> when regressing CPP<sub>24</sub> ~ Day<sub>ICU</sub> + TIL<sub>24</sub> to the  $\beta_{LMER}$  of TIL<sub>24</sub> when  
294 regressing ICP<sub>24</sub> ~ Day<sub>ICU</sub> + TIL<sub>24</sub>.  
295

296 For differentiation by known groups, we expected TIL<sub>max</sub> and TIL<sub>median</sub> to effectively  
297 discriminate patients who experienced refractory intracranial hypertension during ICU  
298 stay from those who did not. We calculated the area under the receiver operating



299 characteristic curve (AUC), which, in our case, was interpreted as the probability of a  
300 randomly selected patient with refractory intracranial hypertension having a higher  $TIL_{max}$   
301 or  $TIL_{median}$  score than one without it. We also compared the AUCs of  $TIL_{max}$  and  $TIL_{median}$   
302 to  $ICP_{max}$  and  $ICP_{median}$  and determined the sensitivity and specificity of refractory  
303 intracranial hypertension detection at each threshold of  $TIL_{max}$  and  $TIL_{median}$ .  
304

### 305 *Criterion validity*

306  
307 Criterion (or concurrent) validity is the degree to which there is an association between a  
308 clinical scale and other scales measuring the same construct, particularly a gold standard  
309 assessment. Since there is no extant “gold standard” for assessing ICP management  
310 intensity, we tested the concurrent criterion validity of TIL by calculating its associations  
311 with its predecessors (i.e., PILOT and  $TIL^{(1987)}$ ), mindful of their limitations as described  
312 above. More specifically, we calculated: (1)  $\rho$  values between  $TIL_{max}$  and prior scale  
313 maximum scores (i.e.,  $PILOT_{max}$  and  $TIL^{(1987)}_{max}$ ), (2)  $\rho$  values between  $TIL_{median}$  and prior  
314 scale median scores (i.e.,  $PILOT_{median}$  and  $TIL^{(1987)}_{median}$ ), and (3)  $r_{rm}$  between  $TIL_{24}$  and  
315 prior scale daily scores (i.e.,  $PILOT_{24}$  and  $TIL^{(1987)}_{24}$ ).  
316

### 317 *Component item analysis*

318  
319 We evaluated inter-item (i.e., inter-treatment) and adjusted item-total associations of  
320  $TIL_{24}$ ,  $uwTIL_{24}$ ,  $PILOT_{24}$ , and  $TIL^{(1987)}_{24}$  by calculating  $r_{rm}$  values. Item-total correlations  
321 were adjusted by subtracting the tested item score from the total score prior to calculating  
322 the correlation. We measured Cronbach’s alpha ( $\alpha$ ) to assess internal reliability amongst  
323 scale items at each day of ICU stay. Moreover, we calculated the median score  
324 contribution of each item per total  $TIL_{24}$  score. The association between each  $TIL_{24}$  item  
325 score and  $ICP_{24}$ ,  $CPP_{24}$ , physician concern of ICP, and physician concern of CPP was  
326 calculated with  $r_{rm}$  values. Finally, we trained LMER models regressing  $ICP_{24}$  and  $CPP_{24}$   
327 on all TIL items (with categorical dummy encoding) and  $Day_{ICU}$  concurrently. The  $\beta_{LMER}$   
328 values from these models were interpreted as the average change in  $ICP_{24}$  or  $CPP_{24}$   
329 associated with each treatment when accounting for all other ICP-guided treatments, time  
330 since ICU admission, and inter-patient variability with random intercepts.  
331

### 332 *$TIL^{(Basic)}$ information coverage*

333  
334 We examined the distributions of  $TIL^{(Basic)}_{24}$  per  $TIL_{24}$  and  $TIL_{24}$  per  $TIL^{(Basic)}_{24}$  to derive  
335 thresholds for categorising  $TIL_{24}$  into  $TIL^{(Basic)}_{24}$ . We also calculated the information  
336 coverage (IC) of  $TIL^{(Basic)}$  by dividing the mutual information (MI) of  $TIL^{(Basic)}$  and TIL by  
337 the entropy of TIL. IC was calculated with  $TIL^{(Basic)}_{24}$  and  $TIL_{24}$  for days one through seven  
338 of ICU stay, with  $TIL^{(Basic)}_{max}$  and  $TIL_{max}$ , and with  $TIL^{(Basic)}_{median}$  and  $TIL_{median}$ .  
339

### 340 *Statistical analysis*

341

## 342 *Multiple imputation of missing values*

343  
344 Five of the static study variables had missing values for some of the patients in our study:  
345 GCS, GOSE, baseline prognosis scores, Marshall CT classifications, and refractory  
346 intracranial hypertension status. We assessed the patterns of missingness  
347 (Supplementary Fig. S1) and multiply imputed ( $m=100$ ) these variables with independent,  
348 stochastic predictive mean matching functions using the *mice* package<sup>30</sup> (v3.9.0) in R  
349 (v4.2.3). We assumed these variables to be missing-at-random (MAR) (as previously  
350 reported on CENTER-TBI data<sup>31</sup>) and supported this assumption by training imputation  
351 models on all study measures as well as correlated auxiliary variables (e.g., raised ICP  
352 during ICU stay).

353  
354 For daily longitudinal study variables, we considered a value to be missing if the patient  
355 was still in the ICU and WLST had not been decided on or before that day. We assessed  
356 the longitudinal patterns of missingness (Supplementary Fig. S2) and multiply imputed  
357 ( $m=100$ ) these variables with the multivariate, time-series algorithm from the *Amelia II*  
358 package<sup>32</sup> (v1.7.6) in R over the first week of ICU stay. The algorithm exploits both  
359 between-variable and within-variable correlation structures over time to stochastically  
360 impute missing time series values in independently trained runs. We validated the MAR  
361 assumption by identifying characteristics significantly associated with longitudinal  
362 variable missingness (Supplementary Table S1) and included auxiliary information  
363 associated with value missingness (e.g., reasons for stopping ICP monitoring) in the  
364 imputation model.

365

## 366 *Statistical inference*

367  
368 We calculated 95% confidence intervals (CI) for  $\rho$ ,  $r_{rm}$ ,  $\beta_{LMER}$ , AUC, sensitivity, specificity,  
369  $\alpha$ , and IC values using bootstrapping with 1,000 resamples of unique patients. For each  
370 resample, one of the 100 missing value imputations was randomly chosen. Therefore,  
371 confidence intervals represented the uncertainty due to patient resampling and missing  
372 value imputation.

373

## 374 *Code*

375  
376 All statistical analyses were performed in Python (v3.8.2) or R, and all visualisations were  
377 created in R. All scripts used in this study are publicly available on GitHub:  
378 [https://github.com/sbhattacharyay/CENTER-TBI\\_TIL](https://github.com/sbhattacharyay/CENTER-TBI_TIL).

379

## 380 **Results**

381

### 382 *Study population*

383

384 Of the 4,509 patients available for analysis in the CENTER-TBI core study, 873 patients  
385 from 52 ICUs met the additional inclusion criteria of this work. Amongst them, 837

386 constituted the TIL-ICP<sub>EH</sub> sub-population and 259 constituted the TIL-ICP<sub>HR</sub> sub-  
387 population (Fig. 1). Summary characteristics of the overall population as well as those of  
388 the TIL-ICP<sub>EH</sub> and TIL-ICP<sub>HR</sub> sub-populations are detailed in Table 2. Apart from two of  
389 the prognosis scores pertaining to the probability of returning to pre-injury life roles (i.e.,  
390 Pr(GOSE>5) and Pr(GOSE>6)), none of the tested characteristics were significantly  
391 different between patients in the TIL-ICP<sub>HR</sub> sub-population and those outside of it (Table  
392 2).

393  
394 The median ICU stay duration of our population was 14 days (IQR: 7.8–23 days), and  
395 83% ( $n=726$ ) stayed through at least seven calendar days. At each day of ICU stay, less  
396 than 2.4% of the expected TIL scores were missing (Supplementary Fig. S2). Each TIL  
397 component item (Table 1) is represented by at least 17% ( $n=147$ , intracranial surgery)  
398 and each sub-item is represented by at least 4.9% ( $n=43$ , high-dose mannitol) of the  
399 population (Supplementary Table S2). The distributions of TIL<sub>max</sub>, TIL<sub>median</sub>, and TIL<sub>24</sub>,  
400 juxtaposed against the scores of alternative scales (Table 1), are displayed in Fig. 2. The  
401 distributions of TIL and PILOT were visually similar, and TIL<sup>(Basic)</sup><sub>max</sub> had a strong ceiling  
402 effect (i.e., 57% of the population had the maximum score). Whilst there was no significant  
403 difference in TIL<sub>24</sub> distribution over the first seven days, most patients had their highest  
404 TIL<sub>24</sub> (i.e., TIL<sub>max</sub>) soon after ICU admission (median: day two, IQR: days one–three). The  
405 Spearman's rank correlation coefficient ( $\rho$ ) between TIL<sub>max</sub> and TIL<sub>median</sub> was 0.80 (95%  
406 CI: 0.77–0.82), and the median TIL<sub>median</sub>:TIL<sub>max</sub> ratio was 0.65 (IQR: 0.45–0.80).

## 407 408 **Validation of TIL**

409  
410 The 95% CIs of  $\rho$  values, repeated measures correlation coefficients ( $r_{rm}$ ), and linear  
411 mixed effect regression coefficients ( $\beta_{LMER}$ ) of TIL with other study measures are  
412 visualised in Fig. 3. Both TIL<sub>max</sub> and TIL<sub>median</sub> had mildly negative correlations (-  
413  $0.26 < \rho_{\text{mean}} < -0.19$ ) with baseline GCS, six-month GOSE, and functional outcome  
414 prognoses (Fig. 3A–B). The within-individual association of TIL<sub>24</sub> with physician concerns  
415 of ICP was moderately positive ( $r_{rm}=0.35$  [95% CI: 0.31–0.38]) and significantly higher  
416 than that of TIL<sup>(Basic)</sup><sub>24</sub> (Fig. 3C). The association between ICP<sub>median</sub> and TIL<sub>median</sub> was  
417 moderately positive ( $0.35 < \rho_{\text{mean}} < 0.45$ ) with both ICP<sub>EH</sub> and ICP<sub>HR</sub> values, and the  
418 association between ICP<sub>max</sub> and TIL<sub>max</sub> was moderately positive ( $\rho=0.41$  [95% CI: 0.33–  
419 0.46]) with ICP<sub>EH</sub> values. The ICP<sub>max</sub> vs. TIL<sub>max</sub> correlation was not significant ( $\rho=0.01$   
420 [95% CI: -0.16–0.17]) with ICP<sub>HR</sub> values; however, without imputing missing ICP<sub>HR</sub>  
421 values, the  $\rho$  was 0.43 (95% CI: 0.35–0.50). This suggests that the longitudinal  
422 missingness of ICP<sub>HR</sub> (Supplementary Fig. S2) for our sample size made the ICP<sub>max</sub>  
423 estimation significantly imprecise. Additionally, the within-individual association with ICP<sub>24</sub>  
424 was either weak or not significant for any daily scale score according to  $r_{rm}$  (Fig. 3C) and  
425  $\beta_{LMER}$  (Fig. 3D) values. On average, a single point increase in TIL<sub>24</sub> was associated with  
426 a 0.22 (95% CI: 0.15–0.30) mmHg increase in daily mean ICP<sub>EH</sub> and a 0.19 (95% CI: -  
427 0.06–0.43) mmHg increase in daily mean ICP<sub>HR</sub>. These results mostly affirm the  
428 convergent validity of TIL but highlight the broad intra-patient variability between ICP and  
429 therapeutic intensity. From the distribution of ICP<sub>24</sub> values at each TIL<sub>24</sub> score (Fig. 4A),  
430 we observed both considerable ICP<sub>24</sub> overlap across each TIL<sub>24</sub> score and an overall  
431 positive relationship between TIL<sub>24</sub> and ICP<sub>24</sub>, particularly for TIL<sub>24</sub>≥8.

432  
433 The correlation between TIL and both prior scales (i.e., PILOT and TIL<sup>(1987)</sup>) was positively  
434 strong for maximum, median, and daily scores (Supplementary Fig. S3), establishing the  
435 criterion validity of TIL. According to 95% CIs, the association of TIL with prior scales was  
436 stronger than that of uwTIL or TIL<sup>(Basic)</sup> (Supplementary Fig. S3).

437  
438 According to  $\rho$ ,  $r_{rm}$ , and  $\beta_{LMER}$  values (Fig. 3), the associations of TIL with CPP and of TIL  
439 with physician concerns of CPP were weaker than or not significantly different from the  
440 corresponding associations with ICP. Moreover, the trend of CPP<sub>24</sub> distributions over  
441 different TIL<sub>24</sub> scores is not as visually apparent as that of ICP<sub>24</sub> distributions over different  
442 TIL<sub>24</sub> scores (Fig. 4B). These results support the discriminant validity of TIL.

443  
444 In our population, 157 patients (18% of 864 assessed) were reported to experience  
445 refractory intracranial hypertension during ICU stay. TIL<sub>max</sub> correctly discriminated these  
446 patients from the others 81% (95% CI: 78–84%) of the time (Fig. 5A), and TIL<sub>median</sub> did so  
447 83% (95% CI: 80–86%) of the time (Fig. 5B). This performance of TIL was significantly  
448 greater than or similar to that of all alternative scales (Fig. 5A–B). Furthermore, TIL<sub>median</sub>  
449 had significantly greater discrimination performance than ICP<sub>max</sub> (Fig. 5C) and ICP<sub>median</sub>  
450 (Fig. 5D), respectively. The sensitivity and specificity of refractory intracranial  
451 hypertension detection at each threshold of TIL<sub>max</sub>, TIL<sub>median</sub>, TIL<sup>(Basic)</sup><sub>max</sub>, and  
452 TIL<sup>(Basic)</sup><sub>median</sub> are listed in Supplementary Table S3 and visualised in Fig. 5C–D. The  
453 thresholds which maximised the sum of sensitivity and specificity were TIL<sub>max</sub>≥14  
454 (sensitivity: 68% [95% CI: 62–74%], specificity: 79% [95% CI: 77–81%]) and TIL<sub>median</sub>≥7.5  
455 (sensitivity: 81% [95% CI: 77–87%], specificity: 72% [95% CI: 70–75%]) (Table 3).

## 456 457 **TIL component items**

458  
459 Whilst there was wide variation in item combinations per TIL<sub>24</sub> score (i.e., sum of median  
460 scores was often under diagonal line in Fig. 6A), the average order of therapeutic  
461 escalation was fairly consistent: position, sedation, CPP management, ventilatory  
462 management, neuromuscular blockade, hyperosmolar therapy, temperature control, and  
463 then surgery for refractory ICP. Surgical control of ICP occurred in over 50% of reported  
464 cases at each TIL<sub>24</sub> above 18 (Fig. 6A), but the threshold which maximised the sum of  
465 sensitivity and specificity in detecting surgical ICP control was TIL<sub>24</sub>≥9 (Table 3,  
466 performance at each threshold is listed in Supplementary Table S4). The inter-item  $r_{rm}$   
467 values of TIL<sub>24</sub> (Supplementary Fig. S4) were mostly positive except for cerebrospinal  
468 fluid (CSF) drainage, which did not correlate significantly with most other items, and  
469 decompressive craniectomy, which did not correlate significantly with CSF, ventilatory, or  
470 temperature control. Consistent with Fig. 6A, this result suggested that CSF drainage and  
471 decompressive craniectomy were the most variably applied therapies across study ICUs.  
472 The Cronbach's alpha ( $\alpha$ ) value of TIL<sub>24</sub> was, at best, 0.65 (95% CI: 0.62–0.68) and lower  
473 (albeit, not significantly) than that of uwTIL<sub>24</sub> at each day of ICU stay (Supplementary Fig.  
474 S5). However, since TIL is a formative scale (i.e., the construct is multidimensional and  
475 defined by the items), high inter-item correlation and  $\alpha$  values are not necessary for item  
476 validation.<sup>17</sup> Amongst all TIL<sub>24</sub> items, sedation was most strongly correlated with adjusted  
477 TIL<sub>24</sub> scores and physician concerns of ICP (Fig. 6B). From 10≤TIL<sub>24</sub>≤20, a plateau effect

478 of high-dose sedation combined with neuromuscular blockade was observed in most  
479 cases (Fig. 6A). When accounting for all other TIL<sub>24</sub> sub-items, time since ICU admission,  
480 as well as inter-patient variability, ventilation, mannitol administration, and hypertonic  
481 saline administration were most strongly associated with ICP<sub>24</sub> and vasopressors were  
482 most strongly associated with CPP<sub>24</sub> (Fig. 6C).

483

## 484 **TIL<sup>(Basic)</sup>**

485

486 Based on the median TIL<sup>(Basic)</sup><sub>24</sub> score at each TIL<sub>24</sub> score (Fig. 7A), we derived the ranges  
487 for mapping TIL<sub>24</sub> onto TIL<sup>(Basic)</sup><sub>24</sub> in Table 3. There is, however, considerable overlap of  
488 TIL<sub>24</sub> scores across TIL<sup>(Basic)</sup><sub>24</sub> scores (Fig. 7B), particularly in the range of  $6 \leq \text{TIL}_{24} \leq 10$ .  
489 TIL<sup>(Basic)</sup><sub>24</sub>=3 was not the most represented score at any TIL<sub>24</sub> score (Fig. 7A). TIL<sup>(Basic)</sup><sub>24</sub>  
490 covered up to 33% (95% CI: 31–34%) of the information (i.e., entropy) in TIL<sub>24</sub>, and  
491 TIL<sup>(Basic)</sup><sub>median</sub> covered up to 28% (95% CI: 27–30%) of the information in TIL<sub>median</sub> (Fig.  
492 7C). TIL<sup>(Basic)</sup><sub>max</sub> only covered 17% (95% CI: 16–18%) of the information in TIL<sub>max</sub> (Fig.  
493 7C).

494

## 495 **Discussion**

496

497 In this work, we performed a large-scale ( $n=873$ ), multicentre (52 ICUs, 19 countries),  
498 and prospective validation study of TIL and TIL<sup>(Basic)</sup> against alternative scales. Our results  
499 support the validity of TIL as a metric for scoring ICP-directed therapeutic intensity. The  
500 dataset we used, as part of the CENTER-TBI study, not only reflects the modern variation  
501 in ICP-directed therapeutic intensity (Fig. 2 and Fig. 6A) but also illustrates the practical  
502 feasibility of daily TIL assessment: out of 885 eligible patients, 873 (99%) had daily TIL  
503 scores (Fig. 1) with less than 2.4% daily missingness (Supplementary Fig. S2).

504

505 We scrutinised and validated the use of TIL as a metric for scoring ICP-directed  
506 therapeutic intensity and for marking pathophysiological severity. The statistical construct  
507 and criterion validity measures of TIL were significantly greater or similar to those of  
508 alternative scales (Fig. 3 and Fig. 5), and TIL integrated the widest range of modern ICP  
509 treatments (Table 1). Summarised TIL scores outperformed summarised ICP values in  
510 detecting refractory intracranial hypertension. Our analysis yielded empirical ranges for  
511 interpreting TIL in terms of refractory intracranial hypertension, surgical intervention, and  
512 the condensed, TIL<sup>(Basic)</sup> scores (Table 3). On a component level (Fig. 6A), TIL<sub>24</sub> reflected  
513 a pattern of treatment intensity escalation consistent with clinical algorithms<sup>2,3,5</sup> as well as  
514 a wide variation in treatment combinations, particularly in the use of CSF drainage and  
515 decompressive craniectomy. This finding is consistent with a previous CENTER-TBI  
516 study – which revealed inter-centre variation in TIL treatment selection and time to  
517 administration<sup>12</sup> – and encourages an investigation of differences in TIL and long-term  
518 outcome between centres with known differences in ICP management strategies. In  
519 summary, our results support the use of TIL as an intermediate outcome for treatment  
520 effect, as done in previous studies.<sup>33–35</sup>

521

522 Due to a strong ceiling effect (Fig. 2A and Fig. 5A),  $TIL^{(Basic)}$  should not be used instead  
523 of TIL for rating maximum treatment intensity.  $TIL^{(Basic)}_{24}$  and  $TIL_{median}$  covered up to 33%  
524 of the information in  $TIL_{24}$  (Fig. 7C), but the  $TIL^{(Basic)}_{24}$  associations with physician  
525 concerns of ICP were significantly worse than those of  $TIL_{24}$  (Fig. 3C). TIL should always  
526 be preferred to  $TIL^{(Basic)}$ , but we believe daily or median  $TIL^{(Basic)}$  can be a suitable  
527 alternative when daily or median TIL assessment is infeasible.

528  
529 Moreover, we evaluated TIL with both end-hour ( $ICP_{EH}$ ) and high-resolution ( $ICP_{HR}$ ) ICP  
530 values.  $ICP_{HR}$ , if available, should be considered the gold standard in terms of precision  
531 and granularity of the information provided, and neuromonitoring-related results from the  
532  $ICP_{HR}$  population should generally take precedence.<sup>14</sup> However, 67% of expected  $ICP_{HR}$   
533 values were missing on day one of ICU stay (Supplementary Fig. S2), likely due to the  
534 time required to arrange high-resolution data collection. Consequently, estimates of high-  
535 resolution  $ICP_{max}$  were significantly affected by missing value imputation and became  
536 imprecise at our sample size (Fig. 3A). In these cases, results from the  $ICP_{EH}$  population  
537 served as a valuable reference on a substantially larger sample size (Table 2) since  $ICP_{EH}$   
538 and  $CPP_{EH}$  have been shown to be fair end-hour representations of  $ICP_{HR}$  and  $CPP_{HR}$ ,  
539 respectively, in CENTER-TBI.<sup>14</sup> The considerable overlap of  $ICP_{24}$  values across  $TIL_{24}$   
540 scores (both at low and high levels of ICP, Fig. 4A) and the insignificant-to-weak, within-  
541 individual association between  $ICP_{24}$  and  $TIL_{24}$  (Fig. 3C–D) highlight the need to account  
542 for therapeutic intensity when interpreting ICP. Additionally, the higher median  $ICP_{24}$   
543 values for  $TIL_{24} \geq 8$  (Fig. 4A) may suggest that clinicians accept a slightly higher ICP when  
544 balancing the risks of elevating therapeutic intensity against those of intracranial  
545 hypertension.

546  
547 We see three main opportunities to improve TIL. First, the item scores of TIL and its  
548 predecessors (i.e., PILOT and  $TIL^{(1987)}$ ) were not derived empirically. Data-driven  
549 techniques, such as confirmatory factor analysis,<sup>28</sup> can be used to derive scoring  
550 configurations which optimise a defined objective (e.g., maximal separation of patients).  
551 However, data-driven scores do not necessarily reflect the intended construct (i.e.,  
552 treatment risk and complexity),<sup>36</sup> and, in general, item scoring does not have an  
553 appreciable impact on overall scale performance.<sup>28</sup> Second, the items of TIL must evolve  
554 as therapeutic approaches to ICP management evolve. TIL discriminated refractory  
555 intracranial hypertension status significantly better than  $TIL^{(1987)}$  (Fig. 5A–B) because TIL  
556 updated  $TIL^{(1987)}$  with six additional items (Table 1). We recommend updating and re-  
557 evaluating TIL each time ICP-treatment modalities or their perceived risks change.  
558 Finally, the development of TIL was largely informed by the perspective of ICU practices  
559 in high-income countries.<sup>8</sup> Likewise, this assessment was performed in a cohort of  
560 patients across Europe and Israel. Especially given the disproportionately higher burden  
561 of TBI in low- and middle-income countries,<sup>37</sup> it is imperative to test and, if necessary,  
562 adapt TIL to a more inclusive, global population of TBI.

563  
564 By design, TIL does not encompass all facets of modern intensive care for TBI patients.  
565 Brain tissue oxygen tension ( $PbtO_2$ ),<sup>38</sup> cerebral microdialysis,<sup>39</sup> and brain temperature<sup>40</sup>  
566 have emerged as multimodal, neuromonitoring targets which may affect ICU  
567 management in addition to ICP or CPP. Therefore, TIL should be interpreted not as

568 general treatment intensity but rather as the intensity of ICP-directed therapy specifically.  
569 We encourage the development and validation of clinical scales assessing the intensity  
570 of TBI treatments directed at other physiological targets. Since treatments for other  
571 targets often overlap with those for ICP or CPP (e.g., vasopressors target both PbtO<sub>2</sub> and  
572 CPP),<sup>2</sup> we also promote a consolidation of all TBI treatments in an overall therapeutic  
573 intensity scale which considers the effect of each treatment on multiple physiological  
574 targets.

575  
576 We recognise several limitations of our analysis. Whilst numerous investigators assessed  
577 TIL across the study ICUs, each TIL score was only assessed once. Therefore, we could  
578 not evaluate the interrater reliability of TIL. Similarly, data needed to calculate the full TIL  
579 score was only recorded once a day, so we could not determine if a daily assessment  
580 frequency was sufficient. Since the prior TIL validation study reported a high interrater  
581 reliability and recommended a daily assessment frequency,<sup>9</sup> we assumed both to be true.  
582 The results from the Randomised Evaluation of Surgery with Craniectomy for  
583 Uncontrollable Elevation of Intracranial Pressure (RESCUEicp) trial<sup>41</sup> – published amidst  
584 CENTER-TBI patient recruitment in 2016 – have likely changed the global frequency and  
585 perceived intensity of decompressive craniectomy for TBI. Therefore, we recognise the  
586 potentially confounding effect of the trial results on treatment decision making for some  
587 patients in the CENTER-TBI population and encourage a potential reappraisal of the  
588 therapeutic intensity of decompressive craniectomy through expert discussion and  
589 statistical validation. The physician impressions (i.e., physician concerns of ICP and CPP  
590 and refractory intracranial hypertension status) were subjective, and we did not have  
591 enough information to account for interrater variability. Therefore, these scores and labels  
592 should be considered unrefined. Finally, because of limited dosage data for numerical  
593 treatments (i.e., CSF drainage, ventilation, hyperosmolar therapy, and temperature  
594 control), we did not test alternative sub-item categorisations.

595

## 596 **Conclusion**

597  
598 TIL is a valid, generalisable measurement of ICP management amongst neuro-monitored  
599 TBI patients in the ICU. On all validation metrics, TIL performs at least as well as its  
600 alternatives and considers the widest range of modern treatment strategies. TIL's  
601 component scores over increasing TIL reflect a clinically credible order of treatment  
602 escalation, from head positioning to ICP-directed surgery. TIL<sup>(Basic)</sup> is not suitable for  
603 evaluating maximum treatment intensity, but daily TIL<sup>(Basic)</sup> and median TIL<sup>(Basic)</sup> can cover  
604 up to a third of the information in TIL. In the setting of clinical ICP management, TIL is a  
605 more sensitive marker of pathophysiological severity than ICP and can be considered an  
606 intermediate outcome after TBI.

607

## 608 **Transparency, Rigor and Reproducibility Summary**

609  
610 The CENTER-TBI study was pre-registered at [clinicaltrials.gov](https://clinicaltrials.gov) (NCT02210221,  
611 <https://clinicaltrials.gov/ct2/show/NCT02210221>). The analysis plan was registered after  
612 beginning data collection but before data analysis at [Page 15 of 27](https://www.center-</a></p></div><div data-bbox=)

613 [tbi.eu/data/approved-proposals](https://tbi.eu/data/approved-proposals) (#491), and the lead author with primary responsibility for  
614 the analysis certifies that the analysis plan was pre-specified. A sample size of 903  
615 patients was planned based on availability of critically ill, ICP-monitored, adult TBI  
616 patients recruited for CENTER-TBI. Actual sample size was 873, as 18 patients had a  
617 documented decision to WLST on the first day of ICU stay and 12 additional patients did  
618 not have daily TIL scores assessed. A patient inclusion diagram is provided (Fig. 1). TIL  
619 scoring and clinical data entry was performed by investigators who were aware of relevant  
620 characteristics of the participants. Participants were recruited between 19 December  
621 2014 and 17 December 2017, and data (including follow-up results) were collected until  
622 31 March 2021. High-resolution waveforms were stored directly from bedside monitoring  
623 software, as described in the Methods and Materials. Variability amongst different TIL  
624 assessors is not expected to be significant based on the established high interrater  
625 reliability of TIL.<sup>9</sup> All equipment and software used to perform imaging and preprocessing  
626 are widely available from commercial sources or open source repositories. The clinimetric  
627 validation procedure and the primary clinical metric (TIL) are established standards in the  
628 field, based on previously published results<sup>9,28</sup> and this study. The assumption of  
629 bootstrapping-derived confidence intervals is that the sample is representative of the  
630 population. This study is, itself, an external validation, and internal replication by the study  
631 group was performed. Individual participant data are available online, conditional to  
632 approved online study proposal, with no end date at <https://www.center-tbi.eu/data>.  
633 Signed confirmation of a data access agreement is required, and all access must comply  
634 with regulatory restrictions imposed on the original study. All analytic code used to  
635 perform the statistical analyses are publicly available online at:  
636 [https://github.com/sbhattacharyay/CENTER-TBI\\_TIL](https://github.com/sbhattacharyay/CENTER-TBI_TIL). This paper will be published under  
637 a Creative Commons Open Access license, and upon publication, will be freely available  
638 at <https://www.liebertpub.com/loi/neu>.

639

## 640 **Acknowledgments**

641

642 We are grateful to the patients and families of our study for making our efforts to improve  
643 TBI care possible. S.B. would like to thank Kathleen Mitchell-Fox (Princeton University)  
644 for offering comments on the manuscript.

645

## 646 **Author contributions**

647

648 S.B. co-conceptualised the aims, developed the methodology and design, curated,  
649 analysed, and visualised the data, acquired funding, and wrote the manuscript. E.B.  
650 curated and analysed data, acquired funding, and reviewed the manuscript. P.Z. and L.W.  
651 curated data, aided in the development of methodology, and reviewed the manuscript.  
652 EWS and DWN curated data, acquired funding, advised statistical analysis, and reviewed  
653 the manuscript. A.I.R.M. and D.K.M. curated data, acquired funding, co-conceptualised  
654 the aims, co-developed the methodology, and reviewed the manuscript. A.E. served as  
655 principal investigator, curated data, conceptualised the aims, co-developed the  
656 methodology, and reviewed the manuscript. All authors read and approved the final  
657 manuscript.



658

## Conflicts of interest

659

660

661 All authors declare no financial or non-financial competing interests.

662

## Funding statement

663

664

665 This research was supported by the National Institute for Health Research (NIHR) Brain  
666 Injury MedTech Co-operative. CENTER-TBI was supported by the European Union 7<sup>th</sup>  
667 Framework programme (EC grant 602150). Additional funding was obtained from the  
668 Hannelore Kohl Stiftung (Germany), from OneMind (USA), from Integra LifeSciences  
669 Corporation (USA), and from NeuroTrauma Sciences (USA). CENTER-TBI also  
670 acknowledges interactions and support from the International Initiative for TBI Research  
671 (InTBIR) investigators. S.B. is funded by a Gates Cambridge Scholarship. E.B. is funded  
672 by the Medical Research Council (MR N013433-1) and by a Gates Cambridge  
673 Scholarship. The funders had no role in study design, data collection and analysis,  
674 decision to publish, or preparation of the manuscript.

675

## The CENTER-TBI investigators and participants

676

677

678 The co-lead investigators of CENTER-TBI are designated with an asterisk (\*), and their  
679 contact email addresses are listed below.

680

681 Cecilia Åkerlund<sup>1</sup>, Krisztina Amrein<sup>2</sup>, Nada Andelic<sup>3</sup>, Lasse Andreassen<sup>4</sup>, Audny Anke<sup>5</sup>,  
682 Anna Antoni<sup>6</sup>, Gérard Audibert<sup>7</sup>, Philippe Azouvi<sup>8</sup>, Maria Luisa Azzolini<sup>9</sup>, Ronald Bartels<sup>10</sup>,  
683 Pál Barzó<sup>11</sup>, Romuald Beauvais<sup>12</sup>, Ronny Beer<sup>13</sup>, Bo-Michael Bellander<sup>14</sup>, Antonio Belli<sup>15</sup>,  
684 Habib Benali<sup>16</sup>, Maurizio Berardino<sup>17</sup>, Luigi Beretta<sup>9</sup>, Morten Blaabjerg<sup>18</sup>, Peter Bragge<sup>19</sup>,  
685 Alexandra Brazinova<sup>20</sup>, Vibeke Brinck<sup>21</sup>, Joanne Brooker<sup>22</sup>, Camilla Brorsson<sup>23</sup>, Andras  
686 Buki<sup>24</sup>, Monika Bullinger<sup>25</sup>, Manuel Cabeleira<sup>26</sup>, Alessio Caccioppola<sup>27</sup>, Emiliana  
687 Calappi<sup>27</sup>, Maria Rosa Calvi<sup>9</sup>, Peter Cameron<sup>28</sup>, Guillermo Carbayo Lozano<sup>29</sup>, Marco  
688 Carbonara<sup>27</sup>, Simona Cavallo<sup>17</sup>, Giorgio Chevallard<sup>30</sup>, Arturo Chierogato<sup>30</sup>, Giuseppe  
689 Citerio<sup>31,32</sup>, Hans Clusmann<sup>33</sup>, Mark Coburn<sup>34</sup>, Jonathan Coles<sup>35</sup>, Jamie D. Cooper<sup>36</sup>,  
690 Marta Correia<sup>37</sup>, Amra Čović<sup>38</sup>, Nicola Curry<sup>39</sup>, Endre Czeiter<sup>24</sup>, Marek Czosnyka<sup>26</sup>, Claire  
691 Dahyot-Fizelier<sup>40</sup>, Paul Dark<sup>41</sup>, Helen Dawes<sup>42</sup>, Véronique De Keyser<sup>43</sup>, Vincent Degos<sup>16</sup>,  
692 Francesco Della Corte<sup>44</sup>, Hugo den Boogert<sup>10</sup>, Bart Depreitere<sup>45</sup>, Đula Đilvesi<sup>46</sup>, Abhishek  
693 Dixit<sup>47</sup>, Emma Donoghue<sup>22</sup>, Jens Dreier<sup>48</sup>, Guy-Loup Dulière<sup>49</sup>, Ari Ercole<sup>47</sup>, Patrick  
694 Esser<sup>42</sup>, Erzsébet Ezer<sup>50</sup>, Martin Fabricius<sup>51</sup>, Valery L. Feigin<sup>52</sup>, Kelly Foks<sup>53</sup>, Shirin  
695 Frisvold<sup>54</sup>, Alex Furmanov<sup>55</sup>, Pablo Gagliardo<sup>56</sup>, Damien Galanaud<sup>16</sup>, Dashiell Gantner<sup>28</sup>,  
696 Guoyi Gao<sup>57</sup>, Pradeep George<sup>58</sup>, Alexandre Ghuysen<sup>59</sup>, Lelde Giga<sup>60</sup>, Ben Glocker<sup>61</sup>,  
697 Jagoš Golubovic<sup>46</sup>, Pedro A. Gomez<sup>62</sup>, Johannes Gratz<sup>63</sup>, Benjamin Gravesteijn<sup>64</sup>,  
698 Francesca Grossi<sup>44</sup>, Russell L. Gruen<sup>65</sup>, Deepak Gupta<sup>66</sup>, Juanita A. Haagsma<sup>64</sup>, Iain  
699 Haitsma<sup>67</sup>, Raimund Helbok<sup>13</sup>, Eirik Helseth<sup>68</sup>, Lindsay Horton<sup>69</sup>, Jilske Huijben<sup>64</sup>, Peter  
700 J. Hutchinson<sup>70</sup>, Bram Jacobs<sup>71</sup>, Stefan Jankowski<sup>72</sup>, Mike Jarrett<sup>21</sup>, Ji-yao Jiang<sup>58</sup>, Faye  
701 Johnson<sup>73</sup>, Kelly Jones<sup>52</sup>, Mladen Karan<sup>46</sup>, Angelos G. Koliass<sup>70</sup>, Erwin Kompanje<sup>74</sup>, Daniel  
702 Kondziella<sup>51</sup>, Evgenios Kornaropoulos<sup>47</sup>, Lars-Owe Koskinen<sup>75</sup>, Noémi Kovács<sup>76</sup>, Ana

703 Kowark<sup>77</sup>, Alfonso Lagares<sup>62</sup>, Linda Lanyon<sup>58</sup>, Steven Laureys<sup>78</sup>, Fiona Lecky<sup>79,80</sup>, Didier  
704 Ledoux<sup>78</sup>, Rolf Lefering<sup>81</sup>, Valerie Legrand<sup>82</sup>, Aurelie Lejeune<sup>83</sup>, Leon Levi<sup>84</sup>, Roger  
705 Lightfoot<sup>85</sup>, Hester Lingsma<sup>64</sup>, Andrew I.R. Maas<sup>43,86,\*</sup>, Ana M. Castaño-León<sup>62</sup>, Marc  
706 Maegele<sup>87</sup>, Marek Majdan<sup>20</sup>, Alex Manara<sup>88</sup>, Geoffrey Manley<sup>89</sup>, Costanza Martino<sup>90</sup>,  
707 Hugues Maréchal<sup>49</sup>, Julia Mattern<sup>91</sup>, Catherine McMahon<sup>92</sup>, Béla Melegh<sup>93</sup>, David  
708 Menon<sup>47,\*</sup>, Tomas Menovsky<sup>43,86</sup>, Ana Mikolic<sup>64</sup>, Benoit Misset<sup>78</sup>, Visakh  
709 Muraleedharan<sup>58</sup>, Lynnette Murray<sup>28</sup>, Ancuta Negru<sup>94</sup>, David Nelson<sup>1</sup>, Virginia  
710 Newcombe<sup>47</sup>, Daan Nieboer<sup>64</sup>, József Nyirádi<sup>2</sup>, Otesile Olubukola<sup>79</sup>, Matej Oresic<sup>95</sup>,  
711 Fabrizio Ortolano<sup>27</sup>, Aarno Palotie<sup>96,97,98</sup>, Paul M. Parizel<sup>99</sup>, Jean-François Payen<sup>100</sup>,  
712 Natascha Perera<sup>12</sup>, Vincent Perlberg<sup>16</sup>, Paolo Persona<sup>101</sup>, Wilco Peul<sup>102</sup>, Anna Piippo-  
713 Karjalainen<sup>103</sup>, Matti Pirinen<sup>96</sup>, Dana Pisica<sup>64</sup>, Horia Ples<sup>94</sup>, Suzanne Polinder<sup>64</sup>, Inigo  
714 Pomposo<sup>29</sup>, Jussi P. Posti<sup>104</sup>, Louis Puybasset<sup>105</sup>, Andreea Radoi<sup>106</sup>, Arminas  
715 Ragauskas<sup>107</sup>, Rahul Raj<sup>103</sup>, Malinka Rambadagalla<sup>108</sup>, Isabel Retel Helmrich<sup>64</sup>, Jonathan  
716 Rhodes<sup>109</sup>, Sylvia Richardson<sup>110</sup>, Sophie Richter<sup>47</sup>, Samuli Ripatti<sup>96</sup>, Saulius Rocka<sup>107</sup>,  
717 Cecilie Roe<sup>111</sup>, Olav Roise<sup>112,113</sup>, Jonathan Rosand<sup>114</sup>, Jeffrey V. Rosenfeld<sup>115</sup>, Christina  
718 Rosenlund<sup>116</sup>, Guy Rosenthal<sup>55</sup>, Rolf Rossaint<sup>77</sup>, Sandra Rossi<sup>101</sup>, Daniel Rueckert<sup>61</sup>  
719 Martin Rusnák<sup>117</sup>, Juan Sahuquillo<sup>106</sup>, Oliver Sakowitz<sup>91,118</sup>, Renan Sanchez-Porras<sup>118</sup>,  
720 Janos Sandor<sup>119</sup>, Nadine Schäfer<sup>81</sup>, Silke Schmidt<sup>120</sup>, Herbert Schoechl<sup>121</sup>, Guus  
721 Schoonman<sup>122</sup>, Rico Frederik Schou<sup>123</sup>, Elisabeth Schwendenwein<sup>6</sup>, Charlie Sewalt<sup>64</sup>,  
722 Ranjit D. Singh<sup>102</sup>, Toril Skandsen<sup>124,125</sup>, Peter Smielewski<sup>26</sup>, Abayomi Sorinola<sup>126</sup>,  
723 Emmanuel Stamatakis<sup>47</sup>, Simon Stanworth<sup>39</sup>, Robert Stevens<sup>127</sup>, William Stewart<sup>128</sup>,  
724 Ewout W. Steyerberg<sup>64,129</sup>, Nino Stocchetti<sup>130</sup>, Nina Sundström<sup>131</sup>, Riikka Takala<sup>132</sup>,  
725 Viktória Tamás<sup>126</sup>, Tomas Tamosuitis<sup>133</sup>, Mark Steven Taylor<sup>20</sup>, Aurore Thibaut<sup>78</sup>, Braden  
726 Te Ao<sup>52</sup>, Olli Tenovuo<sup>104</sup>, Alice Theadom<sup>52</sup>, Matt Thomas<sup>88</sup>, Dick Tibboel<sup>134</sup>, Marjolein  
727 Timmers<sup>74</sup>, Christos Tolia<sup>135</sup>, Tony Trapani<sup>28</sup>, Cristina Maria Tudora<sup>94</sup>, Andreas  
728 Unterberg<sup>91</sup>, Peter Vajkoczy<sup>136</sup>, Shirley Vallance<sup>28</sup>, Egils Valeinis<sup>60</sup>, Zoltán Vámos<sup>50</sup>,  
729 Mathieu van der Jagt<sup>137</sup>, Gregory Van der Steen<sup>43</sup>, Joukje van der Naalt<sup>71</sup>, Jeroen T.J.M.  
730 van Dijck<sup>102</sup>, Inge A. M. van Erp<sup>102</sup>, Thomas A. van Essen<sup>102</sup>, Wim Van Hecke<sup>138</sup>, Caroline  
731 van Heugten<sup>139</sup>, Ernest van Veen<sup>64</sup>, Thijs Vande Vyvere<sup>140</sup>, Roel P. J. van Wijk<sup>102</sup>, Alessia  
732 Vargiolu<sup>32</sup>, Emmanuel Vega<sup>83</sup>, Kimberley Velt<sup>64</sup>, Jan Verheyden<sup>138</sup>, Paul M. Vespa<sup>141</sup>,  
733 Anne Vik<sup>124,142</sup>, Rimantas Vilcinis<sup>133</sup>, Victor Volovic<sup>67</sup>, Nicole von Steinbüchel<sup>38</sup>, Daphne  
734 Voormolen<sup>64</sup>, Petar Vulekovic<sup>46</sup>, Kevin K.W. Wang<sup>143</sup>, Daniel Whitehouse<sup>47</sup>, Eveline  
735 Wieggers<sup>64</sup>, Guy Williams<sup>47</sup>, Lindsay Wilson<sup>69</sup>, Stefan Winzeck<sup>47</sup>, Stefan Wolf<sup>144</sup>, Zhihui  
736 Yang<sup>114</sup>, Peter Ylén<sup>145</sup>, Alexander Younsi<sup>91</sup>, Frederick A. Zeiler<sup>47,146</sup>, Veronika  
737 Zelinkova<sup>20</sup>, Agate Ziverte<sup>60</sup>, Tommaso Zoerle<sup>27</sup>

738  
739 <sup>1</sup>Department of Physiology and Pharmacology, Section of Perioperative Medicine and  
740 Intensive Care, Karolinska Institutet, Stockholm, Sweden

741 <sup>2</sup>János Szentágothai Research Centre, University of Pécs, Pécs, Hungary

742 <sup>3</sup>Division of Clinical Neuroscience, Department of Physical Medicine and Rehabilitation,  
743 Oslo University Hospital and University of Oslo, Oslo, Norway

744 <sup>4</sup>Department of Neurosurgery, University Hospital Northern Norway, Tromsø, Norway

745 <sup>5</sup>Department of Physical Medicine and Rehabilitation, University Hospital Northern  
746 Norway, Tromsø, Norway

747 <sup>6</sup>Trauma Surgery, Medical University Vienna, Vienna, Austria

- 748 <sup>7</sup>Department of Anesthesiology & Intensive Care, University Hospital Nancy, Nancy,  
749 France
- 750 <sup>8</sup>Raymond Poincare hospital, Assistance Publique – Hopitaux de Paris, Paris, France
- 751 <sup>9</sup>Department of Anesthesiology & Intensive Care, S Raffaele University Hospital, Milan,  
752 Italy
- 753 <sup>10</sup>Department of Neurosurgery, Radboud University Medical Center, Nijmegen, The  
754 Netherlands
- 755 <sup>11</sup>Department of Neurosurgery, University of Szeged, Szeged, Hungary
- 756 <sup>12</sup>International Projects Management, ARTTIC, Munchen, Germany
- 757 <sup>13</sup>Department of Neurology, Neurological Intensive Care Unit, Medical University of  
758 Innsbruck, Innsbruck, Austria
- 759 <sup>14</sup>Department of Neurosurgery & Anesthesia & intensive care medicine, Karolinska  
760 University Hospital, Stockholm, Sweden
- 761 <sup>15</sup>NIHR Surgical Reconstruction and Microbiology Research Centre, Birmingham, UK
- 762 <sup>16</sup>Anesthésie-Réanimation, Assistance Publique – Hopitaux de Paris, Paris, France
- 763 <sup>17</sup>Department of Anesthesia & ICU, AOU Città della Salute e della Scienza di Torino -  
764 Orthopedic and Trauma Center, Torino, Italy
- 765 <sup>18</sup>Department of Neurology, Odense University Hospital, Odense, Denmark
- 766 <sup>19</sup>BehaviourWorks Australia, Monash Sustainability Institute, Monash University, Victoria,  
767 Australia
- 768 <sup>20</sup>Department of Public Health, Faculty of Health Sciences and Social Work, Trnava  
769 University, Trnava, Slovakia
- 770 <sup>21</sup>Quesgen Systems Inc., Burlingame, California, USA
- 771 <sup>22</sup>Australian & New Zealand Intensive Care Research Centre, Department of  
772 Epidemiology and Preventive Medicine, School of Public Health and Preventive  
773 Medicine, Monash University, Melbourne, Australia
- 774 <sup>23</sup>Department of Surgery and Perioperative Science, Umeå University, Umeå, Sweden
- 775 <sup>24</sup>Department of Neurosurgery, Medical School, University of Pécs, Hungary and  
776 Neurotrauma Research Group, János Szentágothai Research Centre, University of  
777 Pécs, Hungary
- 778 <sup>25</sup>Department of Medical Psychology, Universitätsklinikum Hamburg-Eppendorf,  
779 Hamburg, Germany
- 780 <sup>26</sup>Brain Physics Lab, Division of Neurosurgery, Dept of Clinical Neurosciences, University  
781 of Cambridge, Addenbrooke's Hospital, Cambridge, UK
- 782 <sup>27</sup>Neuro ICU, Fondazione IRCCS Cà Granda Ospedale Maggiore Policlinico, Milan, Italy
- 783 <sup>28</sup>ANZIC Research Centre, Monash University, Department of Epidemiology and  
784 Preventive Medicine, Melbourne, Victoria, Australia
- 785 <sup>29</sup>Department of Neurosurgery, Hospital of Cruces, Bilbao, Spain
- 786 <sup>30</sup>NeuroIntensive Care, Niguarda Hospital, Milan, Italy
- 787 <sup>31</sup>School of Medicine and Surgery, Università Milano Bicocca, Milano, Italy
- 788 <sup>32</sup>NeuroIntensive Care Unit, Department Neuroscience, IRCCS Fondazione San Gerardo  
789 dei Tintori, Monza, Italy
- 790 <sup>33</sup>Department of Neurosurgery, Medical Faculty RWTH Aachen University, Aachen,  
791 Germany
- 792 <sup>34</sup>Department of Anesthesiology and Intensive Care Medicine, University Hospital Bonn,  
793 Bonn, Germany

- 794 <sup>35</sup>Department of Anesthesia & Neurointensive Care, Cambridge University Hospital NHS  
795 Foundation Trust, Cambridge, UK
- 796 <sup>36</sup>School of Public Health & PM, Monash University and The Alfred Hospital, Melbourne,  
797 Victoria, Australia
- 798 <sup>37</sup>Radiology/MRI department, MRC Cognition and Brain Sciences Unit, Cambridge, UK
- 799 <sup>38</sup>Institute of Medical Psychology and Medical Sociology, Universitätsmedizin Göttingen,  
800 Göttingen, Germany
- 801 <sup>39</sup>Oxford University Hospitals NHS Trust, Oxford, UK
- 802 <sup>40</sup>Intensive Care Unit, CHU Poitiers, Poitiers, France
- 803 <sup>41</sup>University of Manchester NIHR Biomedical Research Centre, Critical Care Directorate,  
804 Salford Royal Hospital NHS Foundation Trust, Salford, UK
- 805 <sup>42</sup>Movement Science Group, Faculty of Health and Life Sciences, Oxford Brookes  
806 University, Oxford, UK
- 807 <sup>43</sup>Department of Neurosurgery, Antwerp University Hospital, Edegem, Belgium
- 808 <sup>44</sup>Department of Anesthesia & Intensive Care, Maggiore Della Carità Hospital, Novara,  
809 Italy
- 810 <sup>45</sup>Department of Neurosurgery, University Hospitals Leuven, Leuven, Belgium
- 811 <sup>46</sup>Department of Neurosurgery, Clinical centre of Vojvodina, Faculty of Medicine,  
812 University of Novi Sad, Novi Sad, Serbia
- 813 <sup>47</sup>Division of Anaesthesia, University of Cambridge, Addenbrooke's Hospital, Cambridge,  
814 UK
- 815 <sup>48</sup>Center for Stroke Research Berlin, Charité – Universitätsmedizin Berlin, corporate  
816 member of Freie Universität Berlin, Humboldt-Universität zu Berlin, and Berlin Institute  
817 of Health, Berlin, Germany
- 818 <sup>49</sup>Intensive Care Unit, CHR Citadelle, Liège, Belgium
- 819 <sup>50</sup>Department of Anaesthesiology and Intensive Therapy, University of Pécs, Pécs,  
820 Hungary
- 821 <sup>51</sup>Departments of Neurology, Clinical Neurophysiology and Neuroanesthesiology, Region  
822 Hovedstaden Rigshospitalet, Copenhagen, Denmark
- 823 <sup>52</sup>National Institute for Stroke and Applied Neurosciences, Faculty of Health and  
824 Environmental Studies, Auckland University of Technology, Auckland, New Zealand
- 825 <sup>53</sup>Department of Neurology, Erasmus MC, Rotterdam, the Netherlands
- 826 <sup>54</sup>Department of Anesthesiology and Intensive care, University Hospital Northern Norway,  
827 Tromsø, Norway
- 828 <sup>55</sup>Department of Neurosurgery, Hadassah-hebrew University Medical center, Jerusalem,  
829 Israel
- 830 <sup>56</sup>Fundación Instituto Valenciano de Neurorehabilitación (FIVAN), Valencia, Spain
- 831 <sup>57</sup>Department of Neurosurgery, Shanghai Renji hospital, Shanghai Jiaotong  
832 University/school of medicine, Shanghai, China
- 833 <sup>58</sup>Karolinska Institutet, INCF International Neuroinformatics Coordinating Facility,  
834 Stockholm, Sweden
- 835 <sup>59</sup>Emergency Department, CHU, Liège, Belgium
- 836 <sup>60</sup>Neurosurgery clinic, Pauls Stradins Clinical University Hospital, Riga, Latvia
- 837 <sup>61</sup>Department of Computing, Imperial College London, London, UK
- 838 <sup>62</sup>Department of Neurosurgery, Hospital Universitario 12 de Octubre, Madrid, Spain

- 839 <sup>63</sup>Department of Anesthesia, Critical Care and Pain Medicine, Medical University of  
840 Vienna, Austria
- 841 <sup>64</sup>Department of Public Health, Erasmus Medical Center-University Medical Center,  
842 Rotterdam, The Netherlands
- 843 <sup>65</sup>College of Health and Medicine, Australian National University, Canberra, Australia
- 844 <sup>66</sup>Department of Neurosurgery, Neurosciences Centre & JPN Apex trauma centre, All  
845 India Institute of Medical Sciences, New Delhi-110029, India
- 846 <sup>67</sup>Department of Neurosurgery, Erasmus MC, Rotterdam, the Netherlands
- 847 <sup>68</sup>Department of Neurosurgery, Oslo University Hospital, Oslo, Norway
- 848 <sup>69</sup>Division of Psychology, University of Stirling, Stirling, UK
- 849 <sup>70</sup>Division of Neurosurgery, Department of Clinical Neurosciences, Addenbrooke's  
850 Hospital & University of Cambridge, Cambridge, UK
- 851 <sup>71</sup>Department of Neurology, University of Groningen, University Medical Center  
852 Groningen, Groningen, Netherlands
- 853 <sup>72</sup>Neurointensive Care, Sheffield Teaching Hospitals NHS Foundation Trust, Sheffield,  
854 UK
- 855 <sup>73</sup>Salford Royal Hospital NHS Foundation Trust Acute Research Delivery Team, Salford,  
856 UK
- 857 <sup>74</sup>Department of Intensive Care and Department of Ethics and Philosophy of Medicine,  
858 Erasmus Medical Center, Rotterdam, The Netherlands
- 859 <sup>75</sup>Department of Clinical Neuroscience, Neurosurgery, Umeå University, Umeå, Sweden
- 860 <sup>76</sup>Hungarian Brain Research Program - Grant No. KTIA\_13\_NAP-A-II/8, University of  
861 Pécs, Pécs, Hungary
- 862 <sup>77</sup>Department of Anaesthesiology, University Hospital of Aachen, Aachen, Germany
- 863 <sup>78</sup>Cyclotron Research Center, University of Liège, Liège, Belgium
- 864 <sup>79</sup>Centre for Urgent and Emergency Care Research (CURE), Health Services Research  
865 Section, School of Health and Related Research (SchARR), University of Sheffield,  
866 Sheffield, UK
- 867 <sup>80</sup>Emergency Department, Salford Royal Hospital, Salford UK
- 868 <sup>81</sup>Institute of Research in Operative Medicine (IFOM), Witten/Herdecke University,  
869 Cologne, Germany
- 870 <sup>82</sup>VP Global Project Management CNS, ICON, Paris, France
- 871 <sup>83</sup>Department of Anesthesiology-Intensive Care, Lille University Hospital, Lille, France
- 872 <sup>84</sup>Department of Neurosurgery, Rambam Medical Center, Haifa, Israel
- 873 <sup>85</sup>Department of Anesthesiology & Intensive Care, University Hospitals Southampton  
874 NHS Trust, Southampton, UK
- 875 <sup>86</sup>Department of Translational Neuroscience, Faculty of Medicine and Health Science,  
876 University of Antwerp, Antwerp, Belgium
- 877 <sup>87</sup>Cologne-Merheim Medical Center (CMMC), Department of Traumatology, Orthopedic  
878 Surgery and Sportmedicine, Witten/Herdecke University, Cologne, Germany
- 879 <sup>88</sup>Intensive Care Unit, Southmead Hospital, Bristol, Bristol, UK
- 880 <sup>89</sup>Department of Neurological Surgery, University of California, San Francisco, California,  
881 USA
- 882 <sup>90</sup>Department of Anesthesia & Intensive Care, M. Bufalini Hospital, Cesena, Italy
- 883 <sup>91</sup>Department of Neurosurgery, University Hospital Heidelberg, Heidelberg, Germany
- 884 <sup>92</sup>Department of Neurosurgery, The Walton centre NHS Foundation Trust, Liverpool, UK

- 885 <sup>93</sup>Department of Medical Genetics, University of Pécs, Pécs, Hungary  
886 <sup>94</sup>Department of Neurosurgery, Emergency County Hospital Timisoara, Timisoara,  
887 Romania  
888 <sup>95</sup>School of Medical Sciences, Örebro University, Örebro, Sweden  
889 <sup>96</sup>Institute for Molecular Medicine Finland, University of Helsinki, Helsinki, Finland  
890 <sup>97</sup>Analytic and Translational Genetics Unit, Department of Medicine; Psychiatric &  
891 Neurodevelopmental Genetics Unit, Department of Psychiatry; Department of  
892 Neurology, Massachusetts General Hospital, Boston, MA, USA  
893 <sup>98</sup>Program in Medical and Population Genetics; The Stanley Center for Psychiatric  
894 Research, The Broad Institute of MIT and Harvard, Cambridge, MA, USA  
895 <sup>99</sup>Department of Radiology, University of Antwerp, Edegem, Belgium  
896 <sup>100</sup>Department of Anesthesiology & Intensive Care, University Hospital of Grenoble,  
897 Grenoble, France  
898 <sup>101</sup>Department of Anesthesia & Intensive Care, Azienda Ospedaliera Università di  
899 Padova, Padova, Italy  
900 <sup>102</sup>Dept. of Neurosurgery, Leiden University Medical Center, Leiden, The Netherlands and  
901 Dept. of Neurosurgery, Medical Center Haaglanden, The Hague, The Netherlands  
902 <sup>103</sup>Department of Neurosurgery, Helsinki University Central Hospital  
903 <sup>104</sup>Division of Clinical Neurosciences, Department of Neurosurgery and Turku Brain Injury  
904 Centre, Turku University Hospital and University of Turku, Turku, Finland  
905 <sup>105</sup>Department of Anesthesiology and Critical Care, Pitié -Salpêtrière Teaching Hospital,  
906 Assistance Publique, Hôpitaux de Paris and University Pierre et Marie Curie, Paris,  
907 France  
908 <sup>106</sup>Neurotraumatology and Neurosurgery Research Unit (UNINN), Vall d'Hebron  
909 Research Institute, Barcelona, Spain  
910 <sup>107</sup>Department of Neurosurgery, Kaunas University of technology and Vilnius University,  
911 Vilnius, Lithuania  
912 <sup>108</sup>Department of Neurosurgery, Rezekne Hospital, Latvia  
913 <sup>109</sup>Department of Anaesthesia, Critical Care & Pain Medicine NHS Lothian & University  
914 of Edinburgh, Edinburgh, UK  
915 <sup>110</sup>Director, MRC Biostatistics Unit, Cambridge Institute of Public Health, Cambridge, UK  
916 <sup>111</sup>Department of Physical Medicine and Rehabilitation, Oslo University  
917 Hospital/University of Oslo, Oslo, Norway  
918 <sup>112</sup>Division of Orthopedics, Oslo University Hospital, Oslo, Norway  
919 <sup>113</sup>Institute of Clinical Medicine, Faculty of Medicine, University of Oslo, Oslo, Norway  
920 <sup>114</sup>Broad Institute, Cambridge MA Harvard Medical School, Boston MA, Massachusetts  
921 General Hospital, Boston MA, USA  
922 <sup>115</sup>National Trauma Research Institute, The Alfred Hospital, Monash University,  
923 Melbourne, Victoria, Australia  
924 <sup>116</sup>Department of Neurosurgery, Odense University Hospital, Odense, Denmark  
925 <sup>117</sup>International Neurotrauma Research Organisation, Vienna, Austria  
926 <sup>118</sup>Klinik für Neurochirurgie, Klinikum Ludwigsburg, Ludwigsburg, Germany  
927 <sup>119</sup>Division of Biostatistics and Epidemiology, Department of Preventive Medicine,  
928 University of Debrecen, Debrecen, Hungary  
929 <sup>120</sup>Department Health and Prevention, University Greifswald, Greifswald, Germany

- 930 <sup>121</sup>Department of Anaesthesiology and Intensive Care, AUVA Trauma Hospital, Salzburg,  
931 Austria
- 932 <sup>122</sup>Department of Neurology, Elisabeth-TweeSteden Ziekenhuis, Tilburg, the Netherlands
- 933 <sup>123</sup>Department of Neuroanesthesia and Neurointensive Care, Odense University Hospital,  
934 Odense, Denmark
- 935 <sup>124</sup>Department of Neuromedicine and Movement Science, Norwegian University of  
936 Science and Technology, NTNU, Trondheim, Norway
- 937 <sup>125</sup>Department of Physical Medicine and Rehabilitation, St.Olavs Hospital, Trondheim  
938 University Hospital, Trondheim, Norway
- 939 <sup>126</sup>Department of Neurosurgery, University of Pécs, Pécs, Hungary
- 940 <sup>127</sup>Division of Neuroscience Critical Care, John Hopkins University School of Medicine,  
941 Baltimore, USA
- 942 <sup>128</sup>Department of Neuropathology, Queen Elizabeth University Hospital and University of  
943 Glasgow, Glasgow, UK
- 944 <sup>129</sup>Dept. of Department of Biomedical Data Sciences, Leiden University Medical Center,  
945 Leiden, The Netherlands
- 946 <sup>130</sup>Department of Pathophysiology and Transplantation, Milan University, and  
947 Neuroscience ICU, Fondazione IRCCS Cà Granda Ospedale Maggiore Policlinico,  
948 Milano, Italy
- 949 <sup>131</sup>Department of Radiation Sciences, Biomedical Engineering, Umeå University, Umeå,  
950 Sweden
- 951 <sup>132</sup>Perioperative Services, Intensive Care Medicine and Pain Management, Turku  
952 University Hospital and University of Turku, Turku, Finland
- 953 <sup>133</sup>Department of Neurosurgery, Kaunas University of Health Sciences, Kaunas, Lithuania
- 954 <sup>134</sup>Intensive Care and Department of Pediatric Surgery, Erasmus Medical Center, Sophia  
955 Children's Hospital, Rotterdam, The Netherlands
- 956 <sup>135</sup>Department of Neurosurgery, Kings college London, London, UK
- 957 <sup>136</sup>Neurologie, Neurochirurgie und Psychiatrie, Charité – Universitätsmedizin Berlin,  
958 Berlin, Germany
- 959 <sup>137</sup>Department of Intensive Care Adults, Erasmus MC– University Medical Center  
960 Rotterdam, Rotterdam, the Netherlands
- 961 <sup>138</sup>icoMetrix NV, Leuven, Belgium
- 962 <sup>139</sup>Movement Science Group, Faculty of Health and Life Sciences, Oxford Brookes  
963 University, Oxford, UK
- 964 <sup>140</sup>Radiology Department, Antwerp University Hospital, Edegem, Belgium
- 965 <sup>141</sup>Director of Neurocritical Care, University of California, Los Angeles, USA
- 966 <sup>142</sup>Department of Neurosurgery, St.Olavs Hospital, Trondheim University Hospital,  
967 Trondheim, Norway
- 968 <sup>143</sup>Department of Emergency Medicine, University of Florida, Gainesville, Florida, USA
- 969 <sup>144</sup>Department of Neurosurgery, Charité – Universitätsmedizin Berlin, corporate member  
970 of Freie Universität Berlin, Humboldt-Universität zu Berlin, and Berlin Institute of Health,  
971 Berlin, Germany
- 972 <sup>145</sup>VTT Technical Research Centre, Tampere, Finland
- 973 <sup>146</sup>Section of Neurosurgery, Department of Surgery, Rady Faculty of Health Sciences,  
974 University of Manitoba, Winnipeg, MB, Canada
- 975

976 \*Co-lead investigators: [andrew.maas@uza.be](mailto:andrew.maas@uza.be) (AIRM) and [dkm13@cam.ac.uk](mailto:dkm13@cam.ac.uk) (DM)  
977

## 978 **References**

- 979
- 980 1. Stocchetti N, Maas AIR. Traumatic Intracranial Hypertension. *N Engl J Med*  
981 2014;370(22):2121–2130; doi: 10.1056/NEJMra1208708.
- 982 2. Meyfroidt G, Bouzat P, Casaer MP, et al. Management of moderate to severe  
983 traumatic brain injury: an update for the intensivist. *Intensive Care Med*  
984 2022;48(6):649–666; doi: 10.1007/s00134-022-06702-4.
- 985 3. Menon DK, Ercole A. Chapter 14 - Critical care management of traumatic brain injury.  
986 Wijdicks EFM, Kramer AH. eds. *Handb Clin Neurol* 2017;140(Journal Article):239–  
987 274; doi: 10.1016/B978-0-444-63600-3.00014-3.
- 988 4. Stocchetti N, Carbonara M, Citerio G, et al. Severe traumatic brain injury: targeted  
989 management in the intensive care unit. *Lancet Neurol* 2017;16(6):452–464; doi:  
990 10.1016/S1474-4422(17)30118-7.
- 991 5. Hawryluk GWJ, Aguilera S, Buki A, et al. A management algorithm for patients with  
992 intracranial pressure monitoring: the Seattle International Severe Traumatic Brain  
993 Injury Consensus Conference (SIBICC). *Intensive Care Med* 2019;45(12):1783–  
994 1794; doi: 10.1007/s00134-019-05805-9.
- 995 6. Maset AL, Marmarou A, Ward JD, et al. Pressure-volume index in head injury. *J*  
996 *Neurosurg* 1987;67(6):832–840; doi: 10.3171/jns.1987.67.6.0832.
- 997 7. Shore PM, Hand LL, Roy L, et al. Reliability and validity of the Pediatric Intensity  
998 Level of Therapy (PILOT) scale: A measure of the use of intracranial pressure–  
999 directed therapies. *Crit Care Med* 2006;34(7):1981; doi:  
1000 10.1097/01.CCM.0000220765.22184.ED.
- 1001 8. Maas AIR, Harrison-Felix CL, Menon D, et al. Standardizing Data Collection in  
1002 Traumatic Brain Injury. *J Neurotrauma* 2011;28(2):177–187; doi:  
1003 10.1089/neu.2010.1617.
- 1004 9. Zuercher P, Groen JL, Aries MJH, et al. Reliability and Validity of the Therapy  
1005 Intensity Level Scale: Analysis of Clinimetric Properties of a Novel Approach to  
1006 Assess Management of Intracranial Pressure in Traumatic Brain Injury. *J*  
1007 *Neurotrauma* 2016;33(19):1768–1774; doi: 10.1089/neu.2015.4266.
- 1008 10. Robba C, Graziano F, Guglielmi A, et al. Treatments for intracranial hypertension  
1009 in acute brain-injured patients: grading, timing, and association with outcome. Data  
1010 from the SYNAPSE-ICU study. *Intensive Care Med* 2023;49(1):50–61; doi:  
1011 10.1007/s00134-022-06937-1.



- 1012 11. Huijben JA, Wieggers EJA, Lingsma HF, et al. Changing care pathways and  
1013 between-center practice variations in intensive care for traumatic brain injury across  
1014 Europe: a CENTER-TBI analysis. *Intensive Care Med* 2020;46(5):995–1004; doi:  
1015 10.1007/s00134-020-05965-z.
- 1016 12. Huijben JA, Dixit A, Stocchetti N, et al. Use and impact of high intensity  
1017 treatments in patients with traumatic brain injury across Europe: a CENTER-TBI  
1018 analysis. *Crit Care* 2021;25(1):78; doi: 10.1186/s13054-020-03370-y.
- 1019 13. Bhattacharyay S, Caruso PF, Åkerlund C, et al. Mining the contribution of  
1020 intensive care clinical course to outcome after traumatic brain injury. *Npj Digit Med*  
1021 2023;6(1):154; doi: 10.1038/s41746-023-00895-8.
- 1022 14. Zoerle T, Birg T, Carbonara M, et al. Accuracy of Manual Intracranial Pressure  
1023 Recording Compared to a Computerized High-Resolution System: A CENTER-TBI  
1024 Analysis. *Neurocrit Care* 2023; doi: 10.1007/s12028-023-01697-2.
- 1025 15. Maas AIR, Menon DK, Manley GT, et al. Traumatic brain injury: progress and  
1026 challenges in prevention, clinical care, and research. *Lancet Neurol*  
1027 2022;21(11):1004–1060; doi: 10.1016/S1474-4422(22)00309-X.
- 1028 16. Clossen MC, Huijben JA, van der Jagt M, et al. Variation in monitoring and  
1029 treatment policies for intracranial hypertension in traumatic brain injury: a survey in 66  
1030 neurotrauma centers participating in the CENTER-TBI study. *Crit Care*  
1031 2017;21(1):233; doi: 10.1186/s13054-017-1816-9.
- 1032 17. Avila ML, Stinson J, Kiss A, et al. A critical review of scoring options for clinical  
1033 measurement tools. *BMC Res Notes* 2015;8(1):612; doi: 10.1186/s13104-015-1561-  
1034 6.
- 1035 18. Maas AIR, Menon DK, Steyerberg EW, et al. Collaborative European  
1036 NeuroTrauma Effectiveness Research in Traumatic Brain Injury (CENTER-TBI): A  
1037 Prospective Longitudinal Observational Study. *Neurosurgery* 2015;76(1):67–80; doi:  
1038 10.1227/NEU.0000000000000575.
- 1039 19. Steyerberg EW, Wieggers E, Sewalt C, et al. Case-mix, care pathways, and  
1040 outcomes in patients with traumatic brain injury in CENTER-TBI: a European  
1041 prospective, multicentre, longitudinal, cohort study. *Lancet Neurol* 2019;18(10):923–  
1042 934; doi: 10.1016/S1474-4422(19)30232-7.
- 1043 20. Doiron D, Marcon Y, Fortier I, et al. Software Application Profile: Opal and Mica:  
1044 open-source software solutions for epidemiological data management, harmonization  
1045 and dissemination. *Int J Epidemiol* 2017;46(5):1372–1378; doi: 10.1093/ije/dyx180.
- 1046 21. Zeiler FA, Ercole A, Cabeleira M, et al. Patient-specific ICP Epidemiologic  
1047 Thresholds in Adult Traumatic Brain Injury: A CENTER-TBI Validation Study. *J*  
1048 *Neurosurg Anesthesiol* 2021;33(1):28–38; doi: 10.1097/ANA.0000000000000616.

- 1049 22. Marshall LF, Marshall SB, Klauber MR, et al. The diagnosis of head injury  
1050 requires a classification based on computed axial tomography. *J Neurotrauma* 1992;9  
1051 Suppl 1:S287-292.
- 1052 23. Teasdale G, Maas A, Lecky F, et al. The Glasgow Coma Scale at 40 years:  
1053 standing the test of time. *The Lancet Neurology* 2014;13(8):844–854; doi:  
1054 10.1016/S1474-4422(14)70120-6.
- 1055 24. Ercole A, Dixit A, Nelson DW, et al. Imputation strategies for missing baseline  
1056 neurological assessment covariates after traumatic brain injury: A CENTER-TBI  
1057 study. *PLoS ONE* 2021;16(8):e0253425.
- 1058 25. McMillan T, Wilson L, Ponsford J, et al. The Glasgow Outcome Scale - 40 years  
1059 of application and refinement. *Nat Rev Neurol* 2016;12(8):477–485; doi:  
1060 10.1038/nrneurol.2016.89.
- 1061 26. Kunzmann K, Wernisch L, Richardson S, et al. Imputation of Ordinal Outcomes:  
1062 A Comparison of Approaches in Traumatic Brain Injury. *J Neurotrauma*  
1063 2021;38(4):455–463; doi: 10.1089/neu.2019.6858.
- 1064 27. Bhattacharyay S, Milosevic I, Wilson L, et al. The leap to ordinal: Detailed  
1065 functional prognosis after traumatic brain injury with a flexible modelling approach.  
1066 *PLoS ONE* 2022;17(7):e0270973; doi: 10.1371/journal.pone.0270973.
- 1067 28. Boateng GO, Neilands TB, Frongillo EA, et al. Best Practices for Developing and  
1068 Validating Scales for Health, Social, and Behavioral Research: A Primer. *Front Public*  
1069 *Health* 2018;6:149; doi: 10.3389/fpubh.2018.00149.
- 1070 29. Bakdash JZ, Marusich LR. Repeated Measures Correlation. *Front Psychol*  
1071 2017;8:456; doi: 10.3389/fpsyg.2017.00456.
- 1072 30. van Buuren S, Groothuis-Oudshoorn CGM. mice: Multivariate Imputation by  
1073 Chained Equations in R. *J Stat Softw* 2011;45(3):1–67; doi: 10.18637/jss.v045.i03.
- 1074 31. Gravesteijn BY, Sewalt CA, Venema E, et al. Missing Data in Prediction  
1075 Research: A Five-Step Approach for Multiple Imputation, Illustrated in the CENTER-  
1076 TBI Study. *J Neurotrauma* 2021;38(13):1842–1857; doi: 10.1089/neu.2020.7218.
- 1077 32. Honaker J King, G, Blackwell, M. Amelia II: A Program for Missing Data. *J Stat*  
1078 *Softw* 2011;45(7); doi: 10.18637/jss.v045.i07.
- 1079 33. Beqiri E, Smielewski P, Robba C, et al. Feasibility of individualised severe  
1080 traumatic brain injury management using an automated assessment of optimal  
1081 cerebral perfusion pressure: the COGiTATE phase II study protocol. *BMJ Open*  
1082 2019;9(9):e030727; doi: 10.1136/bmjopen-2019-030727.
- 1083 34. Tas J, Beqiri E, van Kaam RC, et al. Targeting Autoregulation-Guided Cerebral  
1084 Perfusion Pressure after Traumatic Brain Injury (COGiTATE): A Feasibility

- 1085 Randomized Controlled Clinical Trial. *J Neurotrauma* 2021;38(20):2790–2800; doi:  
1086 10.1089/neu.2021.0197.
- 1087 35. van Erp IAM, van Essen TA, Fluiter K, et al. Safety and efficacy of C1-inhibitor in  
1088 traumatic brain injury (CIAO@TBI): study protocol for a randomized, placebo-  
1089 controlled, multi-center trial. *Trials* 2021;22(1):874; doi: 10.1186/s13063-021-05833-  
1090 1.
- 1091 36. Schreiber JB. Issues and recommendations for exploratory factor analysis and  
1092 principal component analysis. *Res Soc Adm Pharm* 2021;17(5):1004–1011; doi:  
1093 10.1016/j.sapharm.2020.07.027.
- 1094 37. Clark D, Joannides A, Adeleye AO, et al. Casemix, management, and mortality of  
1095 patients receiving emergency neurosurgery for traumatic brain injury in the Global  
1096 Neurotrauma Outcomes Study: a prospective observational cohort study. *Lancet*  
1097 *Neurol* 2022;21(5):438–449; doi: 10.1016/S1474-4422(22)00037-0.
- 1098 38. Okonkwo DO, Shutter LA, Moore C, et al. Brain Oxygen Optimization in Severe  
1099 Traumatic Brain Injury Phase-II: A Phase II Randomized Trial\*. *Crit Care Med*  
1100 2017;45(11):1907; doi: 10.1097/CCM.0000000000002619.
- 1101 39. Hutchinson PJ, Jalloh I, Helmy A, et al. Consensus statement from the 2014  
1102 International Microdialysis Forum. *Intensive Care Med* 2015;41(9):1517–1528; doi:  
1103 10.1007/s00134-015-3930-y.
- 1104 40. Yokobori S, Yokota H. Targeted temperature management in traumatic brain  
1105 injury. *J Intensive Care* 2016;4(1):28; doi: 10.1186/s40560-016-0137-4.
- 1106 41. Hutchinson PJ, Kolias AG, Timofeev IS, et al. Trial of Decompressive  
1107 Craniectomy for Traumatic Intracranial Hypertension. *N Engl J Med*  
1108 2016;375(12):1119–1130; doi: 10.1056/NEJMoa1605215.
- 1109

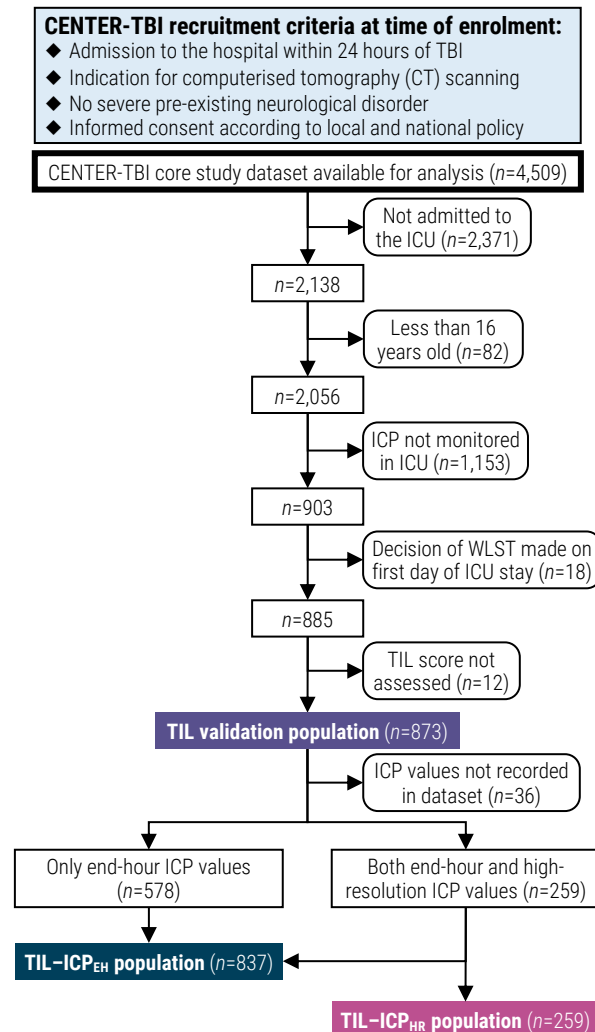

**Fig. 1. Flow diagram for patient enrolment and validation population assignment.** Abbreviations: CENTER-TBI=Collaborative European NeuroTrauma Effectiveness Research in TBI, ICP=intracranial pressure, ICP<sub>EH</sub>=end-hour ICP, ICP<sub>HR</sub>=high-resolution ICP, ICU=intensive care unit, TBI=traumatic brain injury, TIL=Therapy Intensity Level scale,<sup>8,9</sup> WLST=withdrawal of life-sustaining therapies.

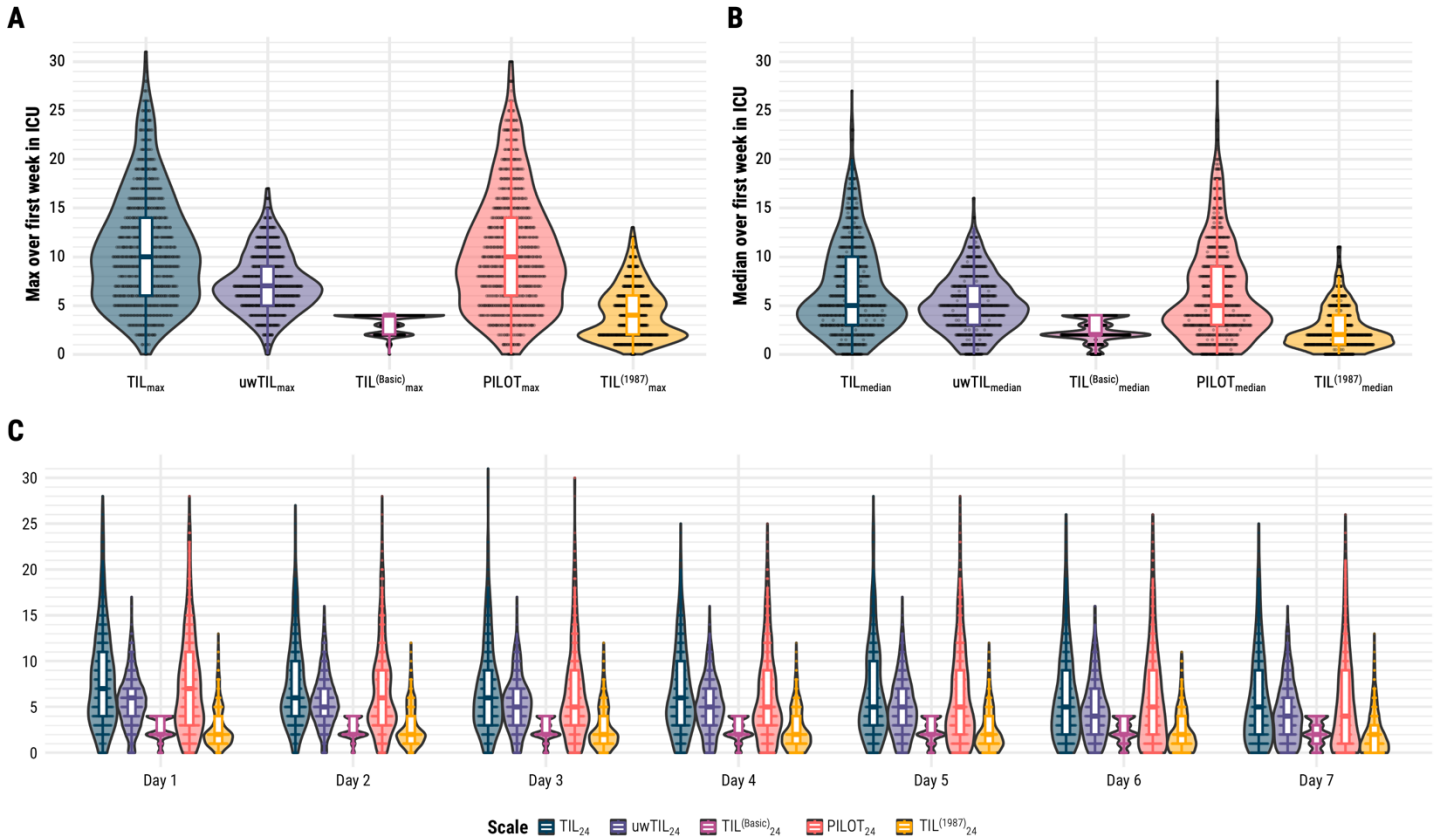

**Fig. 2. Distributions of TIL and alternative scales.** Abbreviations: ICU=intensive care unit, PILOT=Paediatric Intensity Level of Therapy scale,<sup>7</sup> TIL=Therapy Intensity Level scale,<sup>8,9</sup> TIL<sup>(1987)</sup>=original Therapy Intensity Level scale published in 1987,<sup>6</sup> TIL<sup>(Basic)</sup>=condensed TIL scale,<sup>8</sup> uwTIL=unweighted TIL scale in which sub-item scores are replaced by the ascending rank index within the item. The numeric definition of each scale is listed in Table 1. **(A)** Distributions of maximum scores of TIL (i.e., TIL<sub>max</sub>) and alternative scales (i.e., uwTIL<sub>max</sub>, TIL<sup>(Basic)</sup><sub>max</sub>, PILOT<sub>max</sub>, and TIL<sup>(1987)</sup><sub>max</sub>) over the first week of ICU stay. **(B)** Distribution of median scores of TIL (i.e., TIL<sub>median</sub>) and alternative scales (i.e., uwTIL<sub>median</sub>, TIL<sup>(Basic)</sup><sub>median</sub>, PILOT<sub>median</sub>, and TIL<sup>(1987)</sup><sub>median</sub>) over the first week of ICU stay. **(C)** Distributions of daily scores of TIL (i.e., TIL<sub>24</sub>) and alternative scales (i.e., uwTIL<sub>24</sub>, TIL<sup>(Basic)</sup><sub>24</sub>, PILOT<sub>24</sub>, and TIL<sup>(1987)</sup><sub>24</sub>) over the first week of ICU stay.

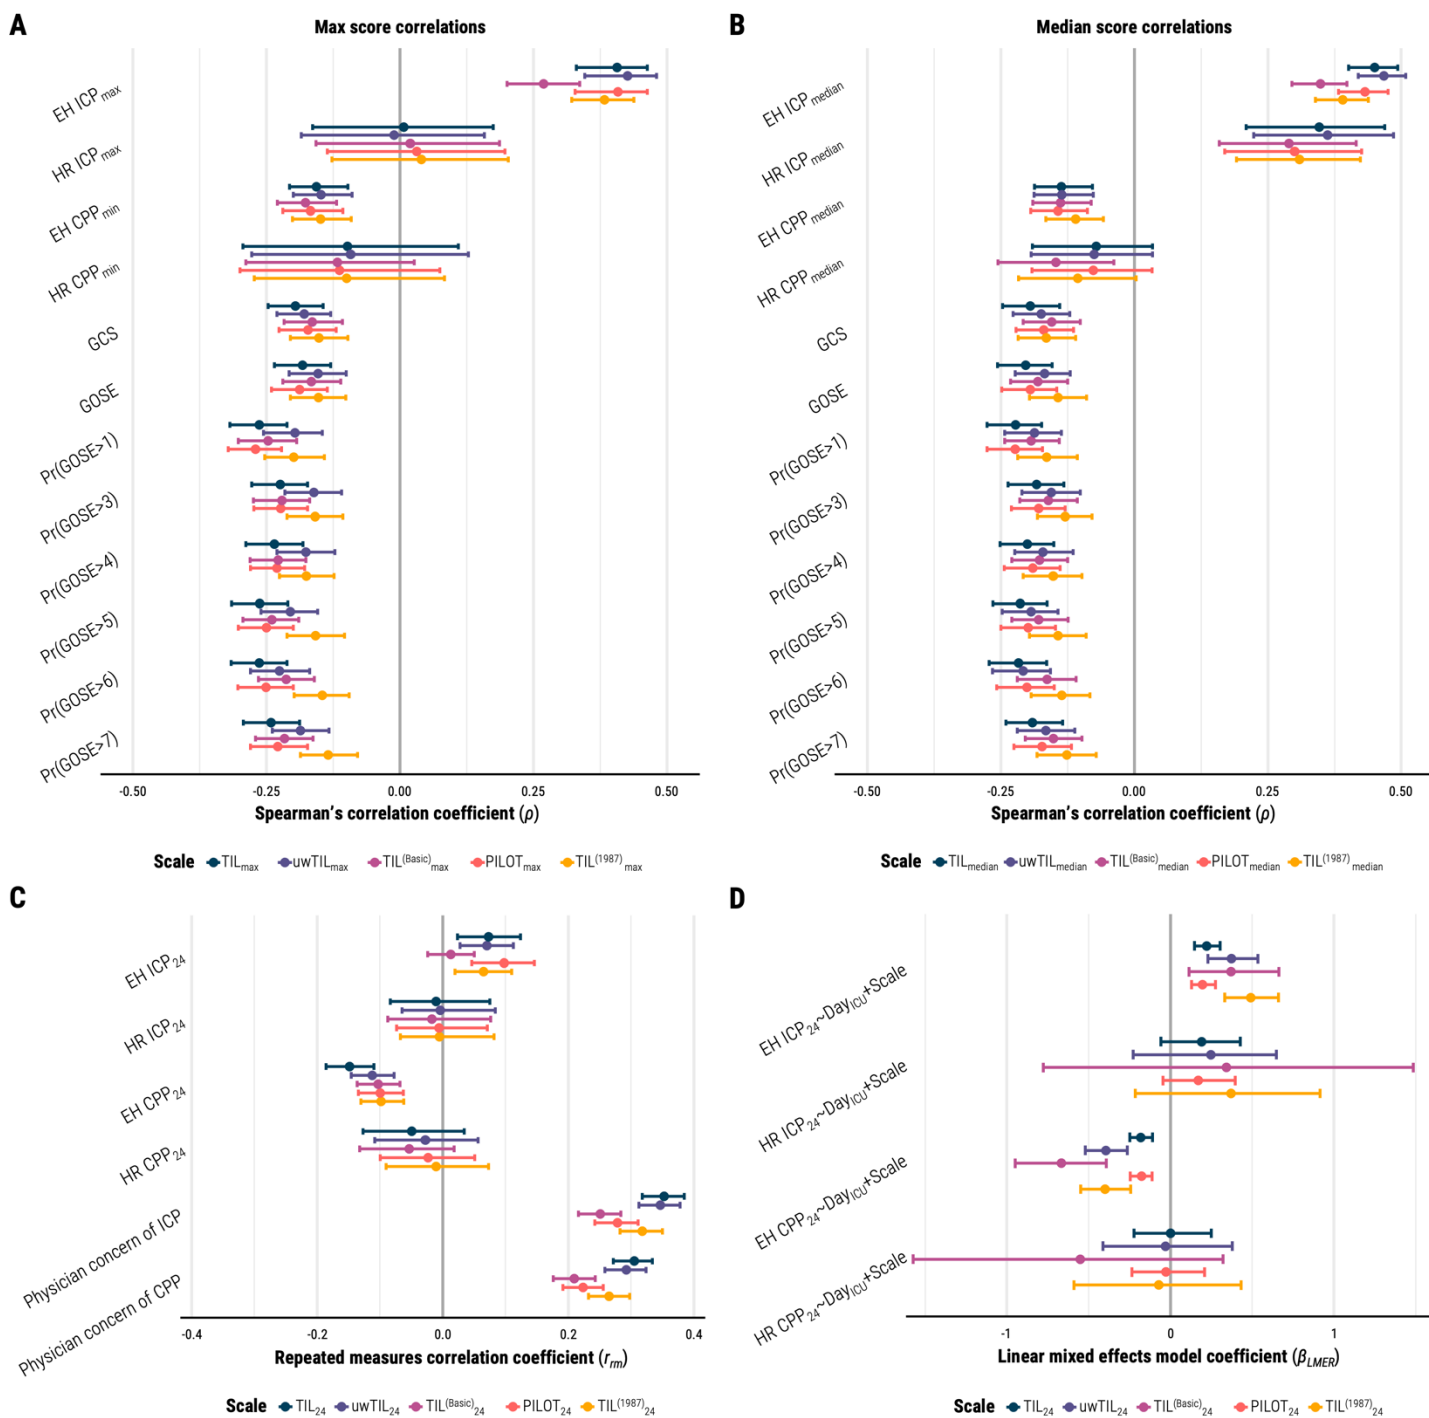

**Fig. 3. Associations of TIL and alternative scales with other clinical measures.**

Abbreviations: Day<sub>ICU</sub>=variable representing day (from 1 to 7) of ICU stay, EH=end-hour, CPP=cerebral perfusion pressure, GCS=Glasgow Coma Scale at ICU admission, GOSE=Glasgow Outcome Scale–Extended at six months post-injury, HR=high-resolution, ICP=intracranial pressure, ICU=intensive care unit, PILOT=Paediatric Intensity Level of Therapy scale,<sup>7</sup> Pr(GOSE>•)="probability of GOSE greater than • at six months post-injury" as previously calculated from the first 24 hours of admission,<sup>27</sup> TIL=Therapy Intensity Level scale,<sup>8,9</sup> TIL<sup>(1987)</sup>=original Therapy Intensity Level scale published in 1987,<sup>6</sup> TIL<sup>(Basic)</sup>=condensed TIL scale,<sup>8</sup> uwTIL=unweighted TIL scale in which sub-item scores are replaced by the ascending rank index

within the item. The numeric definition of each scale is listed in Table 1, and the calculation of daily (e.g.,  $TIL_{24}$ ), maximum (e.g.,  $TIL_{max}$ ), and median (e.g.,  $TIL_{median}$ ) scores are described in the Methods. The bars represent 95% confidence intervals derived from bootstrapping with 1,000 resamples of unique patients over 100 missing value imputations. **(A)** Spearman's correlation coefficients ( $\rho$ ) between maximum scale scores over first week of ICU stay (i.e.,  $TIL_{max}$ ,  $uwTIL_{max}$ ,  $TIL_{max}^{(Basic)}$ ,  $PILOT_{max}$ , and  $TIL_{max}^{(1987)}$ ) and other clinical measures. **(B)** Spearman's correlation coefficients ( $\rho$ ) between median scale scores over first week of ICU stay (i.e.,  $TIL_{median}$ ,  $uwTIL_{median}$ ,  $TIL_{median}^{(Basic)}$ ,  $PILOT_{median}$ , and  $TIL_{median}^{(1987)}$ ) and other clinical measures. **(C)** Repeated measures correlation coefficients ( $r_m$ , from -1 to 1) are interpreted as the strength and direction of association between two variables after accounting for inter-patient variation. **(D)** Linear mixed effects model coefficients ( $\beta_{LMER}$ ) are interpreted as the expected difference in dependent variable (e.g., EH ICP<sub>24</sub>) per unit increase of daily scale score (e.g.,  $TIL_{24}$ ) after accounting for time since ICU admission (i.e.,  $Day_{ICU}$ ) and inter-patient variation.

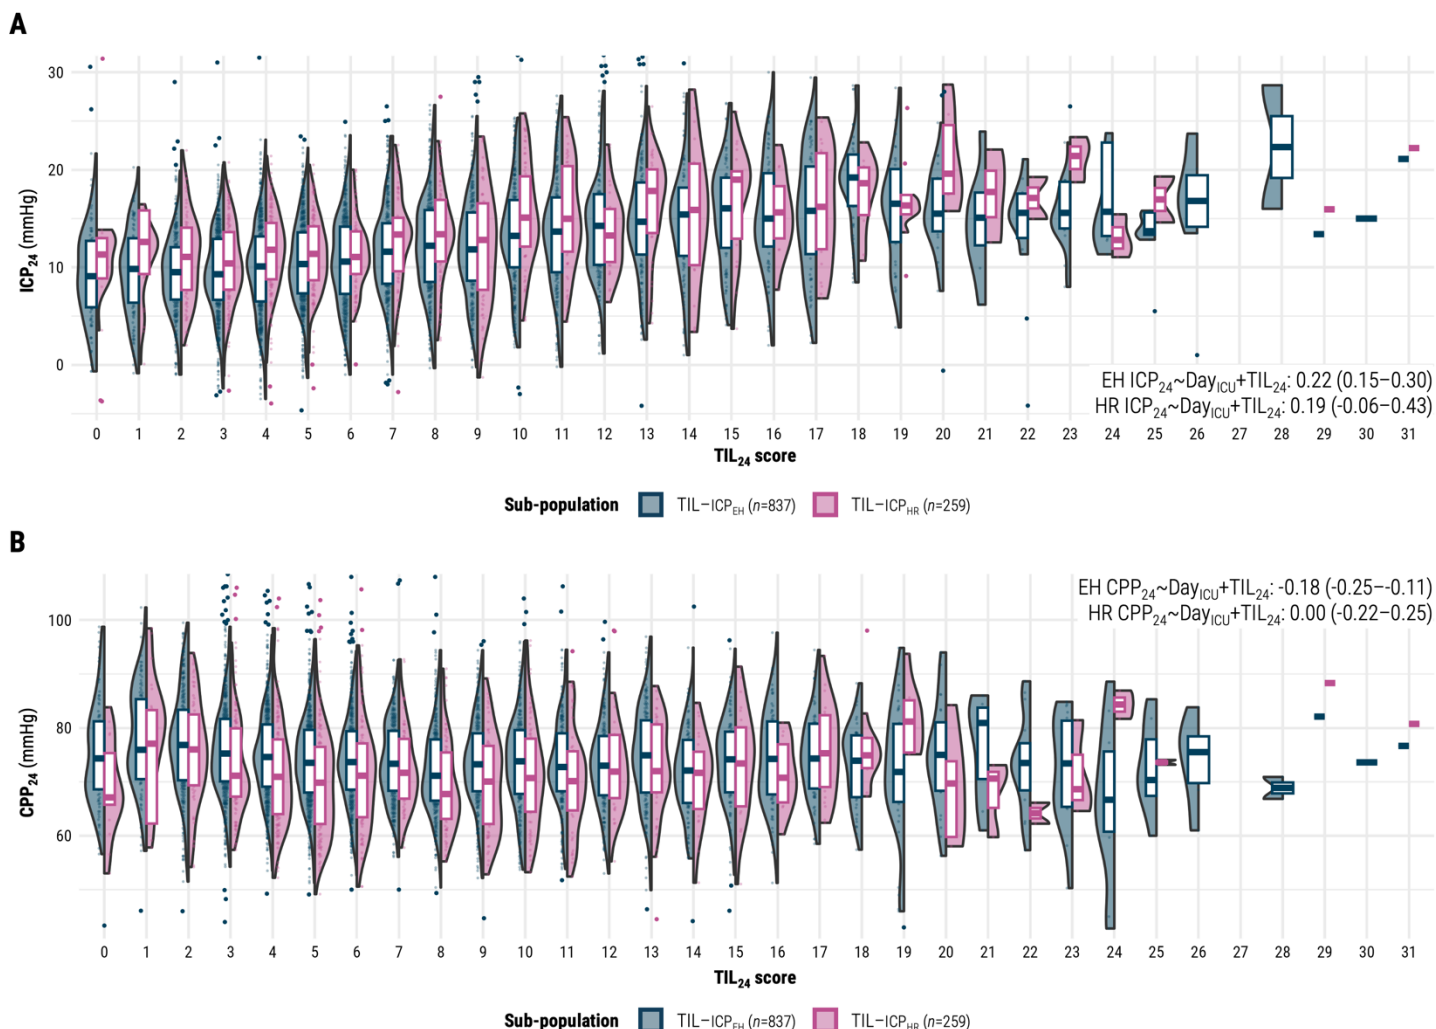

**Fig 4. Distributions of daily intracranial pressure and cerebral perfusion pressure means per daily TIL score.** Abbreviations: CPP=cerebral perfusion pressure, CPP<sub>24</sub>=mean CPP over calendar day, Day<sub>ICU</sub>=variable representing day (from 1 to 7) of ICU stay, EH=end-hour, HR=high-resolution, ICP=intracranial pressure, ICP<sub>24</sub>=mean ICP over calendar day, TIL=Therapy Intensity Level scale,<sup>8,9</sup> TIL<sub>24</sub>=TIL score of calendar day, TIL-ICP<sub>EH</sub>=end-hour ICP sub-population, TIL-ICP<sub>HR</sub>=high-resolution ICP sub-population. The values in each panel are the linear mixed effects model coefficients ( $\beta_{LMER}$ ) of TIL<sub>24</sub> with 95% confidence intervals derived from bootstrapping with 1,000 resamples of unique patients over 100 missing value imputations. The width of violin plots is scaled for each population, but the width of the points inside them demonstrates relative frequency across the populations. The violin plots do not encompass outliers based on 1.5 times the interquartile range. **(A)** Distributions of ICP<sub>24</sub> vs. TIL<sub>24</sub> for both sub-populations. **(B)** Distributions of CPP<sub>24</sub> vs. TIL<sub>24</sub> for both sub-populations.



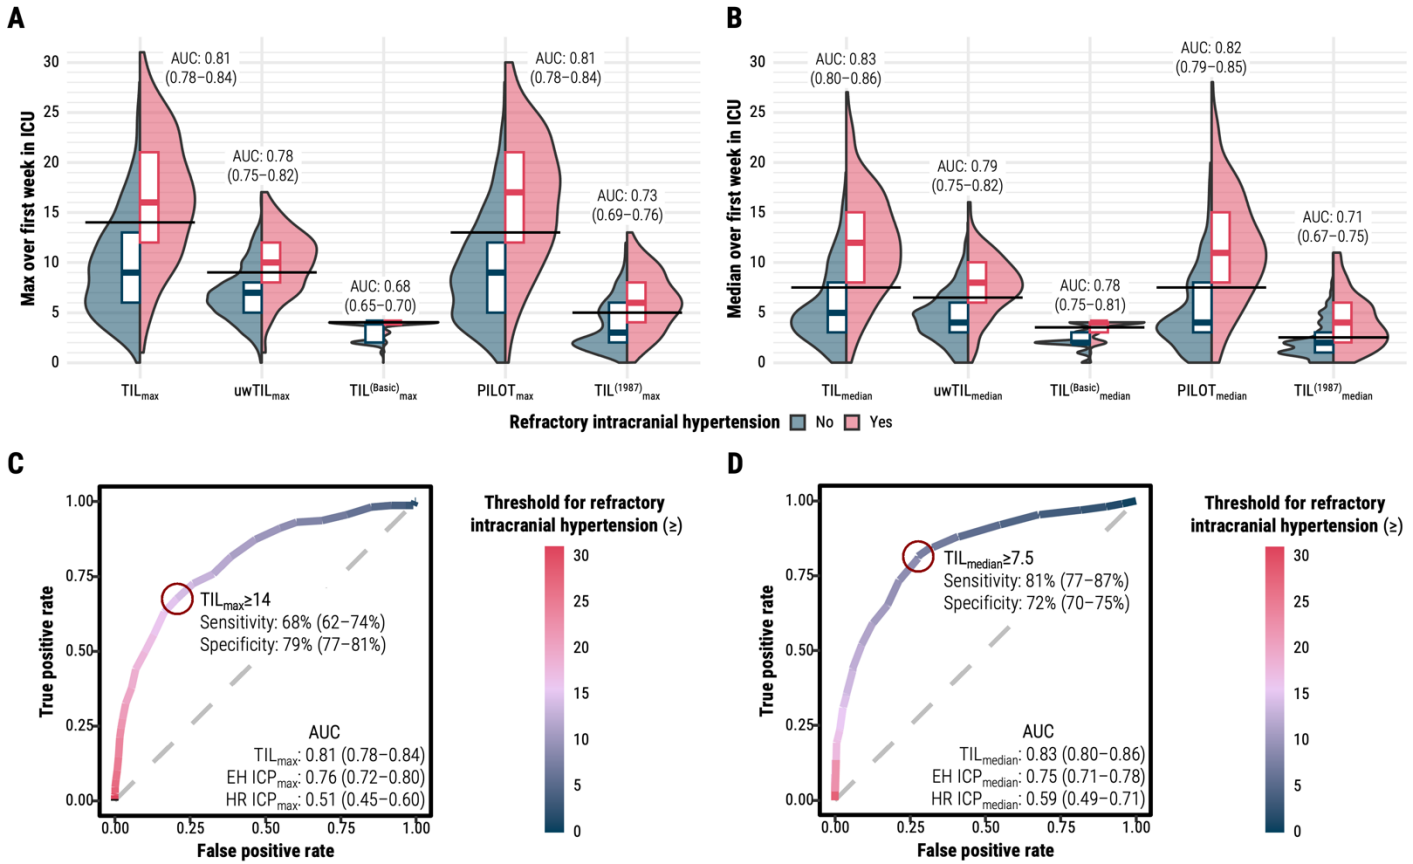

**Fig 5. Discrimination of refractory intracranial hypertension status by TIL and alternative scale summary scores.** Abbreviations: AUC=area under the receiver operating characteristic curve, EH=end-hour, HR=high-resolution, ICP=intracranial pressure, ICP<sub>max</sub>=maximum calendar day mean of ICP over first week of ICU stay, ICP<sub>median</sub>=median calendar day mean of ICP over first week of ICU stay, ICU=intensive care unit, PILOT=Paediatric Intensity Level of Therapy scale,<sup>7</sup> TIL=Therapy Intensity Level scale,<sup>8,9</sup> TIL<sup>(1987)</sup>=original Therapy Intensity Level scale published in 1987,<sup>6</sup> TIL<sup>(Basic)</sup>=condensed TIL scale,<sup>8</sup> uwTIL=unweighted TIL scale in which sub-item scores are replaced by the ascending rank index within the item. The 95% confidence intervals of AUC were derived from bootstrapping with 1,000 resamples of unique patients over 100 missing value imputations. **(A)** Distributions of maximum scores of TIL (i.e., TIL<sub>max</sub>) and alternative scales (i.e., uwTIL<sub>max</sub>, TIL<sup>(Basic)</sup><sub>max</sub>, PILOT<sub>max</sub>, and TIL<sup>(1987)</sup><sub>max</sub>) stratified by refractory intracranial hypertension status. The horizontal black line segments represent the thresholds which maximised the sum of sensitivity and specificity for each scale. **(B)** Distributions of median scores of TIL (i.e., TIL<sub>median</sub>) and alternative scales (i.e., uwTIL<sub>median</sub>, TIL<sup>(Basic)</sup><sub>median</sub>, PILOT<sub>median</sub>, and TIL<sup>(1987)</sup><sub>median</sub>) stratified by refractory intracranial hypertension status. The horizontal black line segments represent the thresholds which maximised the sum of sensitivity and specificity for each scale. **(C)** Receiver operating characteristic curve of refractory intracranial hypertension detection with TIL<sub>max</sub>. The threshold which maximised the sum of sensitivity and specificity is highlighted with the dark red circle. **(D)** Receiver operating characteristic curve of refractory intracranial hypertension detection with TIL<sub>median</sub>. The threshold which maximised the sum of sensitivity and specificity is highlighted with the dark red circle.

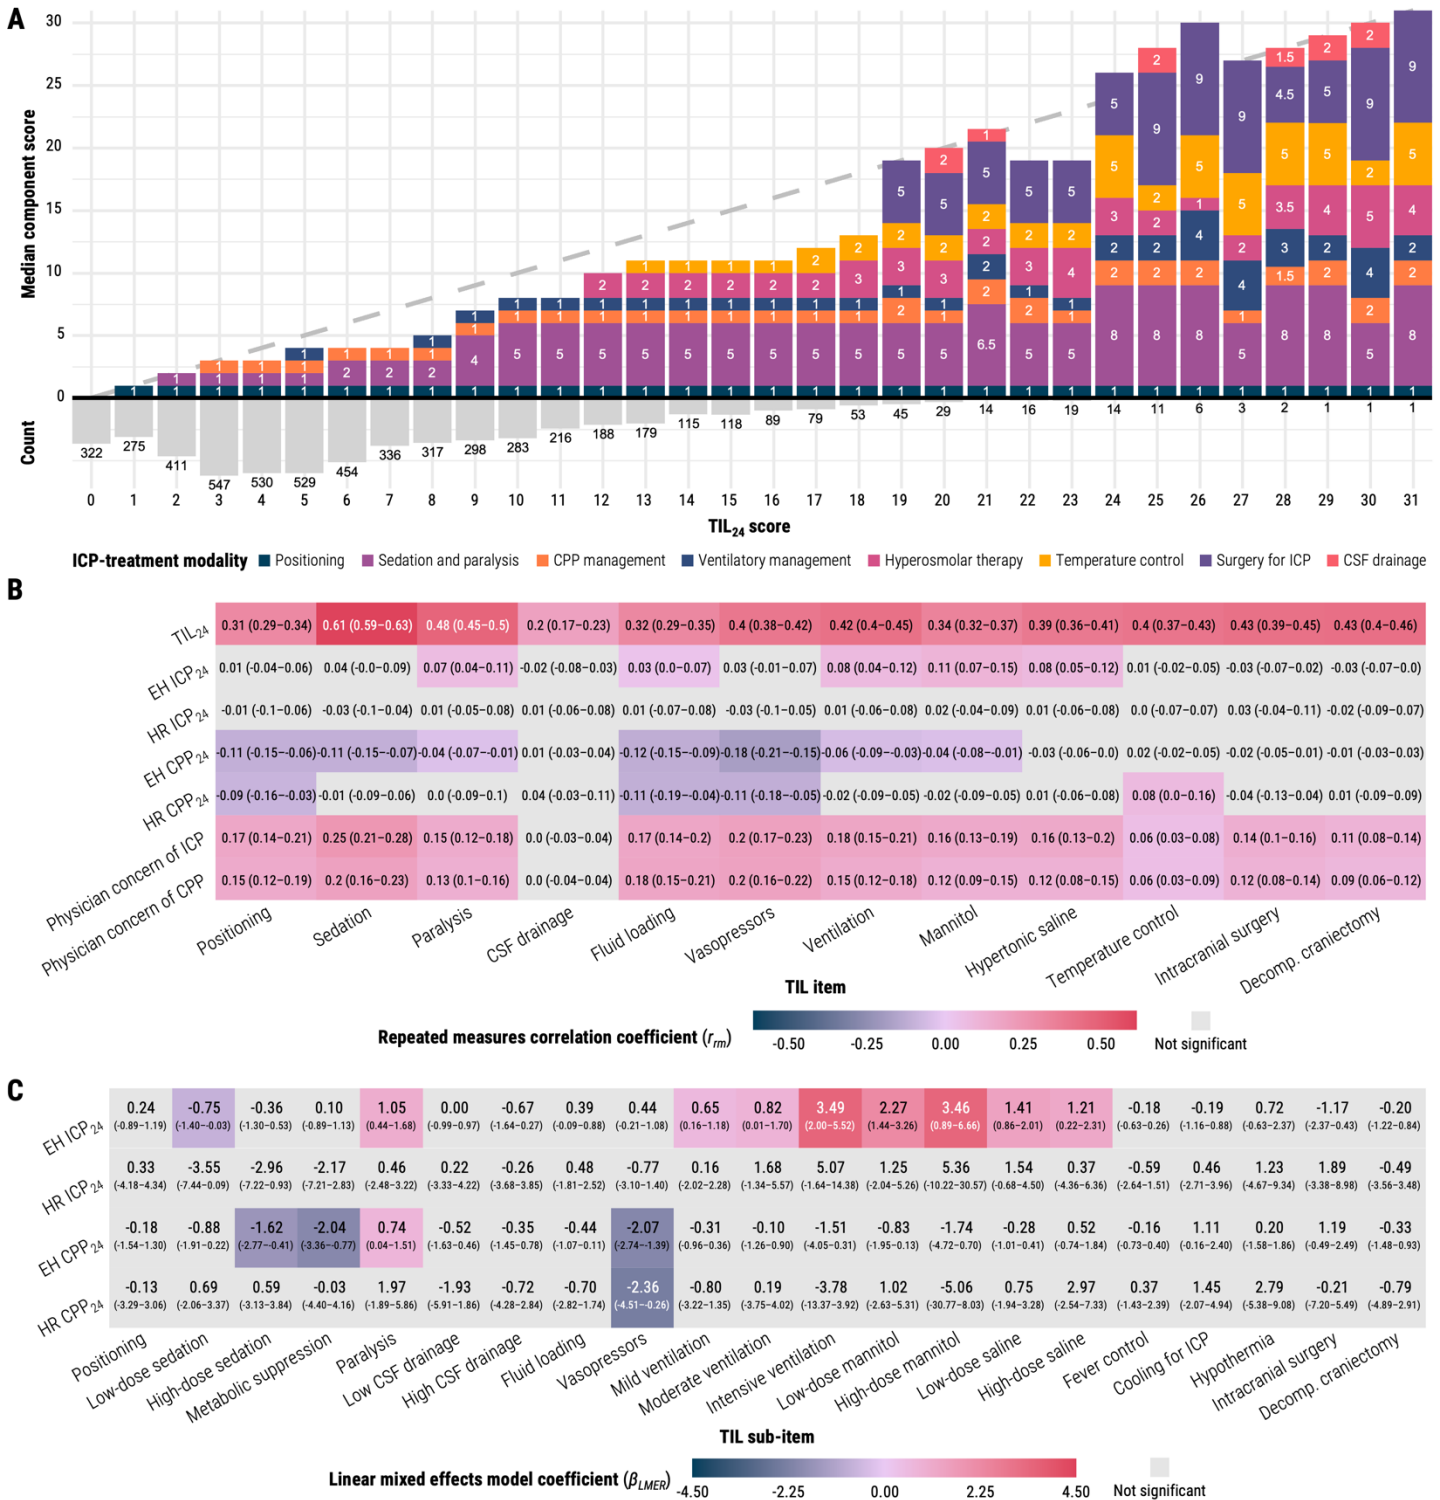

**Fig 6. Association of TIL component items with TIL<sub>24</sub> and other study measures.** Abbreviations: CPP=cerebral perfusion pressure, CPP<sub>24</sub>=mean CPP over calendar day, CSF=cerebrospinal fluid, EH=end-hour, HR=high-resolution, ICP=intracranial pressure, ICP<sub>24</sub>=mean ICP over calendar day, ICU=intensive care unit, TIL=Therapy Intensity Level scale,<sup>8,9</sup> TIL<sub>24</sub>=TIL score of calendar day. The 95% confidence intervals of  $r_{rm}$  and  $\beta_{LMER}$  values were derived from bootstrapping with 1,000 resamples of unique patients over 100 missing value

imputations. **(A)** Median component score of each ICP-treatment modality (Table 1) per each TIL<sub>24</sub> score. The histogram under the x-axis represents the relative frequency and count of each TIL<sub>24</sub> score in the population, and diagonal dashed line represents the TIL<sub>24</sub> score on both axes. If the sum of median item scores does not equal the corresponding TIL<sub>24</sub> score, this can be interpreted as high variability in the combination of simultaneously applied therapies at that TIL<sub>24</sub> score. **(B)** The repeated measures correlation coefficients ( $r_{rm}$ , from -1 to 1) are interpreted as the strength and direction of association between two variables after accounting for inter-patient variation. The component score of each item (Table 1, x-axis) was subtracted from the TIL<sub>24</sub> score (top row on y-axis) before calculating their  $r_{rm}$  values. **(C)** Linear mixed effects model coefficients ( $\beta_{LMER}$ ) are interpreted as the expected difference in the dependent variable (y-axis) associated with the given TIL<sub>24</sub> sub-item treatment (Table 1) after accounting for all other TIL<sub>24</sub> sub-items, time since ICU admission, and inter-patient variation.

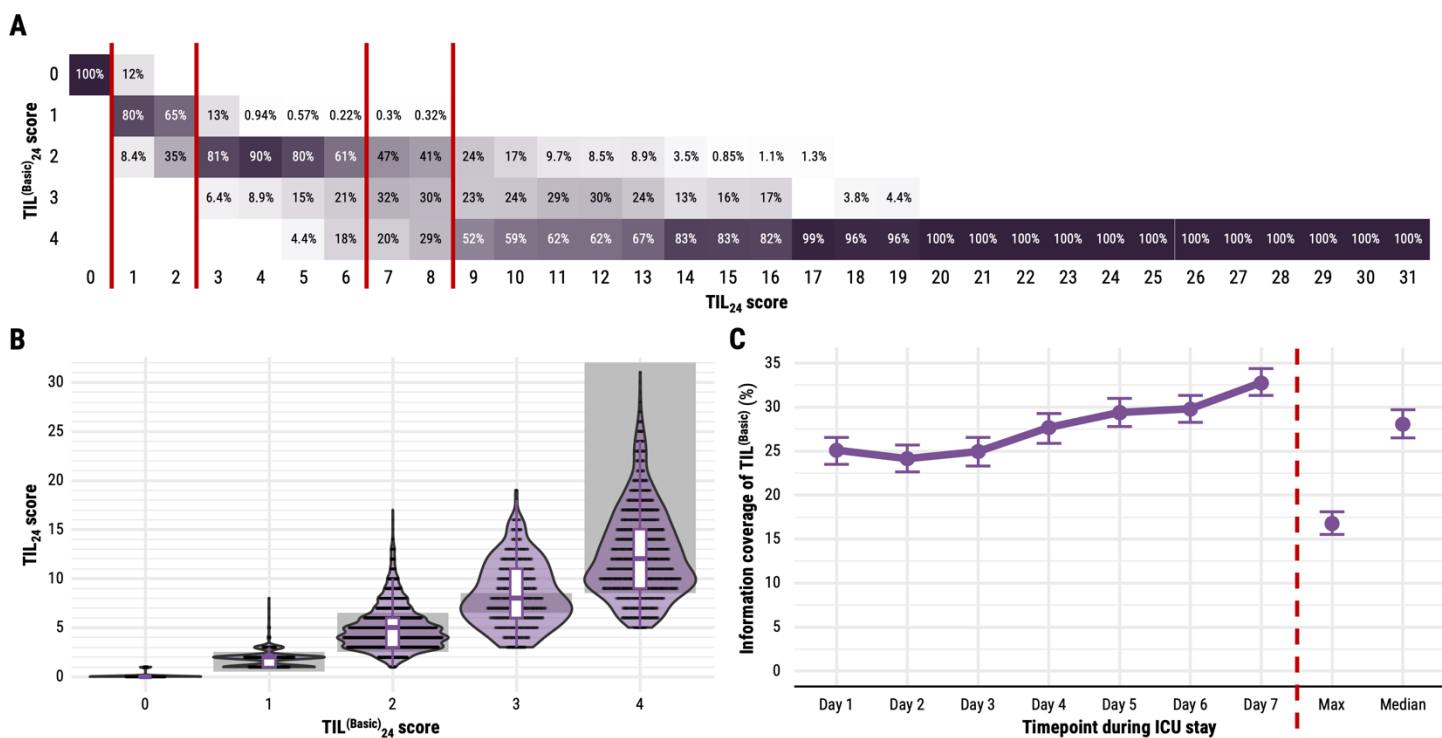

**Fig 7. Relationship between TIL and TIL<sup>(Basic)</sup>.** Abbreviations: AUC=area under the receiver operating characteristic curve, ICU=intensive care unit, TIL=Therapy Intensity Level scale,<sup>8,9</sup> TIL<sup>(Basic)</sup>=condensed TIL scale.<sup>8</sup> The numeric definition of each scale is listed in Table 1, and the calculation of daily (e.g., TIL<sub>24</sub>), maximum (e.g., TIL<sub>max</sub>), and median (e.g., TIL<sub>median</sub>) scores are described in the Methods. The 95% confidence intervals of information coverage were derived from bootstrapping with 1,000 resamples of unique patients over 100 missing value imputations. **(A)** Distribution of corresponding TIL<sup>(Basic)</sup><sub>24</sub> scores per each TIL<sub>24</sub> score. The values in each cell represent the percent of assessments at a given TIL<sub>24</sub> score (i.e., column) corresponding to a TIL<sup>(Basic)</sup><sub>24</sub> score (i.e., row). The vertical, dark red lines represent cut-offs across which the median corresponding TIL<sup>(Basic)</sup><sub>24</sub> score per TIL<sub>24</sub> score changes. **(B)** Distribution of corresponding TIL<sub>24</sub> scores per each TIL<sup>(Basic)</sup><sub>24</sub> score. The width of violin plots is scaled for each TIL<sup>(Basic)</sup><sub>24</sub> score, but the width of the points inside them demonstrates relative frequency across the TIL<sup>(Basic)</sup><sub>24</sub> scores. The grey, shaded zones represent the range of TIL<sub>24</sub> scores with corresponding median TIL<sup>(Basic)</sup><sub>24</sub> scores on the x-axis, as determined in panel (A). **(C)** The information of TIL<sub>24</sub>, TIL<sub>max</sub>, and TIL<sub>median</sub> covered by TIL<sup>(Basic)</sup><sub>24</sub>, TIL<sup>(Basic)</sup><sub>max</sub>, and TIL<sup>(Basic)</sup><sub>median</sub>, respectively. Information coverage is defined as the mutual information of TIL<sub>24</sub> and TIL<sup>(Basic)</sup><sub>24</sub> (or TIL<sub>max</sub> and TIL<sup>(Basic)</sup><sub>max</sub> or TIL<sub>median</sub> and TIL<sup>(Basic)</sup><sub>median</sub>) divided by the entropy of TIL<sub>24</sub> (or TIL<sub>max</sub> or TIL<sub>median</sub>).

**Table 1. Scoring configurations for TIL and alternative scales**

| ICP-treatment modality              | Item<br>Sub-item                                                            | TIL   |     | uwTIL |     | TIL <sup>(Basic)a</sup> | PILOT <sup>b</sup> |     | TIL <sup>(1987)b</sup> |     |
|-------------------------------------|-----------------------------------------------------------------------------|-------|-----|-------|-----|-------------------------|--------------------|-----|------------------------|-----|
|                                     |                                                                             | Score | Max | Score | Max | Score <sup>a</sup>      | Score              | Max | Score                  | Max |
| Positioning                         | Head elevation for ICP control or nursed flat (180°) for CPP management     | 1     | 1   | 1     | 1   | 1                       | –                  | –   | –                      | –   |
| Sedation and neuromuscular blockade | Sedation                                                                    |       | 5   |       | 3   |                         |                    | 5   |                        | 4   |
|                                     | Low dose sedation (as required for mechanical ventilation)                  | 1     |     | 1     |     | 1                       | 1                  |     | 1                      |     |
|                                     | Higher dose sedation for ICP control (but not aiming for burst suppression) | 2     |     | 2     |     | 2                       | 1                  |     | 1                      |     |
|                                     | High dose propofol or barbiturates for ICP control (metabolic suppression)  | 5     |     | 3     |     | 4                       | 5                  |     | 4                      |     |
|                                     | Neuromuscular blockade (paralysis)                                          | 3     | 3   | 1     | 1   | –                       | 2                  | 2   | 1                      | 1   |
| CSF drainage                        | CSF drainage volume                                                         |       | 3   |       | 2   |                         |                    | 5   |                        | 2   |
|                                     | Low (<120 ml/24h)                                                           | 2     |     | 1     |     | 2                       | 4                  |     | 1                      |     |
|                                     | High (≥120 ml/24h)                                                          | 3     |     | 2     |     | 3                       | 5                  |     | 2                      |     |
| CPP management                      | Fluid loading for maintenance of cerebral perfusion                         | 1     | 1   | 1     | 1   | 2                       | –                  | –   | –                      | –   |
|                                     | Vasopressor therapy required for management of cerebral perfusion           | 1     | 1   | 1     | 1   | 2                       | 2                  | 2   | –                      | –   |
| Ventilatory management              | Hypocapnia for ICP control (P <sub>a</sub> CO <sub>2</sub> [mmHg])          |       | 4   |       | 3   |                         |                    | 4   |                        | 2   |
|                                     | Mild (35≤P <sub>a</sub> CO <sub>2</sub> <40)                                | 1     |     | 1     |     | 2                       | 1                  |     | 1                      |     |
|                                     | Moderate (30≤P <sub>a</sub> CO <sub>2</sub> <35)                            | 2     |     | 2     |     | 3                       | 2                  |     | 1                      |     |
|                                     | Intensive (P <sub>a</sub> CO <sub>2</sub> <30)                              | 4     |     | 3     |     | 4                       | 4                  |     | 2                      |     |
| Hyperosmolar therapy                | Mannitol administration                                                     |       | 3   |       | 2   |                         |                    | 3   |                        | 6   |
|                                     | ≤2g/kg/24h                                                                  | 2     |     | 1     |     | 2                       | 2                  |     | 3                      |     |
|                                     | >2g/kg/24h                                                                  | 3     |     | 2     |     | 3                       | 3                  |     | 6                      |     |
|                                     | Hypertonic saline administration                                            |       | 3   |       | 2   |                         |                    | 3   |                        | –   |
|                                     | ≤0.3g/kg/24h                                                                | 2     |     | 1     |     | 2                       | 3                  |     | –                      |     |
|                                     | >0.3g/kg/24h                                                                | 3     |     | 2     |     | 3                       | 3                  |     | –                      |     |
| Temperature control                 | Temperature control (T [°C])                                                |       | 5   |       | 3   |                         |                    | 5   |                        | –   |
|                                     | Fever control (>38 or spontaneous <34.5)                                    | 1     |     | 1     |     |                         | 1                  |     | –                      |     |
|                                     | Cooling for ICP control (≥35)                                               | 2     |     | 2     |     | 3                       | 3                  |     | –                      |     |
|                                     | Hypothermia (<35)                                                           | 5     |     | 3     |     | 4                       | 5                  |     | –                      |     |

|                                       |                                                                                |    |   |    |   |   |    |   |    |   |
|---------------------------------------|--------------------------------------------------------------------------------|----|---|----|---|---|----|---|----|---|
| Surgery for intracranial hypertension | Intracranial operation for progressive mass lesion, NOT scheduled on admission | 4  | 4 | 1  | 1 | 4 | 4  | 4 | –  | – |
|                                       | Decompressive craniectomy                                                      | 5  | 5 | 1  | 1 | 4 | 5  | 5 | –  | – |
| <b>Maximum total possible score</b>   |                                                                                | 38 |   | 21 |   | 4 | 38 |   | 15 |   |

Abbreviations: CPP=cerebral perfusion pressure, CSF=cerebrospinal fluid, ICP=intracranial pressure,  $P_aCO_2$ =partial pressure of carbon dioxide in arterial blood, PILOT=Paediatric Intensity Level of Therapy scale,<sup>7</sup> T=body temperature in degrees Celsius, TIL=Therapy Intensity Level scale,<sup>8,9</sup> TIL<sup>(1987)</sup>=original Therapy Intensity Level scale published in 1987,<sup>6</sup> TIL<sup>(Basic)</sup>=condensed TIL scale,<sup>8</sup> uwTIL=unweighted TIL scale in which sub-item scores are replaced by the ascending rank index within the item.

The TIL scale was developed by Maas *et al.*<sup>8</sup> For each calendar day, the highest score for each item was summed to derive the TIL score.

<sup>a</sup>TIL<sup>(Basic)</sup> is the maximum score (up to 4) among all administered sub-items over the calendar day.

If no sub-items are administered on a given day, TIL<sup>(Basic)</sup>=0.

<sup>b</sup>PILOT scale<sup>7</sup> and TIL<sup>(1987)</sup> scale<sup>6</sup> scoring configurations have been adapted with minor adjustments to fit the items of TIL with a daily assessment frequency.

**Table 2. Summary characteristics of study validation populations**

| Summary characteristic                                               | TIL validation population      |                                              |                                              | p-value <sup>c</sup> |
|----------------------------------------------------------------------|--------------------------------|----------------------------------------------|----------------------------------------------|----------------------|
|                                                                      | Overall<br>(n=873, 52 centres) | TIL-ICP <sub>EH</sub><br>(n=837, 51 centres) | TIL-ICP <sub>HR</sub><br>(n=259, 21 centres) |                      |
| Age [years]                                                          | 47 (29–62)                     | 47 (29–62)                                   | 48 (30–62.5)                                 | 0.303                |
| Sex: Female                                                          | 222 (25%)                      | 213 (25%)                                    | 55 (21%)                                     | 0.078                |
| Baseline GCS (n <sup>a</sup> =822)                                   |                                |                                              |                                              | 0.554                |
| Mild [13–15]                                                         | 122 (15%)                      | 115 (15%)                                    | 38 (16%)                                     |                      |
| Moderate [9–12]                                                      | 139 (17%)                      | 133 (17%)                                    | 36 (15%)                                     |                      |
| Severe [3–8]                                                         | 561 (68%)                      | 539 (68%)                                    | 170 (70%)                                    |                      |
| Marshall CT (n <sup>a</sup> =710)                                    |                                |                                              |                                              | 0.278                |
| No visible pathology (I)                                             | 17 (2%)                        | 16 (2%)                                      | 6 (3%)                                       |                      |
| Diffuse injury II                                                    | 264 (37%)                      | 248 (36%)                                    | 75 (35%)                                     |                      |
| Diffuse injury III                                                   | 93 (13%)                       | 89 (13%)                                     | 22 (10%)                                     |                      |
| Diffuse injury IV                                                    | 16 (2%)                        | 16 (2%)                                      | 3 (1%)                                       |                      |
| Mass lesion (V & VI)                                                 | 320 (45%)                      | 312 (46%)                                    | 107 (50%)                                    |                      |
| Six-month GOSE (n <sup>a</sup> =761)                                 |                                |                                              |                                              | 0.329                |
| (1) Death                                                            | 199 (26%)                      | 195 (26%)                                    | 54 (23%)                                     |                      |
| (2 or 3) Vegetative or lower SD                                      | 182 (24%)                      | 181 (25%)                                    | 63 (27%)                                     |                      |
| (4) Upper SD                                                         | 70 (9%)                        | 66 (9%)                                      | 22 (9%)                                      |                      |
| (5) Lower MD                                                         | 122 (16%)                      | 117 (16%)                                    | 44 (19%)                                     |                      |
| (6) Upper MD                                                         | 74 (10%)                       | 71 (10%)                                     | 23 (10%)                                     |                      |
| (7) Lower GR                                                         | 56 (7%)                        | 52 (7%)                                      | 14 (6%)                                      |                      |
| (8) Upper GR                                                         | 58 (8%)                        | 55 (7%)                                      | 13 (6%)                                      |                      |
| Baseline functional prognosis <sup>b</sup> [%] (n <sup>a</sup> =749) |                                |                                              |                                              |                      |
| Pr(GOSE>1)                                                           | 84.7 (63.5–94.9)               | 84.1 (62.1–94.7)                             | 83.8 (66.9–94.0)                             | 0.664                |
| Pr(GOSE>3)                                                           | 53.9 (29.9–76.0)               | 53.1 (29.2–75.0)                             | 52.4 (33.9–71.1)                             | 0.287                |
| Pr(GOSE>4)                                                           | 39.6 (20.6–59.6)               | 38.9 (19.8–58.3)                             | 38.1 (22.6–54.6)                             | 0.154                |
| Pr(GOSE>5)                                                           | 21.1 (10.2–36.8)               | 20.7 (10.0–36.0)                             | 19.3 (10.5–30.1)                             | 0.037                |
| Pr(GOSE>6)                                                           | 12.4 (5.9–20.8)                | 12.0 (5.8–19.9)                              | 10.9 (5.8–17.2)                              | 0.009                |
| Pr(GOSE>7)                                                           | 4.8 (2.2–9.2)                  | 4.7 (2.2–9.1)                                | 5.3 (2.2–8.5)                                | 0.415                |
| TIL <sub>max</sub>                                                   | 10 (6–14)                      | 10 (6–14)                                    | 10 (6–14)                                    | 0.577                |
| TIL <sub>median</sub>                                                | 5 (3–10)                       | 5 (3–10)                                     | 5 (4–10)                                     | 0.826                |
| TIL <sub>24</sub> scores                                             |                                |                                              |                                              |                      |
| Day 1 (n <sup>a</sup> =852)                                          | 7 (4–11)                       | 7 (4–11)                                     | 7 (5–10)                                     | 0.134                |
| Day 2 (n <sup>a</sup> =839)                                          | 6 (4–10)                       | 6 (4–10)                                     | 6 (4–10)                                     | 0.860                |
| Day 3 (n <sup>a</sup> =819)                                          | 6 (3–9)                        | 6 (3–9)                                      | 6 (4–9)                                      | 0.926                |
| Day 4 (n <sup>a</sup> =787)                                          | 6 (3–10)                       | 6 (3–10)                                     | 5 (4–10)                                     | 0.372                |
| Day 5 (n <sup>a</sup> =761)                                          | 5 (3–10)                       | 5 (3–10)                                     | 5 (3–10)                                     | 0.941                |
| Day 6 (n <sup>a</sup> =733)                                          | 5 (2–9)                        | 5 (2.5–9)                                    | 5 (3–10)                                     | 0.337                |
| Day 7 (n <sup>a</sup> =709)                                          | 5 (2–9)                        | 4 (2–9)                                      | 5 (2–9)                                      | 0.425                |

Abbreviations: Baseline GCS=Glasgow Coma Scale at ICU admission, from 3 to 15, GOSE=GOS–Extended, GR=good recovery, ICP=intracranial pressure, ICP<sub>EH</sub>=end-hour ICP, ICP<sub>HR</sub>=high-resolution ICP, Marshall CT=Marshall computerised tomography classification, MD=moderate disability, Pr(GOSE>•)="probability of GOSE greater than • at six months post-injury" as previously calculated from the first 24 hours of admission,<sup>27</sup> SD=severe disability, TIL=Therapy Intensity Level scale, TIL<sub>24</sub>=TIL score of calendar day in ICU, TIL<sub>max</sub>=maximum TIL<sub>24</sub> over first week of ICU stay, TIL<sub>median</sub>=median TIL<sub>24</sub> over first week of ICU stay. Data are median (IQR) for numeric characteristics and n (% of column group) for categorical characteristics, unless

otherwise indicated. Units or numerical definitions of characteristics are provided in square brackets.

<sup>a</sup>Limited sample size of non-missing values for characteristic.

<sup>b</sup>Ordinal functional outcome prognostic scores were calculated through tokenised embedding of all clinical information in the first 24 hours of ICU stay, as described previously.<sup>27</sup>

<sup>c</sup>*p*-values, comparing patients in TIL-ICP<sub>HR</sub> sub-population to those not in TIL-ICP<sub>HR</sub> sub-population, are derived from with Welch's *t*-test for numeric variables and  $\chi^2$  contingency table test for categorical variables.



**Table 3. Optimised ranges for TIL categorisation**

| Category                                          | Derived ranges             | Performance (95% confidence intervals) |              |              | Case counts <sup>c</sup> |      | Previously proposed ranges <sup>d</sup> |
|---------------------------------------------------|----------------------------|----------------------------------------|--------------|--------------|--------------------------|------|-----------------------------------------|
|                                                   |                            | Sensitivity                            | Specificity  | Accuracy     | No                       | Yes  |                                         |
| Refractory intracranial hypertension <sup>a</sup> | TIL <sub>max</sub> ≥14     | 68% (62–74%)                           | 79% (77–81%) | 77% (75–79%) | 707                      | 157  | TIL <sub>max</sub> ≥11                  |
|                                                   | TIL <sub>median</sub> ≥7.5 | 81% (77–87%)                           | 72% (70–75%) | 74% (72–76%) |                          |      | –                                       |
| Day of surgical ICP control <sup>b</sup>          | TIL <sub>24</sub> ≥9       | 87% (83–91%)                           | 74% (72–76%) | 76% (74–77%) | 4916                     | 585  | –                                       |
| TIL <sup>(Basic)</sup> <sub>24</sub>              |                            |                                        |              | 72% (70–73%) |                          |      |                                         |
| (1) Basic ICU care                                | 1≤TIL <sub>24</sub> ≤2     |                                        |              |              | 4932                     | 568  | 1≤TIL <sub>24</sub> ≤3                  |
| (2) Mild                                          | 3≤TIL <sub>24</sub> ≤6     |                                        |              |              | 3294                     | 2206 | 4≤TIL <sub>24</sub> ≤7                  |
| (3) Moderate                                      | 7≤TIL <sub>24</sub> ≤8     |                                        |              |              | 4709                     | 791  | 8≤TIL <sub>24</sub> ≤10                 |
| (4) Extreme                                       | TIL <sub>24</sub> ≥9       |                                        |              |              | 3919                     | 1581 | TIL <sub>24</sub> ≥11                   |

Abbreviations: ICP=intracranial pressure, ICU=intensive care unit, TIL=Therapy Intensity Level scale,<sup>8,9</sup> TIL<sup>(Basic)</sup>=condensed TIL scale.<sup>8</sup> The numeric definition of each scale is listed in Table 1, and the calculation of daily (e.g., TIL<sub>24</sub>), maximum (e.g., TIL<sub>max</sub>), and median (e.g., TIL<sub>median</sub>) scores is described in the Methods. The 95% confidence intervals of performance metrics were derived from bootstrapping with 1,000 resamples of unique patients over 100 missing value imputations.

<sup>a</sup>Refractory intracranial hypertension was defined as recurrent, sustained (i.e., of at least ten minutes) increases of ICP above 20 mmHg despite medical ICP management during ICU stay. This information was recorded by attending physicians in patient discharge summaries.

<sup>b</sup>If a decompressive craniectomy was performed as a last resort for refractory intracranial hypertension, each of the days following the operation were also considered days of surgical ICP control.

<sup>c</sup>For refractory intracranial hypertension, case counts represent the number of patients (with non-missing values) without (i.e., No) and with (i.e., Yes) refractory intracranial hypertension. For day of surgical ICP control and TIL<sup>(Basic)</sup><sub>24</sub>, case counts represent the number of non-missing TIL assessments not in (i.e., No) and in (i.e., Yes) the given category.

<sup>d</sup>Thresholds were previously proposed by the interagency panel which developed TIL based on expert opinion.<sup>8</sup>
